# Supplementary material for: GMEB2 Promotes the Growth of Colorectal Cancer by Activating ADRM1 Transcription and NF-κB Signalling and Is Positively Regulated by the m6A Reader YTHDF1
Source: MDPI journal article supplement (doi:10.3390/cancers14246046), 2022-12-08
Supplement: s1 [file s1]

**Supplementary Table S2. Primary and secondary antibodies**

| <b>Antibody</b>            | <b>Application</b> | <b>Host</b> | <b>Vendor</b>             |
|----------------------------|--------------------|-------------|---------------------------|
| anti-GMEB2                 | WB, IHC            | Rabbit      | Bioss, #bs-13456R         |
| anti-GMEB2                 | ChIP               | Mouse       | Santa Cruz, #sc-81093     |
| anti-ADRM1                 | WB                 | Rabbit      | Zen Bio, #R23396          |
| anti-YTHDF1                | WB, RIP            | Rabbit      | Proteintech, #17479-1-AP  |
| anti-METTL3                | WB                 | Rabbit      | Proteintech, #15073-1-AP  |
| anti-NF- $\kappa$ B        | WB, IF             | Mouse       | Zen Bio, #250060          |
| anti- $\beta$ -actin       | WB                 | Rabbit      | Proteintech, # 20536-1-AP |
| anti-GAPDH                 | WB                 | Rabbit      | Proteintech, #10494-1-AP  |
| anti-Histone-H3            | WB                 | Rabbit      | Proteintech, #17168-1-AP  |
| HRP anti-Rabbit IgG        | WB                 | Goat        | ABclonal, #AS029          |
| HRP anti-Mouse IgG         | WB                 | Goat        | ABclonal, #AS003          |
| Dylight 594 anti-Mouse IgG | IF                 | Goat        | Immunoway, #RS23410       |
