# Supplementary material for: GMEB2 Promotes the Growth of Colorectal Cancer by Activating ADRM1 Transcription and NF-κB Signalling and Is Positively Regulated by the m6A Reader YTHDF1
Source: MDPI journal article supplement (doi:10.3390/cancers14246046), 2022-12-08
Supplement: s1 [file s1]

**Supplementary Table S1. Primers and shRNA sequences**

| Application        | Target gene   | Forward sequence (5' to 3') | Reverse sequence (5' to 3') |
|--------------------|---------------|-----------------------------|-----------------------------|
| qRT-PCR<br>primers | human GMEB2   | GGCGACCTGACGGAAGATAAC       | TCGTCGTAAGTGAACACATTTCAC    |
|                    | human ADRM1   | TTCAGCAGACGGACGACTC         | CACCCGCTTGAAGTCAACAG        |
|                    | human YTHDF1  | ATACCTCACCACCTACGGACA       | GTGCTGATAGATGTTGTTCCCC      |
|                    | human METTL3  | TTGTCTCCAACCTTCCGTAGT       | CCAGATCAGAGAGGTGGTGTAG      |
|                    | human GAPDH   | ACCTGACCTGCCGTCTAGAA        | TCCACCACCCTGTTGCTGTA        |
|                    | human PRPF6   | GAGGATGCTGACAGTTGTGTAG      | CCATGGTTCTTCTCGAAGTACG      |
|                    | human DNAJC5  | GGGAGTCATTGTACCACGTCC       | CGTGCGCGTTGTTGATCTC         |
|                    | human MTG2    | TTTGTGGACTATCGGAGAGTGC      | CGACGACAGGGACTTGACTT        |
|                    | human DDO1    | AAAGGCGACCCGAGCAATG         | GCTTGGCGATAGTGGTCCTTC       |
|                    | human LSM14B  | GAAGACCGTCCCACAGATAGG       | GCTGAGCTTTCGGAGGTTCA        |
|                    | human SS18L1  | CAAGGCACCATCGGCAACTA        | CTGCTGCATCATGGAGACTG        |
|                    | human ASXL1   | CGCGCCTGGTATTAGAAAAC        | GCATCCTTCTTGAGCGTGAAAAG     |
|                    | human RALY    | GCACAAGGGCTATGCCTTTG        | CTTAGGCTCTCCAGCCATGTT       |
|                    | human UCKL1   | AATGAACACGGCACGCAATC        | GCTCAGTCAGCACCTTGTAGAA      |
|                    | human SPATA2  | CCTCTACCCGTGGAAGAAGGA       | TCTGCTCACACTCGACTTTGG       |
|                    | human ARFGAP1 | CTTTAGGGATAAGGTGGTCGCT      | AGGTCATCATTAGCCAGTCT        |
|                    | human DHX35   | GCTGCTGTTACAGTTGCAGG        | CTGGTCGGTGCAGTCATCAA        |
|                    | human TM9SF4  | GATTGGTTGCCGTGGTCTTTA       | TTCTACGGGATCGTTCTGGTG       |

|                                |                  |                        |                        |
|--------------------------------|------------------|------------------------|------------------------|
| ChIP-qPCR<br>primers           | ADRM1 promoter 1 | CTGCCAGCATCAACACCAACG  | ACAGCTGTGTGCTTACGTGCT  |
|                                | ADRM1 promoter 2 | CACAGCAACAATAGGGGCCG   | GGCTCTAACCTGCCAACGAT   |
| MeRIP and RIP<br>-qPCR primers | GMEB2 mRNA       | AGCGGAAGTAGCCGACA      | GCGATTCCTCTCTTTGGTTCTG |
| shRNA                          | human GMEB2      | G TTCAGTACGACGAGCATGTA |                        |
|                                | human ADRM1      | AGTCAACGAGTATCTGAACAA  |                        |
|                                | human YTHDF1     | ATCGGTCTAAAGTGCTAATTT  |                        |
|                                | human METTL3     | CTGCAAGTATGTTCACTATGA  |                        |
