# Supplementary material for: GMEB2 Promotes the Growth of Colorectal Cancer by Activating ADRM1 Transcription and NF-κB Signalling and Is Positively Regulated by the m6A Reader YTHDF1
Source: Cancers (Basel). 2022 Dec 8;14(24):6046. doi: 10.3390/cancers14246046 (PMC9776391; doi:10.3390/cancers14246046)
Supplement: Supplementary file 1 [file cancers-14-06046-s001.zip]

Archive with 6 entries (6 files):
- Supplementary Figure S1-S3.pdf
- Supplementary Table S1.pdf
- Supplementary Table S2.pdf
- Supplementary Table S3.xlsx
- Supplementary Table S4.xlsx
- Supplementary Table S5.xlsx
