# Supplementary material for: GMEB2 Promotes the Growth of Colorectal Cancer by Activating ADRM1 Transcription and NF-κB Signalling and Is Positively Regulated by the m6A Reader YTHDF1
Source: Cancers (Basel). 2022 Dec 8;14(24):6046. doi: 10.3390/cancers14246046 (PMC9776391; doi:10.3390/cancers14246046)
Supplement: Supplementary file 1 [file cancers-14-06046-s001.zip › Supplementary Table S3.xlsx]

## Sheet: Sheet1
Supplementary Table S3
GMEB2 ChIP-seq dataset in GSE104247
	ENSEMBL	GENE SYMBOL	GENE NAME
1	ENSG00000186446	ZNF501	zinc finger protein 501
2	ENSG00000168952	STXBP6	syntaxin binding protein 6
3	ENSG00000173914	RBM4B	RNA binding motif protein 4B
4	ENSG00000265972	TXNIP	thioredoxin interacting protein
5	ENSG00000170632	ARMC10	armadillo repeat containing 10
6	ENSG00000102144	PGK1	phosphoglycerate kinase 1
7	ENSG00000174748	RPL15	ribosomal protein L15
8	ENSG00000165632	TAF3	TATA-box binding protein associated factor 3
9	ENSG00000105063	PPP6R1	protein phosphatase 6 regulatory subunit 1
10	ENSG00000070761	CFAP20	cilia and flagella associated protein 20
11	ENSG00000237765	FAM200B	family with sequence similarity 200 member B
12	ENSG00000119509	INVS	inversin
13	ENSG00000280789	PAGR1	PAXIP1 associated glutamate rich protein 1
14	ENSG00000108591	DRG2	developmentally regulated GTP binding protein 2
15	ENSG00000171307	ZDHHC16	zinc finger DHHC-type palmitoyltransferase 16
16	ENSG00000099991	CABIN1	calcineurin binding protein 1
17	ENSG00000168517	HEXIM2	HEXIM P-TEFb complex subunit 2
18	ENSG00000136143	SUCLA2	succinate-CoA ligase ADP-forming subunit beta
19	ENSG00000234171	RNASEH1-AS1	RNASEH1 antisense RNA 1
20	ENSG00000204256	BRD2	bromodomain containing 2
21	ENSG00000163597	SNHG16	small nucleolar RNA host gene 16
22	ENSG00000140612	SEC11A	SEC11 homolog A, signal peptidase complex subunit
23	ENSG00000148572	NRBF2	nuclear receptor binding factor 2
24	ENSG00000100982	PCIF1	phosphorylated CTD interacting factor 1
25	ENSG00000222365	SNORD12B	small nucleolar RNA, C/D box 12B
26	ENSG00000170836	PPM1D	protein phosphatase, Mg2+/Mn2+ dependent 1D
27	ENSG00000114784	EIF1B	eukaryotic translation initiation factor 1B
28	ENSG00000124357	NAGK	N-acetylglucosamine kinase
29	ENSG00000124787	RPP40	ribonuclease P/MRP subunit p40
30	ENSG00000197429	IPP	intracisternal A particle-promoted polypeptide
31	ENSG00000012660	ELOVL5	ELOVL fatty acid elongase 5
32	ENSG00000112245	PTP4A1	protein tyrosine phosphatase 4A1
33	ENSG00000167550	RHEBL1	RHEB like 1
34	ENSG00000096384	HSP90AB1	heat shock protein 90 alpha family class B member 1
35	ENSG00000165119	HNRNPK	heterogeneous nuclear ribonucleoprotein K
36	ENSG00000142556	ZNF614	zinc finger protein 614
37	ENSG00000156639	ZFAND3	zinc finger AN1-type containing 3
38	ENSG00000106603	COA1	cytochrome c oxidase assembly factor 1 homolog
39	ENSG00000219545	UMAD1	UBAP1-MVB12-associated (UMA) domain containing 1
40	ENSG00000153066	TXNDC11	thioredoxin domain containing 11
41	ENSG00000007080	CCDC124	coiled-coil domain containing 124
42	ENSG00000128016	ZFP36	ZFP36 ring finger protein
43	ENSG00000204580	DDR1	discoidin domain receptor tyrosine kinase 1
44	ENSG00000167797	CDK2AP2	cyclin dependent kinase 2 associated protein 2
45	ENSG00000122482	ZNF644	zinc finger protein 644
46	ENSG00000177889	UBE2N	ubiquitin conjugating enzyme E2 N
47	ENSG00000159459	UBR1	ubiquitin protein ligase E3 component n-recognin 1
48	ENSG00000171433	GLOD5	glyoxalase domain containing 5
49	ENSG00000244687	UBE2V1	ubiquitin conjugating enzyme E2 V1
50	ENSG00000172530	BANP	BTG3 associated nuclear protein
51	ENSG00000143401	ANP32E	acidic nuclear phosphoprotein 32 family member E
52	ENSG00000175087	PDIK1L	PDLIM1 interacting kinase 1 like
53	ENSG00000185104	FAF1	Fas associated factor 1
54	ENSG00000100348	TXN2	thioredoxin 2
55	ENSG00000087157	PGS1	phosphatidylglycerophosphate synthase 1
56	ENSG00000143294	PRCC	proline rich mitotic checkpoint control factor
57	ENSG00000177733	HNRNPA0	heterogeneous nuclear ribonucleoprotein A0
58	ENSG00000167799	NUDT8	nudix hydrolase 8
59	ENSG00000117748	RPA2	replication protein A2
60	ENSG00000144895	EIF2A	eukaryotic translation initiation factor 2A
61	ENSG00000067365	METTL22	methyltransferase like 22
62	ENSG00000183048	SLC25A10	solute carrier family 25 member 10
63	ENSG00000167377	ZNF23	zinc finger protein 23
64	ENSG00000174238	PITPNA	phosphatidylinositol transfer protein alpha
65	ENSG00000152642	GPD1L	glycerol-3-phosphate dehydrogenase 1 like
66	ENSG00000165480	SKA3	spindle and kinetochore associated complex subunit 3
67	ENSG00000145592	RPL37	ribosomal protein L37
68	ENSG00000240889	NDUFB2-AS1	NDUFB2 antisense RNA 1
69	ENSG00000173540	GMPPB	GDP-mannose pyrophosphorylase B
70	ENSG00000080819	CPOX	coproporphyrinogen oxidase
71	ENSG00000117593	DARS2	aspartyl-tRNA synthetase 2, mitochondrial
72	ENSG00000170832	USP32	ubiquitin specific peptidase 32
73	ENSG00000234857	HNRNPUL2-BSCL2	HNRNPUL2-BSCL2 readthrough (NMD candidate)
74	ENSG00000126803	HSPA2	heat shock protein family A (Hsp70) member 2
75	ENSG00000121897	LIAS	lipoic acid synthetase
76	ENSG00000182923	CEP63	centrosomal protein 63
77	ENSG00000187672	ERC2	ELKS/RAB6-interacting/CAST family member 2
78	ENSG00000142528	ZNF473	zinc finger protein 473
79	ENSG00000204335	SP5	Sp5 transcription factor
80	ENSG00000138592	USP8	ubiquitin specific peptidase 8
81	ENSG00000196636	SDHAF3	succinate dehydrogenase complex assembly factor 3
82	ENSG00000101189	MRGBP	MRG domain binding protein
83	ENSG00000183527	PSMG1	proteasome assembly chaperone 1
84	ENSG00000137824	RMDN3	regulator of microtubule dynamics 3
85	ENSG00000009413	REV3L	REV3 like, DNA directed polymerase zeta catalytic subunit
86	ENSG00000115268	RPS15	ribosomal protein S15
87	ENSG00000124802	EEF1E1	eukaryotic translation elongation factor 1 epsilon 1
88	ENSG00000113194	FAF2	Fas associated factor family member 2
89	ENSG00000198911	SREBF2	sterol regulatory element binding transcription factor 2
90	ENSG00000226174	TEX22	testis expressed 22
91	ENSG00000147905	ZCCHC7	zinc finger CCHC-type containing 7
92	ENSG00000112305	SMAP1	small ArfGAP 1
93	ENSG00000101057	MYBL2	MYB proto-oncogene like 2
94	ENSG00000236383	CCDC200	coiled-coil domain containing 200
95	ENSG00000114956	DGUOK	deoxyguanosine kinase
96	ENSG00000247626	MARS2	methionyl-tRNA synthetase 2, mitochondrial
97	ENSG00000151923	TIAL1	TIA1 cytotoxic granule associated RNA binding protein like 1
98	ENSG00000109929	SC5D	sterol-C5-desaturase
99	ENSG00000203667	COX20	cytochrome c oxidase assembly factor COX20
100	ENSG00000038274	MAT2B	methionine adenosyltransferase 2B
101	ENSG00000119912	IDE	insulin degrading enzyme
102	ENSG00000103342	GSPT1	G1 to S phase transition 1
103	ENSG00000100902	PSMA6	proteasome 20S subunit alpha 6
104	ENSG00000275238	MIR4734	microRNA 4734
105	ENSG00000125875	TBC1D20	TBC1 domain family member 20
106	ENSG00000077152	UBE2T	ubiquitin conjugating enzyme E2 T
107	ENSG00000136861	CDK5RAP2	CDK5 regulatory subunit associated protein 2
108	ENSG00000197183	NOL4L	nucleolar protein 4 like
109	ENSG00000104824	HNRNPL	heterogeneous nuclear ribonucleoprotein L
110	ENSG00000112773	TENT5A	terminal nucleotidyltransferase 5A
111	ENSG00000117682	DHDDS	dehydrodolichyl diphosphate synthase subunit
112	ENSG00000168303	MPLKIP	M-phase specific PLK1 interacting protein
113	ENSG00000099956	SMARCB1	SWI/SNF related, matrix associated, actin dependent regulator of chromatin, subfamily b, member 1
114	ENSG00000198860	TSEN15	tRNA splicing endonuclease subunit 15
115	ENSG00000132964	CDK8	cyclin dependent kinase 8
116	ENSG00000213654	GPSM3	G protein signaling modulator 3
117	ENSG00000140939	NOL3	nucleolar protein 3
118	ENSG00000258701	LINC00638	long intergenic non-protein coding RNA 638
119	ENSG00000112237	CCNC	cyclin C
120	ENSG00000105810	CDK6	cyclin dependent kinase 6
121	ENSG00000118217	ATF6	activating transcription factor 6
122	ENSG00000196696	PDXDC2P-NPIPB14P	nuclear pore complex-interacting protein
123	ENSG00000166851	PLK1	polo like kinase 1
124	ENSG00000265345	MIR5188	microRNA 5188
125	ENSG00000164880	INTS1	integrator complex subunit 1
126	ENSG00000130338	TULP4	TUB like protein 4
127	ENSG00000188529	SRSF10	serine and arginine rich splicing factor 10
128	ENSG00000143420	ENSA	endosulfine alpha
129	ENSG00000185404	SP140L	SP140 nuclear body protein like
130	ENSG00000136878	USP20	ubiquitin specific peptidase 20
131	ENSG00000131408	NR1H2	nuclear receptor subfamily 1 group H member 2
132	ENSG00000214309	MBLAC1	metallo-beta-lactamase domain containing 1
133	ENSG00000180398	MCFD2	multiple coagulation factor deficiency 2, ER cargo receptor complex subunit
134	ENSG00000170889	RPS9	ribosomal protein S9
135	ENSG00000172057	ORMDL3	ORMDL sphingolipid biosynthesis regulator 3
136	ENSG00000162994	CLHC1	clathrin heavy chain linker domain containing 1
137	ENSG00000105202	FBL	fibrillarin
138	ENSG00000265681	RPL17	ribosomal protein L17
139	ENSG00000095383	TBC1D2	TBC1 domain family member 2
140	ENSG00000163626	COX18	cytochrome c oxidase assembly factor COX18
141	ENSG00000101639	CEP192	centrosomal protein 192
142	ENSG00000205838	TTC23L	tetratricopeptide repeat domain 23 like
143	NA	STARD7-AS1	STARD7 antisense RNA 1
144	ENSG00000158169	FANCC	FA complementation group C
145	ENSG00000146678	IGFBP1	insulin like growth factor binding protein 1
146	ENSG00000146433	TMEM181	transmembrane protein 181
147	ENSG00000141040	ZNF287	zinc finger protein 287
148	NA	SENP3-EIF4A1	SENP3-EIF4A1 readthrough (NMD candidate)
149	ENSG00000243477	NAA80	N-alpha-acetyltransferase 80, NatH catalytic subunit
150	ENSG00000144285	SCN1A	sodium voltage-gated channel alpha subunit 1
151	ENSG00000092148	HECTD1	HECT domain E3 ubiquitin protein ligase 1
152	ENSG00000177732	SOX12	SRY-box transcription factor 12
153	ENSG00000182831	C16orf72	chromosome 16 open reading frame 72
154	ENSG00000076321	KLHL20	kelch like family member 20
155	ENSG00000107372	ZFAND5	zinc finger AN1-type containing 5
156	ENSG00000029639	TFB1M	transcription factor B1, mitochondrial
157	ENSG00000119965	C10orf88	chromosome 10 open reading frame 88
158	ENSG00000143368	SF3B4	splicing factor 3b subunit 4
159	ENSG00000061794	MRPS35	mitochondrial ribosomal protein S35
160	ENSG00000111912	NCOA7	nuclear receptor coactivator 7
161	ENSG00000094804	CDC6	cell division cycle 6
162	ENSG00000131051	RBM39	RNA binding motif protein 39
163	ENSG00000132507	EIF5A	eukaryotic translation initiation factor 5A
164	ENSG00000148655	LRMDA	leucine rich melanocyte differentiation associated
165	ENSG00000067334	DNTTIP2	deoxynucleotidyltransferase terminal interacting protein 2
166	ENSG00000116898	MRPS15	mitochondrial ribosomal protein S15
167	ENSG00000005436	GCFC2	GC-rich sequence DNA-binding factor 2
168	ENSG00000083457	ITGAE	integrin subunit alpha E
169	ENSG00000099341	PSMD8	proteasome 26S subunit, non-ATPase 8
170	ENSG00000133119	RFC3	replication factor C subunit 3
171	ENSG00000275700	AATF	apoptosis antagonizing transcription factor
172	ENSG00000153207	AHCTF1	AT-hook containing transcription factor 1
173	ENSG00000221916	C19orf73	chromosome 19 open reading frame 73
174	ENSG00000068878	PSME4	proteasome activator subunit 4
175	ENSG00000185267	CDNF	cerebral dopamine neurotrophic factor
176	ENSG00000197062	ZSCAN26	zinc finger and SCAN domain containing 26
177	ENSG00000131475	VPS25	vacuolar protein sorting 25 homolog
178	ENSG00000268654	MIMT1	MER1 repeat containing imprinted transcript 1
179	ENSG00000138071	ACTR2	actin related protein 2
180	ENSG00000177200	CHD9	chromodomain helicase DNA binding protein 9
181	ENSG00000171621	SPSB1	splA/ryanodine receptor domain and SOCS box containing 1
182	ENSG00000084674	APOB	apolipoprotein B
183	ENSG00000168286	THAP11	THAP domain containing 11
184	ENSG00000052723	SIKE1	suppressor of IKBKE 1
185	ENSG00000127616	SMARCA4	SWI/SNF related, matrix associated, actin dependent regulator of chromatin, subfamily a, member 4
186	ENSG00000223972	DDX11L2	DEAD/H-box helicase 11 like 2 (pseudogene)
187	ENSG00000198130	HIBCH	3-hydroxyisobutyryl-CoA hydrolase
188	ENSG00000089248	ERP29	endoplasmic reticulum protein 29
189	NA	TMEM44-AS1	TMEM44 antisense RNA 1
190	ENSG00000100941	PNN	pinin, desmosome associated protein
191	ENSG00000161920	MED11	mediator complex subunit 11
192	ENSG00000003436	TFPI	tissue factor pathway inhibitor
193	ENSG00000129515	SNX6	sorting nexin 6
194	ENSG00000144029	MRPS5	mitochondrial ribosomal protein S5
195	ENSG00000112031	MTRF1L	mitochondrial translation release factor 1 like
196	ENSG00000225921	NOL7	nucleolar protein 7
197	ENSG00000008083	JARID2	jumonji and AT-rich interaction domain containing 2
198	ENSG00000125863	MKKS	MKKS centrosomal shuttling protein
199	ENSG00000171497	PPID	peptidylprolyl isomerase D
200	ENSG00000134905	CARS2	cysteinyl-tRNA synthetase 2, mitochondrial
201	ENSG00000157224	CLDN12	claudin 12
202	ENSG00000113161	HMGCR	3-hydroxy-3-methylglutaryl-CoA reductase
203	ENSG00000141574	SECTM1	secreted and transmembrane 1
204	ENSG00000112118	MCM3	minichromosome maintenance complex component 3
205	ENSG00000167094	TTC16	tetratricopeptide repeat domain 16
206	ENSG00000166669	ATF7IP2	activating transcription factor 7 interacting protein 2
207	ENSG00000004897	CDC27	cell division cycle 27
208	ENSG00000145012	LPP	LIM domain containing preferred translocation partner in lipoma
209	ENSG00000121579	NAA50	N-alpha-acetyltransferase 50, NatE catalytic subunit
210	ENSG00000170412	GPRC5C	G protein-coupled receptor class C group 5 member C
211	ENSG00000186300	ZNF555	zinc finger protein 555
212	ENSG00000187187	ZNF546	zinc finger protein 546
213	ENSG00000171456	ASXL1	ASXL transcriptional regulator 1
214	ENSG00000183283	DAZAP2	DAZ associated protein 2
215	ENSG00000187627	RGPD1	RANBP2 like and GRIP domain containing 1
216	ENSG00000112419	PHACTR2	phosphatase and actin regulator 2
217	ENSG00000214517	PPME1	protein phosphatase methylesterase 1
218	ENSG00000107643	MAPK8	mitogen-activated protein kinase 8
219	ENSG00000188825	LINC00910	long intergenic non-protein coding RNA 910
220	ENSG00000169188	APEX2	apurinic/apyrimidinic endodeoxyribonuclease 2
221	ENSG00000130150	MOSPD2	motile sperm domain containing 2
222	ENSG00000160271	RALGDS	ral guanine nucleotide dissociation stimulator
223	ENSG00000169180	XPO6	exportin 6
224	ENSG00000167291	TBC1D16	TBC1 domain family member 16
225	ENSG00000132471	WBP2	WW domain binding protein 2
226	ENSG00000073111	MCM2	minichromosome maintenance complex component 2
227	ENSG00000136925	TSTD2	thiosulfate sulfurtransferase like domain containing 2
228	ENSG00000137193	PIM1	Pim-1 proto-oncogene, serine/threonine kinase
229	ENSG00000175387	SMAD2	SMAD family member 2
230	ENSG00000167526	RPL13	ribosomal protein L13
231	ENSG00000136527	TRA2B	transformer 2 beta homolog
232	ENSG00000129255	MPDU1	mannose-P-dolichol utilization defect 1
233	ENSG00000101266	CSNK2A1	casein kinase 2 alpha 1
234	ENSG00000156831	NSMCE2	NSE2 (MMS21) homolog, SMC5-SMC6 complex SUMO ligase
235	ENSG00000113575	PPP2CA	protein phosphatase 2 catalytic subunit alpha
236	ENSG00000102738	MRPS31	mitochondrial ribosomal protein S31
237	ENSG00000116062	MSH6	mutS homolog 6
238	ENSG00000187514	PTMA	prothymosin alpha
239	ENSG00000130699	TAF4	TATA-box binding protein associated factor 4
240	ENSG00000198870	STKLD1	serine/threonine kinase like domain containing 1
241	ENSG00000168610	STAT3	signal transducer and activator of transcription 3
242	ENSG00000168710	AHCYL1	adenosylhomocysteinase like 1
243	ENSG00000106351	AGFG2	ArfGAP with FG repeats 2
244	ENSG00000124299	PEPD	peptidase D
245	ENSG00000241945	PWP2	PWP2 small subunit processome component
246	ENSG00000213780	GTF2H4	general transcription factor IIH subunit 4
247	NA	LINC00674	long intergenic non-protein coding RNA 674
248	ENSG00000130193	THEM6	thioesterase superfamily member 6
249	ENSG00000158195	WASF2	WASP family member 2
250	ENSG00000100311	PDGFB	platelet derived growth factor subunit B
251	ENSG00000129514	FOXA1	forkhead box A1
252	ENSG00000186889	TMEM17	transmembrane protein 17
253	ENSG00000197217	ENTPD4	ectonucleoside triphosphate diphosphohydrolase 4
254	ENSG00000183454	GRIN2A	glutamate ionotropic receptor NMDA type subunit 2A
255	ENSG00000171475	WIPF2	WAS/WASL interacting protein family member 2
256	ENSG00000274641	H2BC17	H2B clustered histone 17
257	ENSG00000105220	GPI	glucose-6-phosphate isomerase
258	ENSG00000126249	PDCD2L	programmed cell death 2 like
259	ENSG00000149100	EIF3M	eukaryotic translation initiation factor 3 subunit M
260	ENSG00000120137	PANK3	pantothenate kinase 3
261	ENSG00000174891	RSRC1	arginine and serine rich coiled-coil 1
262	ENSG00000106460	TMEM106B	transmembrane protein 106B
263	ENSG00000114779	ABHD14B	abhydrolase domain containing 14B
264	ENSG00000034510	TMSB10	thymosin beta 10
265	ENSG00000055044	NOP58	NOP58 ribonucleoprotein
266	ENSG00000121988	ZRANB3	zinc finger RANBP2-type containing 3
267	ENSG00000167632	TRAPPC9	trafficking protein particle complex subunit 9
268	ENSG00000172071	EIF2AK3	eukaryotic translation initiation factor 2 alpha kinase 3
269	ENSG00000177879	AP3S1	adaptor related protein complex 3 subunit sigma 1
270	ENSG00000148334	PTGES2	prostaglandin E synthase 2
271	ENSG00000189043	NDUFA4	NDUFA4 mitochondrial complex associated
272	ENSG00000063046	EIF4B	eukaryotic translation initiation factor 4B
273	ENSG00000197935	ZNF311	zinc finger protein 311
274	ENSG00000162585	FAAP20	FA core complex associated protein 20
275	ENSG00000198836	OPA1	OPA1 mitochondrial dynamin like GTPase
276	ENSG00000164379	FOXQ1	forkhead box Q1
277	ENSG00000158435	CNOT11	CCR4-NOT transcription complex subunit 11
278	ENSG00000154144	TBRG1	transforming growth factor beta regulator 1
279	ENSG00000145016	RUBCN	rubicon autophagy regulator
280	ENSG00000150867	PIP4K2A	phosphatidylinositol-5-phosphate 4-kinase type 2 alpha
281	ENSG00000197774	EME2	essential meiotic structure-specific endonuclease subunit 2
282	ENSG00000121057	AKAP1	A-kinase anchoring protein 1
283	ENSG00000196981	WDR5B	WD repeat domain 5B
284	ENSG00000205339	IPO7	importin 7
285	NA	EPB41L4A-AS1	EPB41L4A antisense RNA 1
286	ENSG00000100991	TRPC4AP	transient receptor potential cation channel subfamily C member 4 associated protein
287	ENSG00000198799	LRIG2	leucine rich repeats and immunoglobulin like domains 2
288	ENSG00000182108	DEXI	Dexi homolog
289	ENSG00000151327	FAM177A1	family with sequence similarity 177 member A1
290	ENSG00000071189	SNX13	sorting nexin 13
291	ENSG00000126368	NR1D1	nuclear receptor subfamily 1 group D member 1
292	ENSG00000101290	CDS2	CDP-diacylglycerol synthase 2
293	ENSG00000025770	NCAPH2	non-SMC condensin II complex subunit H2
294	ENSG00000130414	NDUFA10	NADH:ubiquinone oxidoreductase subunit A10
295	ENSG00000003987	MTMR7	myotubularin related protein 7
296	ENSG00000166439	RNF169	ring finger protein 169
297	ENSG00000246090	LOC100507053	uncharacterized LOC100507053
298	ENSG00000138381	ASNSD1	asparagine synthetase domain containing 1
299	ENSG00000135999	EPC2	enhancer of polycomb homolog 2
300	ENSG00000105953	OGDH	oxoglutarate dehydrogenase
301	ENSG00000116016	EPAS1	endothelial PAS domain protein 1
302	ENSG00000100596	SPTLC2	serine palmitoyltransferase long chain base subunit 2
303	ENSG00000105185	PDCD5	programmed cell death 5
304	ENSG00000284190	MIR21	microRNA 21
305	ENSG00000034677	RNF19A	ring finger protein 19A, RBR E3 ubiquitin protein ligase
306	ENSG00000155666	KDM8	lysine demethylase 8
307	ENSG00000183864	TOB2	transducer of ERBB2, 2
308	ENSG00000109534	GAR1	GAR1 ribonucleoprotein
309	ENSG00000170027	YWHAG	tyrosine 3-monooxygenase/tryptophan 5-monooxygenase activation protein gamma
310	ENSG00000177646	ACAD9	acyl-CoA dehydrogenase family member 9
311	ENSG00000162616	DNAJB4	DnaJ heat shock protein family (Hsp40) member B4
312	ENSG00000089006	SNX5	sorting nexin 5
313	ENSG00000112304	ACOT13	acyl-CoA thioesterase 13
314	ENSG00000203724	C1orf53	chromosome 1 open reading frame 53
315	ENSG00000158792	SPATA2L	spermatogenesis associated 2 like
316	ENSG00000130396	AFDN	afadin, adherens junction formation factor
317	ENSG00000125970	RALY	RALY heterogeneous nuclear ribonucleoprotein
318	ENSG00000151014	NOCT	nocturnin
319	ENSG00000235652	FBXO30-DT	FBXO30 divergent transcript
320	ENSG00000180592	SKIDA1	SKI/DACH domain containing 1
321	ENSG00000204120	GIGYF2	GRB10 interacting GYF protein 2
322	ENSG00000087263	OGFOD1	2-oxoglutarate and iron dependent oxygenase domain containing 1
323	ENSG00000083097	DOP1A	DOP1 leucine zipper like protein A
324	ENSG00000079999	KEAP1	kelch like ECH associated protein 1
325	NA	LINC00899	long intergenic non-protein coding RNA 899
326	ENSG00000144401	METTL21A	methyltransferase like 21A
327	ENSG00000121152	NCAPH	non-SMC condensin I complex subunit H
328	ENSG00000100836	PABPN1	poly(A) binding protein nuclear 1
329	ENSG00000163945	UVSSA	UV stimulated scaffold protein A
330	ENSG00000093144	ECHDC1	ethylmalonyl-CoA decarboxylase 1
331	ENSG00000130702	LAMA5	laminin subunit alpha 5
332	ENSG00000128789	PSMG2	proteasome assembly chaperone 2
333	ENSG00000100320	RBFOX2	RNA binding fox-1 homolog 2
334	ENSG00000011021	CLCN6	chloride voltage-gated channel 6
335	NA	ASB9P1	ankyrin repeat and SOCS box containing 9 pseudogene 1
336	ENSG00000091140	DLD	dihydrolipoamide dehydrogenase
337	ENSG00000105771	SMG9	SMG9 nonsense mediated mRNA decay factor
338	ENSG00000178279	TNP2	transition protein 2
339	ENSG00000189180	ZNF33A	zinc finger protein 33A
340	ENSG00000204569	PPP1R10	protein phosphatase 1 regulatory subunit 10
341	ENSG00000180228	PRKRA	protein activator of interferon induced protein kinase EIF2AK2
342	ENSG00000133958	UNC79	unc-79 homolog, NALCN channel complex subunit
343	ENSG00000115904	SOS1	SOS Ras/Rac guanine nucleotide exchange factor 1
344	ENSG00000170242	USP47	ubiquitin specific peptidase 47
345	ENSG00000177427	MIEF2	mitochondrial elongation factor 2
346	ENSG00000118523	CCN2	cellular communication network factor 2
347	ENSG00000140992	PDPK1	3-phosphoinositide dependent protein kinase 1
348	ENSG00000187742	SECISBP2	SECIS binding protein 2
349	ENSG00000103319	EEF2K	eukaryotic elongation factor 2 kinase
350	ENSG00000143970	ASXL2	ASXL transcriptional regulator 2
351	ENSG00000149925	ALDOA	aldolase, fructose-bisphosphate A
352	ENSG00000059728	MXD1	MAX dimerization protein 1
353	ENSG00000147576	ADHFE1	alcohol dehydrogenase iron containing 1
354	ENSG00000280693	SH3PXD2A-AS1	SH3PXD2A antisense RNA 1
355	ENSG00000069275	NUCKS1	nuclear casein kinase and cyclin dependent kinase substrate 1
356	ENSG00000006194	ZNF263	zinc finger protein 263
357	ENSG00000203880	PCMTD2	protein-L-isoaspartate (D-aspartate) O-methyltransferase domain containing 2
358	ENSG00000099940	SNAP29	synaptosome associated protein 29
359	ENSG00000115368	WDR75	WD repeat domain 75
360	ENSG00000215784	FAM72D	family with sequence similarity 72 member D
361	ENSG00000119636	BBOF1	basal body orientation factor 1
362	ENSG00000129696	TTI2	TELO2 interacting protein 2
363	ENSG00000144554	FANCD2	FA complementation group D2
364	ENSG00000070061	ELP1	elongator acetyltransferase complex subunit 1
365	ENSG00000149658	YTHDF1	YTH N6-methyladenosine RNA binding protein 1
366	ENSG00000103326	CAPN15	calpain 15
367	ENSG00000125901	MRPS26	mitochondrial ribosomal protein S26
368	ENSG00000188672	RHCE	Rh blood group CcEe antigens
369	ENSG00000174943	KCTD13	potassium channel tetramerization domain containing 13
370	ENSG00000203965	EFCAB7	EF-hand calcium binding domain 7
371	ENSG00000171940	ZNF217	zinc finger protein 217
372	ENSG00000241399	CD302	CD302 molecule
373	ENSG00000181031	RPH3AL	rabphilin 3A like (without C2 domains)
374	ENSG00000055070	SZRD1	SUZ RNA binding domain containing 1
375	ENSG00000182095	TNRC18	trinucleotide repeat containing 18
376	ENSG00000112977	DAP	death associated protein
377	ENSG00000189079	ARID2	AT-rich interaction domain 2
378	ENSG00000163558	PRKCI	protein kinase C iota
379	ENSG00000140093	SERPINA10	serpin family A member 10
380	ENSG00000159921	GNE	glucosamine (UDP-N-acetyl)-2-epimerase/N-acetylmannosamine kinase
381	ENSG00000198646	NCOA6	nuclear receptor coactivator 6
382	ENSG00000125971	DYNLRB1	dynein light chain roadblock-type 1
383	ENSG00000146833	TRIM4	tripartite motif containing 4
384	ENSG00000178188	SH2B1	SH2B adaptor protein 1
385	ENSG00000138375	SMARCAL1	SWI/SNF related, matrix associated, actin dependent regulator of chromatin, subfamily a like 1
386	ENSG00000105671	DDX49	DEAD-box helicase 49
387	ENSG00000111254	AKAP3	A-kinase anchoring protein 3
388	ENSG00000117523	PRRC2C	proline rich coiled-coil 2C
389	ENSG00000066379	POLR1H	RNA polymerase I subunit H
390	ENSG00000075303	SLC25A40	solute carrier family 25 member 40
391	ENSG00000112584	FAM120B	family with sequence similarity 120B
392	ENSG00000106803	SEC61B	SEC61 translocon subunit beta
393	ENSG00000100897	DCAF11	DDB1 and CUL4 associated factor 11
394	ENSG00000124177	CHD6	chromodomain helicase DNA binding protein 6
395	ENSG00000108784	NAGLU	N-acetyl-alpha-glucosaminidase
396	NA	LOC100507351	uncharacterized LOC100507351
397	ENSG00000185015	CA13	carbonic anhydrase 13
398	ENSG00000107864	CPEB3	cytoplasmic polyadenylation element binding protein 3
399	ENSG00000175536	LIPT2	lipoyl(octanoyl) transferase 2
400	NA	LINC01569	long intergenic non-protein coding RNA 1569
401	ENSG00000144659	SLC25A38	solute carrier family 25 member 38
402	ENSG00000176055	MBLAC2	metallo-beta-lactamase domain containing 2
403	ENSG00000165389	SPTSSA	serine palmitoyltransferase small subunit A
404	ENSG00000129535	NRL	neural retina leucine zipper
405	ENSG00000167863	ATP5PD	ATP synthase peripheral stalk subunit d
406	ENSG00000257727	CNPY2	canopy FGF signaling regulator 2
407	ENSG00000172167	MTBP	MDM2 binding protein
408	ENSG00000173402	DAG1	dystroglycan 1
409	ENSG00000108523	RNF167	ring finger protein 167
410	ENSG00000115073	ACTR1B	actin related protein 1B
411	ENSG00000108094	CUL2	cullin 2
412	ENSG00000149262	INTS4	integrator complex subunit 4
413	ENSG00000152620	NADK2	NAD kinase 2, mitochondrial
414	ENSG00000142330	CAPN10	calpain 10
415	ENSG00000048028	USP28	ubiquitin specific peptidase 28
416	ENSG00000124216	SNAI1	snail family transcriptional repressor 1
417	ENSG00000283196	LSP1P4	LSP1 pseudogene 4
418	NA	GSTA7P	glutathione S-transferase alpha 7, pseudogene
419	ENSG00000115806	GORASP2	golgi reassembly stacking protein 2
420	ENSG00000162882	HAAO	3-hydroxyanthranilate 3,4-dioxygenase
421	ENSG00000203690	TCP10L3	t-complex 10 like 3, pseudogene
422	ENSG00000166224	SGPL1	sphingosine-1-phosphate lyase 1
423	ENSG00000070718	AP3M2	adaptor related protein complex 3 subunit mu 2
424	ENSG00000175832	ETV4	ETS variant transcription factor 4
425	ENSG00000105085	MED26	mediator complex subunit 26
426	ENSG00000173599	PC	pyruvate carboxylase
427	ENSG00000167258	CDK12	cyclin dependent kinase 12
428	ENSG00000168014	C2CD3	C2 domain containing 3 centriole elongation regulator
429	ENSG00000139163	ETNK1	ethanolamine kinase 1
430	ENSG00000169689	CENPX	centromere protein X
431	ENSG00000196396	PTPN1	protein tyrosine phosphatase non-receptor type 1
432	ENSG00000204560	DHX16	DEAH-box helicase 16
433	ENSG00000138757	G3BP2	G3BP stress granule assembly factor 2
434	ENSG00000215472	RPL17-C18orf32	RPL17-C18orf32 readthrough
435	ENSG00000110330	BIRC2	baculoviral IAP repeat containing 2
436	ENSG00000196678	ERI2	ERI1 exoribonuclease family member 2
437	ENSG00000105341	DMAC2	distal membrane arm assembly component 2
438	ENSG00000079308	TNS1	tensin 1
439	ENSG00000166046	TCP11L2	t-complex 11 like 2
440	ENSG00000131697	NPHP4	nephrocystin 4
441	ENSG00000172171	TEFM	transcription elongation factor, mitochondrial
442	ENSG00000167615	LENG8	leukocyte receptor cluster member 8
443	ENSG00000126749	EMG1	EMG1 N1-specific pseudouridine methyltransferase
444	ENSG00000127337	YEATS4	YEATS domain containing 4
445	ENSG00000090273	NUDC	nuclear distribution C, dynein complex regulator
446	ENSG00000125826	RBCK1	RANBP2-type and C3HC4-type zinc finger containing 1
447	ENSG00000144426	NBEAL1	neurobeachin like 1
448	ENSG00000085760	MTIF2	mitochondrial translational initiation factor 2
449	ENSG00000198563	DDX39B	DExD-box helicase 39B
450	ENSG00000214401	KANSL1-AS1	KANSL1 antisense RNA 1
451	ENSG00000155052	CNTNAP5	contactin associated protein family member 5
452	ENSG00000099194	SCD	stearoyl-CoA desaturase
453	ENSG00000116688	MFN2	mitofusin 2
454	ENSG00000116138	DNAJC16	DnaJ heat shock protein family (Hsp40) member C16
455	ENSG00000121270	ABCC11	ATP binding cassette subfamily C member 11
456	ENSG00000164587	RPS14	ribosomal protein S14
457	ENSG00000124788	ATXN1	ataxin 1
458	ENSG00000243649	CFB	complement factor B
459	ENSG00000284194	SCO2	synthesis of cytochrome C oxidase 2
460	ENSG00000181938	GINS3	GINS complex subunit 3
461	ENSG00000232850	PTGES2-AS1	PTGES2 antisense RNA 1 (head to head)
462	ENSG00000204564	C6orf136	chromosome 6 open reading frame 136
463	ENSG00000116001	TIA1	TIA1 cytotoxic granule associated RNA binding protein
464	ENSG00000213853	EMP2	epithelial membrane protein 2
465	ENSG00000178307	TMEM11	transmembrane protein 11
466	ENSG00000125779	PANK2	pantothenate kinase 2
467	ENSG00000169379	ARL13B	ADP ribosylation factor like GTPase 13B
468	ENSG00000111843	TMEM14C	transmembrane protein 14C
469	ENSG00000231500	RPS18	ribosomal protein S18
470	ENSG00000133250	ZNF414	zinc finger protein 414
471	ENSG00000109111	SUPT6H	SPT6 homolog, histone chaperone and transcription elongation factor
472	NA	ARHGAP5-AS1	ARHGAP5 antisense RNA 1 (head to head)
473	ENSG00000168575	SLC20A2	solute carrier family 20 member 2
474	ENSG00000070444	MNT	MAX network transcriptional repressor
475	ENSG00000185480	PARPBP	PARP1 binding protein
476	ENSG00000101444	AHCY	adenosylhomocysteinase
477	ENSG00000115145	STAM2	signal transducing adaptor molecule 2
478	ENSG00000130299	GTPBP3	GTP binding protein 3, mitochondrial
479	ENSG00000161040	FBXL13	F-box and leucine rich repeat protein 13
480	ENSG00000125991	ERGIC3	ERGIC and golgi 3
481	ENSG00000108823	SGCA	sarcoglycan alpha
482	ENSG00000132405	TBC1D14	TBC1 domain family member 14
483	ENSG00000144504	ANKMY1	ankyrin repeat and MYND domain containing 1
484	ENSG00000100883	SRP54	signal recognition particle 54
485	ENSG00000123607	TTC21B	tetratricopeptide repeat domain 21B
486	ENSG00000101452	DHX35	DEAH-box helicase 35
487	ENSG00000115053	NCL	nucleolin
488	ENSG00000181035	SLC25A42	solute carrier family 25 member 42
489	ENSG00000101049	SGK2	serum/glucocorticoid regulated kinase 2
490	ENSG00000138095	LRPPRC	leucine rich pentatricopeptide repeat containing
491	ENSG00000148429	USP6NL	USP6 N-terminal like
492	ENSG00000004534	RBM6	RNA binding motif protein 6
493	ENSG00000277791	PSMB3	proteasome 20S subunit beta 3
494	ENSG00000139428	MMAB	metabolism of cobalamin associated B
495	ENSG00000163467	TSACC	TSSK6 activating cochaperone
496	ENSG00000128191	DGCR8	DGCR8 microprocessor complex subunit
497	ENSG00000121644	DESI2	desumoylating isopeptidase 2
498	ENSG00000204386	NEU1	neuraminidase 1
499	ENSG00000109775	UFSP2	UFM1 specific peptidase 2
500	ENSG00000115504	EHBP1	EH domain binding protein 1
501	ENSG00000250506	CDK3	cyclin dependent kinase 3
502	ENSG00000197540	GZMM	granzyme M
503	ENSG00000021355	SERPINB1	serpin family B member 1
504	ENSG00000112494	UNC93A	unc-93 homolog A
505	ENSG00000105732	ZNF574	zinc finger protein 574
506	ENSG00000065029	ZNF76	zinc finger protein 76
507	ENSG00000162997	PRORSD1P	prolyl-tRNA synthetase associated domain containing 1, pseudogene
508	ENSG00000163684	RPP14	ribonuclease P/MRP subunit p14
509	ENSG00000094914	AAAS	aladin WD repeat nucleoporin
510	ENSG00000215256	DHRS4-AS1	DHRS4 antisense RNA 1
511	ENSG00000171163	ZNF692	zinc finger protein 692
512	ENSG00000163946	TASOR	transcription activation suppressor
513	ENSG00000111669	TPI1	triosephosphate isomerase 1
514	ENSG00000084112	SSH1	slingshot protein phosphatase 1
515	ENSG00000278845	MRPL45	mitochondrial ribosomal protein L45
516	ENSG00000173473	SMARCC1	SWI/SNF related, matrix associated, actin dependent regulator of chromatin subfamily c member 1
517	ENSG00000103549	RNF40	ring finger protein 40
518	ENSG00000135709	KIAA0513	KIAA0513
519	ENSG00000132406	TMEM128	transmembrane protein 128
520	ENSG00000100647	SUSD6	sushi domain containing 6
521	ENSG00000048140	TSPAN17	tetraspanin 17
522	ENSG00000134884	ARGLU1	arginine and glutamate rich 1
523	ENSG00000171443	ZNF524	zinc finger protein 524
524	ENSG00000184517	ZFP1	ZFP1 zinc finger protein
525	ENSG00000151687	ANKAR	ankyrin and armadillo repeat containing
526	ENSG00000146063	TRIM41	tripartite motif containing 41
527	ENSG00000068724	TTC7A	tetratricopeptide repeat domain 7A
528	ENSG00000197019	SERTAD1	SERTA domain containing 1
529	ENSG00000111707	SUDS3	SDS3 homolog, SIN3A corepressor complex component
530	ENSG00000011451	WIZ	WIZ zinc finger
531	ENSG00000208037	MIR320A	microRNA 320a
532	ENSG00000136271	DDX56	DEAD-box helicase 56
533	ENSG00000005175	RPAP3	RNA polymerase II associated protein 3
534	ENSG00000008300	CELSR3	cadherin EGF LAG seven-pass G-type receptor 3
535	NA	LINC01792	long intergenic non-protein coding RNA 1792
536	ENSG00000197562	RAB40C	RAB40C, member RAS oncogene family
537	NA	MLLT10P1	MLLT10 pseudogene 1
538	ENSG00000235453	SMIM27	small integral membrane protein 27
539	ENSG00000236859	NIFK-AS1	NIFK antisense RNA 1
540	ENSG00000100852	ARHGAP5	Rho GTPase activating protein 5
541	ENSG00000105364	MRPL4	mitochondrial ribosomal protein L4
542	ENSG00000178921	PFAS	phosphoribosylformylglycinamidine synthase
543	ENSG00000143889	HNRNPLL	heterogeneous nuclear ribonucleoprotein L like
544	ENSG00000064545	TMEM161A	transmembrane protein 161A
545	ENSG00000116685	KIAA2013	KIAA2013
546	ENSG00000130349	MTRES1	mitochondrial transcription rescue factor 1
547	ENSG00000169100	SLC25A6	solute carrier family 25 member 6
548	ENSG00000169375	SIN3A	SIN3 transcription regulator family member A
549	ENSG00000157014	TATDN2	TatD DNase domain containing 2
550	ENSG00000102977	ACD	ACD shelterin complex subunit and telomerase recruitment factor
551	ENSG00000232112	TMA7	translation machinery associated 7 homolog
552	ENSG00000105879	CBLL1	Cbl proto-oncogene like 1
553	ENSG00000100650	SRSF5	serine and arginine rich splicing factor 5
554	ENSG00000257702	LBX2-AS1	LBX2 antisense RNA 1
555	ENSG00000167447	SMG8	SMG8 nonsense mediated mRNA decay factor
556	ENSG00000197530	MIB2	MIB E3 ubiquitin protein ligase 2
557	ENSG00000138448	ITGAV	integrin subunit alpha V
558	ENSG00000134363	FST	follistatin
559	ENSG00000260231	KDM7A-DT	KDM7A divergent transcript
560	ENSG00000139146	SINHCAF	SIN3-HDAC complex associated factor
561	ENSG00000072736	NFATC3	nuclear factor of activated T cells 3
562	ENSG00000131591	C1orf159	chromosome 1 open reading frame 159
563	ENSG00000196141	SPATS2L	spermatogenesis associated serine rich 2 like
564	ENSG00000196365	LONP1	lon peptidase 1, mitochondrial
565	ENSG00000197323	TRIM33	tripartite motif containing 33
566	ENSG00000272333	KMT2B	lysine methyltransferase 2B
567	ENSG00000182551	ADI1	acireductone dioxygenase 1
568	ENSG00000101019	UQCC1	ubiquinol-cytochrome c reductase complex assembly factor 1
569	ENSG00000113966	ARL6	ADP ribosylation factor like GTPase 6
570	ENSG00000104290	FZD3	frizzled class receptor 3
571	ENSG00000237441	RGL2	ral guanine nucleotide dissociation stimulator like 2
572	ENSG00000264901	MIR3616	microRNA 3616
573	ENSG00000125817	CENPB	centromere protein B
574	ENSG00000112715	VEGFA	vascular endothelial growth factor A
575	ENSG00000105854	PON2	paraoxonase 2
576	ENSG00000174840	PDE12	phosphodiesterase 12
577	ENSG00000153774	CFDP1	craniofacial development protein 1
578	ENSG00000240065	PSMB9	proteasome 20S subunit beta 9
579	ENSG00000178074	C2orf69	chromosome 2 open reading frame 69
580	ENSG00000020256	ZFP64	ZFP64 zinc finger protein
581	ENSG00000161011	SQSTM1	sequestosome 1
582	ENSG00000175198	PCCA	propionyl-CoA carboxylase subunit alpha
583	ENSG00000164104	HMGB2	high mobility group box 2
584	ENSG00000124171	PARD6B	par-6 family cell polarity regulator beta
585	ENSG00000136628	EPRS1	glutamyl-prolyl-tRNA synthetase 1
586	ENSG00000124194	GDAP1L1	ganglioside induced differentiation associated protein 1 like 1
587	ENSG00000130748	TMEM160	transmembrane protein 160
588	ENSG00000118939	UCHL3	ubiquitin C-terminal hydrolase L3
589	ENSG00000115657	ABCB6	ATP binding cassette subfamily B member 6 (Langereis blood group)
590	ENSG00000117419	ERI3	ERI1 exoribonuclease family member 3
591	ENSG00000204920	ZNF155	zinc finger protein 155
592	ENSG00000176148	TCP11L1	t-complex 11 like 1
593	ENSG00000183647	ZNF530	zinc finger protein 530
594	ENSG00000114480	GBE1	1,4-alpha-glucan branching enzyme 1
595	ENSG00000100997	ABHD12	abhydrolase domain containing 12, lysophospholipase
596	ENSG00000125841	NRSN2	neurensin 2
597	ENSG00000151655	ITIH2	inter-alpha-trypsin inhibitor heavy chain 2
598	ENSG00000116127	ALMS1	ALMS1 centrosome and basal body associated protein
599	ENSG00000100528	CNIH1	cornichon family AMPA receptor auxiliary protein 1
600	NA	NA	NA
601	ENSG00000286760	LOC100289495	uncharacterized LOC100289495
602	ENSG00000143702	CEP170	centrosomal protein 170
603	ENSG00000198917	SPOUT1	SPOUT domain containing methyltransferase 1
604	ENSG00000111671	SPSB2	splA/ryanodine receptor domain and SOCS box containing 2
605	ENSG00000114062	UBE3A	ubiquitin protein ligase E3A
606	ENSG00000115310	RTN4	reticulon 4
607	ENSG00000089685	BIRC5	baculoviral IAP repeat containing 5
608	ENSG00000118894	EEF2KMT	eukaryotic elongation factor 2 lysine methyltransferase
609	ENSG00000120694	HSPH1	heat shock protein family H (Hsp110) member 1
610	ENSG00000185100	ADSS1	adenylosuccinate synthase 1
611	ENSG00000101442	ACTR5	actin related protein 5
612	ENSG00000264115	MIR3180-4	microRNA 3180-4
613	ENSG00000100462	PRMT5	protein arginine methyltransferase 5
614	ENSG00000173418	NAA20	N-alpha-acetyltransferase 20, NatB catalytic subunit
615	ENSG00000163993	S100P	S100 calcium binding protein P
616	ENSG00000029364	SLC39A9	solute carrier family 39 member 9
617	ENSG00000048471	SNX29	sorting nexin 29
618	ENSG00000268129	LOC100289361	uncharacterized LOC100289361
619	ENSG00000130598	TNNI2	troponin I2, fast skeletal type
620	ENSG00000266074	BAHCC1	BAH domain and coiled-coil containing 1
621	ENSG00000141867	BRD4	bromodomain containing 4
622	ENSG00000167380	ZNF226	zinc finger protein 226
623	ENSG00000149922	TBX6	T-box transcription factor 6
624	ENSG00000111696	NT5DC3	5'-nucleotidase domain containing 3
625	ENSG00000113712	CSNK1A1	casein kinase 1 alpha 1
626	ENSG00000188177	ZC3H6	zinc finger CCCH-type containing 6
627	ENSG00000114654	EFCC1	EF-hand and coiled-coil domain containing 1
628	ENSG00000089902	RCOR1	REST corepressor 1
629	ENSG00000258436	RNASE12	ribonuclease A family member 12 (inactive)
630	ENSG00000261771	DNAAF4-CCPG1	DNAAF4-CCPG1 readthrough (NMD candidate)
631	ENSG00000099624	ATP5F1D	ATP synthase F1 subunit delta
632	ENSG00000101161	PRPF6	pre-mRNA processing factor 6
633	ENSG00000027697	IFNGR1	interferon gamma receptor 1
634	ENSG00000151353	TMEM18	transmembrane protein 18
635	ENSG00000168802	CHTF8	chromosome transmission fidelity factor 8
636	ENSG00000103381	CPPED1	calcineurin like phosphoesterase domain containing 1
637	ENSG00000102547	CAB39L	calcium binding protein 39 like
638	ENSG00000168003	SLC3A2	solute carrier family 3 member 2
639	ENSG00000204684	LOC284788	uncharacterized LOC284788
640	ENSG00000204947	ZNF425	zinc finger protein 425
641	ENSG00000165915	SLC39A13	solute carrier family 39 member 13
642	ENSG00000215712	TMEM242	transmembrane protein 242
643	ENSG00000118503	TNFAIP3	TNF alpha induced protein 3
644	ENSG00000166326	TRIM44	tripartite motif containing 44
645	ENSG00000263001	GTF2I	general transcription factor IIi
646	ENSG00000227165	WDR11-AS1	WDR11 antisense RNA 1
647	ENSG00000206053	JPT2	Jupiter microtubule associated homolog 2
648	ENSG00000170899	GSTA4	glutathione S-transferase alpha 4
649	ENSG00000284118	MIR4707	microRNA 4707
650	ENSG00000180992	MRPL14	mitochondrial ribosomal protein L14
651	ENSG00000204616	TRIM31	tripartite motif containing 31
652	ENSG00000157426	AASDH	aminoadipate-semialdehyde dehydrogenase
653	ENSG00000100105	PATZ1	POZ/BTB and AT hook containing zinc finger 1
654	ENSG00000122966	CIT	citron rho-interacting serine/threonine kinase
655	ENSG00000006712	PAF1	PAF1 homolog, Paf1/RNA polymerase II complex component
656	ENSG00000241058	NSUN6	NOP2/Sun RNA methyltransferase 6
657	ENSG00000166902	MRPL16	mitochondrial ribosomal protein L16
658	ENSG00000162144	CYB561A3	cytochrome b561 family member A3
659	ENSG00000203999	LINC01270	long intergenic non-protein coding RNA 1270
660	ENSG00000160299	PCNT	pericentrin
661	ENSG00000168061	SAC3D1	SAC3 domain containing 1
662	ENSG00000005100	DHX33	DEAH-box helicase 33
663	ENSG00000159216	RUNX1	RUNX family transcription factor 1
664	ENSG00000175003	SLC22A1	solute carrier family 22 member 1
665	ENSG00000239605	STPG4	sperm-tail PG-rich repeat containing 4
666	ENSG00000131375	CAPN7	calpain 7
667	ENSG00000129103	SUMF2	sulfatase modifying factor 2
668	ENSG00000128609	NDUFA5	NADH:ubiquinone oxidoreductase subunit A5
669	ENSG00000179743	FLJ37453	uncharacterized LOC729614
670	ENSG00000227036	LINC00673	long intergenic non-protein coding RNA 673
671	ENSG00000196230	TUBB	tubulin beta class I
672	ENSG00000081181	ARG2	arginase 2
673	ENSG00000102921	N4BP1	NEDD4 binding protein 1
674	ENSG00000223855	HRAT92	heart tissue-associated transcript 92
675	ENSG00000121058	COIL	coilin
676	ENSG00000145982	FARS2	phenylalanyl-tRNA synthetase 2, mitochondrial
677	ENSG00000134697	GNL2	G protein nucleolar 2
678	ENSG00000164062	APEH	acylaminoacyl-peptide hydrolase
679	ENSG00000176890	TYMS	thymidylate synthetase
680	ENSG00000157593	SLC35B2	solute carrier family 35 member B2
681	ENSG00000167986	DDB1	damage specific DNA binding protein 1
682	ENSG00000107872	FBXL15	F-box and leucine rich repeat protein 15
683	ENSG00000102934	PLLP	plasmolipin
684	ENSG00000103507	BCKDK	branched chain keto acid dehydrogenase kinase
685	ENSG00000117868	ESYT2	extended synaptotagmin 2
686	ENSG00000137806	NDUFAF1	NADH:ubiquinone oxidoreductase complex assembly factor 1
687	ENSG00000148335	NTMT1	N-terminal Xaa-Pro-Lys N-methyltransferase 1
688	ENSG00000138030	KHK	ketohexokinase
689	ENSG00000103067	ESRP2	epithelial splicing regulatory protein 2
690	ENSG00000050426	LETMD1	LETM1 domain containing 1
691	ENSG00000121931	LRIF1	ligand dependent nuclear receptor interacting factor 1
692	ENSG00000007392	LUC7L	LUC7 like
693	ENSG00000151881	TMEM267	transmembrane protein 267
694	ENSG00000108669	CYTH1	cytohesin 1
695	ENSG00000180776	ZDHHC20	zinc finger DHHC-type palmitoyltransferase 20
696	ENSG00000132155	RAF1	Raf-1 proto-oncogene, serine/threonine kinase
697	ENSG00000034152	MAP2K3	mitogen-activated protein kinase kinase 3
698	ENSG00000166783	MARF1	meiosis regulator and mRNA stability factor 1
699	ENSG00000158373	H2BC5	H2B clustered histone 5
700	ENSG00000143379	SETDB1	SET domain bifurcated histone lysine methyltransferase 1
701	ENSG00000101350	KIF3B	kinesin family member 3B
702	ENSG00000146648	EGFR	epidermal growth factor receptor
703	ENSG00000164024	METAP1	methionyl aminopeptidase 1
704	ENSG00000119596	YLPM1	YLP motif containing 1
705	ENSG00000144749	LRIG1	leucine rich repeats and immunoglobulin like domains 1
706	ENSG00000090989	EXOC1	exocyst complex component 1
707	ENSG00000160741	CRTC2	CREB regulated transcription coactivator 2
708	ENSG00000108433	GOSR2	golgi SNAP receptor complex member 2
709	ENSG00000134910	STT3A	STT3 oligosaccharyltransferase complex catalytic subunit A
710	ENSG00000154518	ATP5MC3	ATP synthase membrane subunit c locus 3
711	ENSG00000089057	SLC23A2	solute carrier family 23 member 2
712	ENSG00000112208	BAG2	BAG cochaperone 2
713	ENSG00000011198	ABHD5	abhydrolase domain containing 5, lysophosphatidic acid acyltransferase
714	ENSG00000125730	C3	complement C3
715	ENSG00000196182	STK40	serine/threonine kinase 40
716	ENSG00000175581	MRPL48	mitochondrial ribosomal protein L48
717	ENSG00000137770	CTDSPL2	CTD small phosphatase like 2
718	ENSG00000184470	TXNRD2	thioredoxin reductase 2
719	ENSG00000243660	ZNF487	zinc finger protein 487
720	ENSG00000136051	WASHC4	WASH complex subunit 4
721	ENSG00000077312	SNRPA	small nuclear ribonucleoprotein polypeptide A
722	ENSG00000124444	ZNF576	zinc finger protein 576
723	ENSG00000173137	ADCK5	aarF domain containing kinase 5
724	NA	CRYM-AS1	CRYM antisense RNA 1
725	ENSG00000162604	TM2D1	TM2 domain containing 1
726	ENSG00000141425	RPRD1A	regulation of nuclear pre-mRNA domain containing 1A
727	ENSG00000136193	SCRN1	secernin 1
728	ENSG00000259974	LINC00261	long intergenic non-protein coding RNA 261
729	ENSG00000127080	IPPK	inositol-pentakisphosphate 2-kinase
730	ENSG00000207181	SNORA14B	small nucleolar RNA, H/ACA box 14B
731	ENSG00000159200	RCAN1	regulator of calcineurin 1
732	ENSG00000178104	PDE4DIP	phosphodiesterase 4D interacting protein
733	ENSG00000114770	ABCC5	ATP binding cassette subfamily C member 5
734	ENSG00000196155	PLEKHG4	pleckstrin homology and RhoGEF domain containing G4
735	ENSG00000166794	PPIB	peptidylprolyl isomerase B
736	ENSG00000125166	GOT2	glutamic-oxaloacetic transaminase 2
737	ENSG00000140694	PARN	poly(A)-specific ribonuclease
738	ENSG00000129933	MAU2	MAU2 sister chromatid cohesion factor
739	ENSG00000056097	ZFR	zinc finger RNA binding protein
740	ENSG00000172081	MOB3A	MOB kinase activator 3A
741	ENSG00000122696	SLC25A51	solute carrier family 25 member 51
742	ENSG00000150995	ITPR1	inositol 1,4,5-trisphosphate receptor type 1
743	ENSG00000164442	CITED2	Cbp/p300 interacting transactivator with Glu/Asp rich carboxy-terminal domain 2
744	ENSG00000131351	HAUS8	HAUS augmin like complex subunit 8
745	ENSG00000197119	SLC25A29	solute carrier family 25 member 29
746	ENSG00000113119	TMCO6	transmembrane and coiled-coil domains 6
747	ENSG00000133935	ERG28	ergosterol biosynthesis 28 homolog
748	ENSG00000126218	F10	coagulation factor X
749	ENSG00000125398	SOX9	SRY-box transcription factor 9
750	NA	LINC01135	long intergenic non-protein coding RNA 1135
751	ENSG00000173638	SLC19A1	solute carrier family 19 member 1
752	ENSG00000179943	FIZ1	FLT3 interacting zinc finger 1
753	ENSG00000157326	DHRS4	dehydrogenase/reductase 4
754	ENSG00000119335	SET	SET nuclear proto-oncogene
755	ENSG00000265822	MIR4422	microRNA 4422
756	NA	KDM4A-AS1	KDM4A antisense RNA 1
757	ENSG00000227630	LINC01132	long intergenic non-protein coding RNA 1132
758	ENSG00000116731	PRDM2	PR/SET domain 2
759	ENSG00000180712	LINC02363	long intergenic non-protein coding RNA 2363
760	ENSG00000130649	CYP2E1	cytochrome P450 family 2 subfamily E member 1
761	ENSG00000135018	UBQLN1	ubiquilin 1
762	ENSG00000156860	FBRS	fibrosin
763	ENSG00000078487	ZCWPW1	zinc finger CW-type and PWWP domain containing 1
764	ENSG00000157800	SLC37A3	solute carrier family 37 member 3
765	ENSG00000147416	ATP6V1B2	ATPase H+ transporting V1 subunit B2
766	ENSG00000125651	GTF2F1	general transcription factor IIF subunit 1
767	ENSG00000115758	ODC1	ornithine decarboxylase 1
768	ENSG00000220008	LINGO3	leucine rich repeat and Ig domain containing 3
769	ENSG00000181222	POLR2A	RNA polymerase II subunit A
770	ENSG00000168488	ATXN2L	ataxin 2 like
771	ENSG00000158104	HPD	4-hydroxyphenylpyruvate dioxygenase
772	ENSG00000178996	SNX18	sorting nexin 18
773	ENSG00000198034	RPS4X	ribosomal protein S4 X-linked
774	ENSG00000165283	STOML2	stomatin like 2
775	NA	SUMO1P1	SUMO1 pseudogene 1
776	ENSG00000257008	GPR142	G protein-coupled receptor 142
777	ENSG00000155034	FBXL18	F-box and leucine rich repeat protein 18
778	ENSG00000264408	MIR4470	microRNA 4470
779	ENSG00000139291	TMEM19	transmembrane protein 19
780	ENSG00000176170	SPHK1	sphingosine kinase 1
781	ENSG00000163636	PSMD6	proteasome 26S subunit, non-ATPase 6
782	ENSG00000172009	THOP1	thimet oligopeptidase 1
783	ENSG00000104886	PLEKHJ1	pleckstrin homology domain containing J1
784	ENSG00000047932	GOPC	golgi associated PDZ and coiled-coil motif containing
785	NA	LOC100130872	uncharacterized LOC100130872
786	ENSG00000175567	UCP2	uncoupling protein 2
787	ENSG00000141582	CBX4	chromobox 4
788	ENSG00000264395	MIR3193	microRNA 3193
789	NA	LOC100294145	uncharacterized LOC100294145
790	ENSG00000269821	KCNQ1OT1	KCNQ1 opposite strand/antisense transcript 1
791	ENSG00000170791	CHCHD7	coiled-coil-helix-coiled-coil-helix domain containing 7
792	ENSG00000115306	SPTBN1	spectrin beta, non-erythrocytic 1
793	ENSG00000159322	ADPGK	ADP dependent glucokinase
794	ENSG00000141232	TOB1	transducer of ERBB2, 1
795	ENSG00000167680	SEMA6B	semaphorin 6B
796	ENSG00000081154	PCNP	PEST proteolytic signal containing nuclear protein
797	ENSG00000071794	HLTF	helicase like transcription factor
798	ENSG00000215154	LOC652276	potassium channel tetramerization domain containing 5 pseudogene
799	ENSG00000196214	ZNF766	zinc finger protein 766
800	ENSG00000227268	KLLN	killin, p53 regulated DNA replication inhibitor
801	ENSG00000259075	POC1B-GALNT4	POC1B-GALNT4 readthrough
802	ENSG00000168734	PKIG	cAMP-dependent protein kinase inhibitor gamma
803	ENSG00000187109	NAP1L1	nucleosome assembly protein 1 like 1
804	ENSG00000183735	TBK1	TANK binding kinase 1
805	ENSG00000163032	VSNL1	visinin like 1
806	ENSG00000116035	VAX2	ventral anterior homeobox 2
807	ENSG00000100065	CARD10	caspase recruitment domain family member 10
808	ENSG00000259024	TVP23C-CDRT4	TVP23C-CDRT4 readthrough
809	ENSG00000133393	CEP20	centrosomal protein 20
810	ENSG00000198855	FICD	FIC domain protein adenylyltransferase
811	ENSG00000276725	CEP170P1	centrosomal protein 170 pseudogene 1
812	ENSG00000137807	KIF23	kinesin family member 23
813	NA	EEF1E1-BLOC1S5	EEF1E1-BLOC1S5 readthrough (NMD candidate)
814	ENSG00000213782	DDX47	DEAD-box helicase 47
815	ENSG00000110801	PSMD9	proteasome 26S subunit, non-ATPase 9
816	ENSG00000141664	ZCCHC2	zinc finger CCHC-type containing 2
817	ENSG00000005020	SKAP2	src kinase associated phosphoprotein 2
818	ENSG00000173334	TRIB1	tribbles pseudokinase 1
819	ENSG00000198894	CIPC	CLOCK interacting pacemaker
820	ENSG00000115919	KYNU	kynureninase
821	ENSG00000136720	HS6ST1	heparan sulfate 6-O-sulfotransferase 1
822	ENSG00000186458	DEFB132	defensin beta 132
823	ENSG00000138801	PAPSS1	3'-phosphoadenosine 5'-phosphosulfate synthase 1
824	ENSG00000256087	ZNF432	zinc finger protein 432
825	ENSG00000199165	MIRLET7A1	microRNA let-7a-1
826	ENSG00000166484	MAPK7	mitogen-activated protein kinase 7
827	ENSG00000077782	FGFR1	fibroblast growth factor receptor 1
828	ENSG00000186918	ZNF395	zinc finger protein 395
829	ENSG00000110047	EHD1	EH domain containing 1
830	ENSG00000147872	PLIN2	perilipin 2
831	ENSG00000264763	MIR4295	microRNA 4295
832	ENSG00000100401	RANGAP1	Ran GTPase activating protein 1
833	ENSG00000108176	DNAJC12	DnaJ heat shock protein family (Hsp40) member C12
834	ENSG00000116863	ADPRS	ADP-ribosylserine hydrolase
835	ENSG00000105516	DBP	D-box binding PAR bZIP transcription factor
836	ENSG00000092010	PSME1	proteasome activator subunit 1
837	ENSG00000132510	KDM6B	lysine demethylase 6B
838	ENSG00000149346	SLX4IP	SLX4 interacting protein
839	ENSG00000174231	PRPF8	pre-mRNA processing factor 8
840	ENSG00000006607	FARP2	FERM, ARH/RhoGEF and pleckstrin domain protein 2
841	ENSG00000135837	CEP350	centrosomal protein 350
842	ENSG00000198087	CD2AP	CD2 associated protein
843	ENSG00000164105	SAP30	Sin3A associated protein 30
844	ENSG00000184508	HDDC3	HD domain containing 3
845	ENSG00000164663	USP49	ubiquitin specific peptidase 49
846	ENSG00000169087	HSPBAP1	HSPB1 associated protein 1
847	ENSG00000181396	OGFOD3	2-oxoglutarate and iron dependent oxygenase domain containing 3
848	ENSG00000148835	TAF5	TATA-box binding protein associated factor 5
849	ENSG00000182628	SKA2	spindle and kinetochore associated complex subunit 2
850	ENSG00000233016	SNHG7	small nucleolar RNA host gene 7
851	ENSG00000130826	DKC1	dyskerin pseudouridine synthase 1
852	ENSG00000178252	WDR6	WD repeat domain 6
853	ENSG00000179094	PER1	period circadian regulator 1
854	ENSG00000108654	DDX5	DEAD-box helicase 5
855	NA	SPAG5-AS1	SPAG5 antisense RNA 1
856	ENSG00000281706	LINC01012	long intergenic non-protein coding RNA 1012
857	ENSG00000101182	PSMA7	proteasome 20S subunit alpha 7
858	ENSG00000119508	NR4A3	nuclear receptor subfamily 4 group A member 3
859	ENSG00000196233	LCOR	ligand dependent nuclear receptor corepressor
860	ENSG00000176909	MAMSTR	MEF2 activating motif and SAP domain containing transcriptional regulator
861	ENSG00000172216	CEBPB	CCAAT enhancer binding protein beta
862	ENSG00000152700	SAR1B	secretion associated Ras related GTPase 1B
863	ENSG00000163312	HELQ	helicase, POLQ like
864	ENSG00000170892	TSEN34	tRNA splicing endonuclease subunit 34
865	ENSG00000078618	NRDC	nardilysin convertase
866	ENSG00000188779	SKOR1	SKI family transcriptional corepressor 1
867	NA	LINC01004	long intergenic non-protein coding RNA 1004
868	ENSG00000163463	KRTCAP2	keratinocyte associated protein 2
869	ENSG00000100815	TRIP11	thyroid hormone receptor interactor 11
870	ENSG00000054793	ATP9A	ATPase phospholipid transporting 9A (putative)
871	ENSG00000111850	SMIM8	small integral membrane protein 8
872	ENSG00000110048	OSBP	oxysterol binding protein
873	ENSG00000143164	DCAF6	DDB1 and CUL4 associated factor 6
874	ENSG00000186352	ANKRD37	ankyrin repeat domain 37
875	ENSG00000213398	LCAT	lecithin-cholesterol acyltransferase
876	ENSG00000184922	FMNL1	formin like 1
877	ENSG00000125844	RRBP1	ribosome binding protein 1
878	ENSG00000196605	ZNF846	zinc finger protein 846
879	ENSG00000165609	NUDT5	nudix hydrolase 5
880	ENSG00000164124	TMEM144	transmembrane protein 144
881	ENSG00000239474	KLHL41	kelch like family member 41
882	ENSG00000163482	STK36	serine/threonine kinase 36
883	ENSG00000109118	PHF12	PHD finger protein 12
884	ENSG00000117461	PIK3R3	phosphoinositide-3-kinase regulatory subunit 3
885	ENSG00000138785	INTS12	integrator complex subunit 12
886	ENSG00000136932	TRMO	tRNA methyltransferase O
887	ENSG00000154252	GAL3ST2	galactose-3-O-sulfotransferase 2
888	ENSG00000110422	HIPK3	homeodomain interacting protein kinase 3
889	ENSG00000169193	CCDC126	coiled-coil domain containing 126
890	ENSG00000145041	DCAF1	DDB1 and CUL4 associated factor 1
891	ENSG00000161203	AP2M1	adaptor related protein complex 2 subunit mu 1
892	ENSG00000132842	AP3B1	adaptor related protein complex 3 subunit beta 1
893	ENSG00000128310	GALR3	galanin receptor 3
894	ENSG00000187244	BCAM	basal cell adhesion molecule (Lutheran blood group)
895	ENSG00000173406	DAB1	DAB adaptor protein 1
896	ENSG00000146521	LINC01558	long intergenic non-protein coding RNA 1558
897	ENSG00000125812	GZF1	GDNF inducible zinc finger protein 1
898	ENSG00000196683	TOMM7	translocase of outer mitochondrial membrane 7
899	ENSG00000130706	ADRM1	ADRM1 26S proteasome ubiquitin receptor
900	ENSG00000076984	MAP2K7	mitogen-activated protein kinase kinase 7
901	ENSG00000135624	CCT7	chaperonin containing TCP1 subunit 7
902	ENSG00000253741	LNCOC1	lncRNA associated with ovarian cancer 1
903	ENSG00000011260	UTP18	UTP18 small subunit processome component
904	ENSG00000163867	ZMYM6	zinc finger MYM-type containing 6
905	ENSG00000111206	FOXM1	forkhead box M1
906	ENSG00000125877	ITPA	inosine triphosphatase
907	ENSG00000240344	PPIL3	peptidylprolyl isomerase like 3
908	ENSG00000115137	DNAJC27	DnaJ heat shock protein family (Hsp40) member C27
909	ENSG00000116044	NFE2L2	nuclear factor, erythroid 2 like 2
910	ENSG00000143952	VPS54	VPS54 subunit of GARP complex
911	ENSG00000130309	COLGALT1	collagen beta(1-O)galactosyltransferase 1
912	ENSG00000176476	SGF29	SAGA complex associated factor 29
913	ENSG00000204954	C12orf73	chromosome 12 open reading frame 73
914	ENSG00000221261	MIR1208	microRNA 1208
915	ENSG00000163848	ZNF148	zinc finger protein 148
916	ENSG00000080608	PUM3	pumilio RNA binding family member 3
917	ENSG00000143207	COP1	COP1 E3 ubiquitin ligase
918	ENSG00000196378	ZNF34	zinc finger protein 34
919	ENSG00000160908	ZNF394	zinc finger protein 394
920	ENSG00000176401	EID2B	EP300 interacting inhibitor of differentiation 2B
921	ENSG00000117625	RCOR3	REST corepressor 3
922	ENSG00000146540	C7orf50	chromosome 7 open reading frame 50
923	ENSG00000104472	CHRAC1	chromatin accessibility complex subunit 1
924	ENSG00000125741	OPA3	outer mitochondrial membrane lipid metabolism regulator OPA3
925	ENSG00000205937	RNPS1	RNA binding protein with serine rich domain 1
926	ENSG00000196782	MAML3	mastermind like transcriptional coactivator 3
927	ENSG00000023318	ERP44	endoplasmic reticulum protein 44
928	ENSG00000178821	TMEM52	transmembrane protein 52
929	ENSG00000078269	SYNJ2	synaptojanin 2
930	ENSG00000035115	SH3YL1	SH3 and SYLF domain containing 1
931	ENSG00000173207	CKS1B	CDC28 protein kinase regulatory subunit 1B
932	ENSG00000196911	KPNA5	karyopherin subunit alpha 5
933	ENSG00000170852	KBTBD2	kelch repeat and BTB domain containing 2
934	ENSG00000174197	MGA	MAX dimerization protein MGA
935	ENSG00000010539	ZNF200	zinc finger protein 200
936	ENSG00000178096	BOLA1	bolA family member 1
937	ENSG00000146731	CCT6A	chaperonin containing TCP1 subunit 6A
938	ENSG00000141338	ABCA8	ATP binding cassette subfamily A member 8
939	ENSG00000128039	SRD5A3	steroid 5 alpha-reductase 3
940	ENSG00000178209	PLEC	plectin
941	ENSG00000138587	MNS1	meiosis specific nuclear structural 1
942	ENSG00000177954	RPS27	ribosomal protein S27
943	ENSG00000166889	PATL1	PAT1 homolog 1, processing body mRNA decay factor
944	ENSG00000165097	KDM1B	lysine demethylase 1B
945	ENSG00000006757	PNPLA4	patatin like phospholipase domain containing 4
946	ENSG00000143376	SNX27	sorting nexin 27
947	ENSG00000160957	RECQL4	RecQ like helicase 4
948	ENSG00000225778	PROSER2-AS1	PROSER2 antisense RNA 1
949	ENSG00000278705	H4C2	H4 clustered histone 2
950	ENSG00000076685	NT5C2	5'-nucleotidase, cytosolic II
951	ENSG00000101413	RPRD1B	regulation of nuclear pre-mRNA domain containing 1B
952	ENSG00000120662	MTRF1	mitochondrial translation release factor 1
953	ENSG00000134851	TMEM165	transmembrane protein 165
954	ENSG00000229589	ACVR2B-AS1	ACVR2B antisense RNA 1
955	ENSG00000197912	SPG7	SPG7 matrix AAA peptidase subunit, paraplegin
956	ENSG00000214193	SH3D21	SH3 domain containing 21
957	ENSG00000170425	ADORA2B	adenosine A2b receptor
958	ENSG00000143924	EML4	EMAP like 4
959	ENSG00000129691	ASH2L	ASH2 like, histone lysine methyltransferase complex subunit
960	ENSG00000145912	NHP2	NHP2 ribonucleoprotein
961	ENSG00000185513	L3MBTL1	L3MBTL histone methyl-lysine binding protein 1
962	ENSG00000144579	CTDSP1	CTD small phosphatase 1
963	ENSG00000019186	CYP24A1	cytochrome P450 family 24 subfamily A member 1
964	ENSG00000141503	MINK1	misshapen like kinase 1
965	ENSG00000115594	IL1R1	interleukin 1 receptor type 1
966	ENSG00000166352	IFTAP	intraflagellar transport associated protein
967	ENSG00000072803	FBXW11	F-box and WD repeat domain containing 11
968	ENSG00000102189	EEA1	early endosome antigen 1
969	ENSG00000182272	B4GALNT4	beta-1,4-N-acetyl-galactosaminyltransferase 4
970	ENSG00000088832	FKBP1A	FKBP prolyl isomerase 1A
971	ENSG00000135045	C9orf40	chromosome 9 open reading frame 40
972	ENSG00000197157	SND1	staphylococcal nuclease and tudor domain containing 1
973	ENSG00000123144	TRIR	telomerase RNA component interacting RNase
974	ENSG00000248008	NRAV	negative regulator of antiviral response
975	ENSG00000146066	HIGD2A	HIG1 hypoxia inducible domain family member 2A
976	ENSG00000129472	RAB2B	RAB2B, member RAS oncogene family
977	ENSG00000165115	KIF27	kinesin family member 27
978	ENSG00000170604	IRF2BP1	interferon regulatory factor 2 binding protein 1
979	ENSG00000153914	SREK1	splicing regulatory glutamic acid and lysine rich protein 1
980	ENSG00000155506	LARP1	La ribonucleoprotein 1, translational regulator
981	ENSG00000184226	PCDH9	protocadherin 9
982	ENSG00000125967	NECAB3	N-terminal EF-hand calcium binding protein 3
983	ENSG00000132855	ANGPTL3	angiopoietin like 3
984	ENSG00000169018	FEM1B	fem-1 homolog B
985	ENSG00000184640	SEPTIN9	septin 9
986	ENSG00000178386	ZNF223	zinc finger protein 223
987	ENSG00000171490	RSL1D1	ribosomal L1 domain containing 1
988	ENSG00000204574	ABCF1	ATP binding cassette subfamily F member 1
989	ENSG00000077684	JADE1	jade family PHD finger 1
990	ENSG00000103460	TOX3	TOX high mobility group box family member 3
991	ENSG00000110218	PANX1	pannexin 1
992	ENSG00000110074	FOXRED1	FAD dependent oxidoreductase domain containing 1
993	ENSG00000116604	MEF2D	myocyte enhancer factor 2D
994	ENSG00000164465	DCBLD1	discoidin, CUB and LCCL domain containing 1
995	ENSG00000257365	FNTB	farnesyltransferase, CAAX box, beta
996	ENSG00000147894	C9orf72	C9orf72-SMCR8 complex subunit
997	ENSG00000089154	GCN1	GCN1 activator of EIF2AK4
998	ENSG00000108439	PNPO	pyridoxamine 5'-phosphate oxidase
999	ENSG00000268061	NAPA-AS1	NAPA antisense RNA 1
1000	ENSG00000112658	SRF	serum response factor
1001	ENSG00000177485	ZBTB33	zinc finger and BTB domain containing 33
1002	ENSG00000204220	PFDN6	prefoldin subunit 6
1003	ENSG00000111859	NEDD9	neural precursor cell expressed, developmentally down-regulated 9
1004	ENSG00000182952	HMGN4	high mobility group nucleosomal binding domain 4
1005	NA	PXN-AS1	PXN antisense RNA 1
1006	ENSG00000132394	EEFSEC	eukaryotic elongation factor, selenocysteine-tRNA specific
1007	ENSG00000273045	C2orf15	chromosome 2 open reading frame 15
1008	ENSG00000168509	HJV	hemojuvelin BMP co-receptor
1009	ENSG00000171150	SOCS5	suppressor of cytokine signaling 5
1010	ENSG00000119321	FKBP15	FKBP prolyl isomerase family member 15
1011	ENSG00000137642	SORL1	sortilin related receptor 1
1012	ENSG00000146049	KAAG1	kidney associated antigen 1
1013	ENSG00000064313	TAF2	TATA-box binding protein associated factor 2
1014	ENSG00000226950	DANCR	differentiation antagonizing non-protein coding RNA
1015	ENSG00000130590	SAMD10	sterile alpha motif domain containing 10
1016	ENSG00000277363	SRCIN1	SRC kinase signaling inhibitor 1
1017	ENSG00000280278	FLJ30679	uncharacterized protein FLJ30679
1018	ENSG00000143486	EIF2D	eukaryotic translation initiation factor 2D
1019	ENSG00000102805	CLN5	CLN5 intracellular trafficking protein
1020	ENSG00000101236	RNF24	ring finger protein 24
1021	ENSG00000181284	TMEM102	transmembrane protein 102
1022	ENSG00000197223	C1D	C1D nuclear receptor corepressor
1023	ENSG00000146416	AIG1	androgen induced 1
1024	ENSG00000263857	MIR4729	microRNA 4729
1025	ENSG00000118960	HS1BP3	HCLS1 binding protein 3
1026	ENSG00000137073	UBAP2	ubiquitin associated protein 2
1027	ENSG00000136731	UGGT1	UDP-glucose glycoprotein glucosyltransferase 1
1028	ENSG00000173653	RCE1	Ras converting CAAX endopeptidase 1
1029	ENSG00000177917	ARL6IP6	ADP ribosylation factor like GTPase 6 interacting protein 6
1030	ENSG00000198728	LDB1	LIM domain binding 1
1031	ENSG00000120696	KBTBD7	kelch repeat and BTB domain containing 7
1032	ENSG00000180370	PAK2	p21 (RAC1) activated kinase 2
1033	ENSG00000013392	RWDD2A	RWD domain containing 2A
1034	ENSG00000145782	ATG12	autophagy related 12
1035	ENSG00000132664	POLR3F	RNA polymerase III subunit F
1036	ENSG00000120333	MRPS14	mitochondrial ribosomal protein S14
1037	ENSG00000158545	ZC3H18	zinc finger CCCH-type containing 18
1038	ENSG00000105738	SIPA1L3	signal induced proliferation associated 1 like 3
1039	ENSG00000172888	ZNF621	zinc finger protein 621
1040	ENSG00000266412	NCOA4	nuclear receptor coactivator 4
1041	ENSG00000115464	USP34	ubiquitin specific peptidase 34
1042	ENSG00000136152	COG3	component of oligomeric golgi complex 3
1043	ENSG00000153827	TRIP12	thyroid hormone receptor interactor 12
1044	ENSG00000108389	MTMR4	myotubularin related protein 4
1045	ENSG00000250722	SELENOP	selenoprotein P
1046	ENSG00000271270	TMCC1-DT	TMCC1 divergent transcript
1047	ENSG00000008838	MED24	mediator complex subunit 24
1048	ENSG00000167083	GNGT2	G protein subunit gamma transducin 2
1049	ENSG00000068394	GPKOW	G-patch domain and KOW motifs
1050	ENSG00000162599	NFIA	nuclear factor I A
1051	ENSG00000198589	LRBA	LPS responsive beige-like anchor protein
1052	ENSG00000283863	MIR3960	microRNA 3960
1053	ENSG00000135597	REPS1	RALBP1 associated Eps domain containing 1
1054	ENSG00000101194	SLC17A9	solute carrier family 17 member 9
1055	ENSG00000099968	BCL2L13	BCL2 like 13
1056	ENSG00000167671	UBXN6	UBX domain protein 6
1057	ENSG00000170860	LSM3	LSM3 homolog, U6 small nuclear RNA and mRNA degradation associated
1058	ENSG00000106771	TMEM245	transmembrane protein 245
1059	ENSG00000171552	BCL2L1	BCL2 like 1
1060	ENSG00000165660	ABRAXAS2	abraxas 2, BRISC complex subunit
1061	ENSG00000176390	CRLF3	cytokine receptor like factor 3
1062	ENSG00000177728	TMEM94	transmembrane protein 94
1063	ENSG00000152932	RAB3C	RAB3C, member RAS oncogene family
1064	ENSG00000181773	GPR3	G protein-coupled receptor 3
1065	ENSG00000185963	BICD2	BICD cargo adaptor 2
1066	ENSG00000198131	ZNF544	zinc finger protein 544
1067	ENSG00000164037	SLC9B1	solute carrier family 9 member B1
1068	ENSG00000132670	PTPRA	protein tyrosine phosphatase receptor type A
1069	ENSG00000169155	ZBTB43	zinc finger and BTB domain containing 43
1070	ENSG00000135316	SYNCRIP	synaptotagmin binding cytoplasmic RNA interacting protein
1071	ENSG00000157500	APPL1	adaptor protein, phosphotyrosine interacting with PH domain and leucine zipper 1
1072	ENSG00000120438	TCP1	t-complex 1
1073	ENSG00000001630	CYP51A1	cytochrome P450 family 51 subfamily A member 1
1074	ENSG00000074603	DPP8	dipeptidyl peptidase 8
1075	ENSG00000139668	WDFY2	WD repeat and FYVE domain containing 2
1076	ENSG00000157191	NECAP2	NECAP endocytosis associated 2
1077	ENSG00000089177	KIF16B	kinesin family member 16B
1078	ENSG00000205670	SMIM11A	small integral membrane protein 11A
1079	ENSG00000106069	CHN2	chimerin 2
1080	ENSG00000196781	TLE1	TLE family member 1, transcriptional corepressor
1081	ENSG00000148719	DNAJB12	DnaJ heat shock protein family (Hsp40) member B12
1082	ENSG00000099875	MKNK2	MAPK interacting serine/threonine kinase 2
1083	ENSG00000129055	ANAPC13	anaphase promoting complex subunit 13
1084	ENSG00000170144	HNRNPA3	heterogeneous nuclear ribonucleoprotein A3
1085	ENSG00000113838	TBCCD1	TBCC domain containing 1
1086	ENSG00000251562	MALAT1	metastasis associated lung adenocarcinoma transcript 1
1087	ENSG00000177830	CHID1	chitinase domain containing 1
1088	ENSG00000157895	C12orf43	chromosome 12 open reading frame 43
1089	ENSG00000103257	SLC7A5	solute carrier family 7 member 5
1090	ENSG00000204568	MRPS18B	mitochondrial ribosomal protein S18B
1091	ENSG00000179673	RPRML	reprimo like
1092	ENSG00000248593	DSTNP2	DSTN pseudogene 2
1093	ENSG00000163607	GTPBP8	GTP binding protein 8 (putative)
1094	ENSG00000114391	RPL24	ribosomal protein L24
1095	ENSG00000104419	NDRG1	N-myc downstream regulated 1
1096	ENSG00000077238	IL4R	interleukin 4 receptor
1097	ENSG00000020577	SAMD4A	sterile alpha motif domain containing 4A
1098	ENSG00000146216	TTBK1	tau tubulin kinase 1
1099	ENSG00000002016	RAD52	RAD52 homolog, DNA repair protein
1100	ENSG00000182858	ALG12	ALG12 alpha-1,6-mannosyltransferase
1101	ENSG00000172046	USP19	ubiquitin specific peptidase 19
1102	ENSG00000214736	TOMM6	translocase of outer mitochondrial membrane 6
1103	ENSG00000100307	CBX7	chromobox 7
1104	ENSG00000198939	ZFP2	ZFP2 zinc finger protein
1105	ENSG00000163586	FABP1	fatty acid binding protein 1
1106	ENSG00000104760	FGL1	fibrinogen like 1
1107	ENSG00000164896	FASTK	Fas activated serine/threonine kinase
1108	ENSG00000139218	SCAF11	SR-related CTD associated factor 11
1109	ENSG00000112624	BICRAL	BRD4 interacting chromatin remodeling complex associated protein like
1110	ENSG00000164414	SLC35A1	solute carrier family 35 member A1
1111	ENSG00000065526	SPEN	spen family transcriptional repressor
1112	ENSG00000134780	DAGLA	diacylglycerol lipase alpha
1113	ENSG00000112592	TBP	TATA-box binding protein
1114	ENSG00000143543	JTB	jumping translocation breakpoint
1115	ENSG00000120889	TNFRSF10B	TNF receptor superfamily member 10b
1116	ENSG00000162924	REL	REL proto-oncogene, NF-kB subunit
1117	ENSG00000099381	SETD1A	SET domain containing 1A, histone lysine methyltransferase
1118	ENSG00000168763	CNNM3	cyclin and CBS domain divalent metal cation transport mediator 3
1119	ENSG00000169926	KLF13	Kruppel like factor 13
1120	ENSG00000274487	NPEPPSP1	NPEPPS pseudogene 1
1121	ENSG00000142657	PGD	phosphogluconate dehydrogenase
1122	ENSG00000028528	SNX1	sorting nexin 1
1123	ENSG00000142669	SH3BGRL3	SH3 domain binding glutamate rich protein like 3
1124	ENSG00000115241	PPM1G	protein phosphatase, Mg2+/Mn2+ dependent 1G
1125	ENSG00000140836	ZFHX3	zinc finger homeobox 3
1126	ENSG00000141499	WRAP53	WD repeat containing antisense to TP53
1127	ENSG00000189099	PRSS48	serine protease 48
1128	ENSG00000178974	FBXO34	F-box protein 34
1129	ENSG00000185920	PTCH1	patched 1
1130	ENSG00000266232	MIR3178	microRNA 3178
1131	ENSG00000165804	ZNF219	zinc finger protein 219
1132	ENSG00000239219	LOC100128164	four and a half LIM domains 1 pseudogene
1133	ENSG00000025772	TOMM34	translocase of outer mitochondrial membrane 34
1134	ENSG00000131791	PRKAB2	protein kinase AMP-activated non-catalytic subunit beta 2
1135	ENSG00000145293	ENOPH1	enolase-phosphatase 1
1136	ENSG00000149823	VPS51	VPS51 subunit of GARP complex
1137	ENSG00000128607	KLHDC10	kelch domain containing 10
1138	ENSG00000102158	MAGT1	magnesium transporter 1
1139	ENSG00000103496	STX4	syntaxin 4
1140	ENSG00000206630	SNORD60	small nucleolar RNA, C/D box 60
1141	NA	BABAM2-AS1	BABAM2 antisense RNA 1
1142	ENSG00000164142	FHIP1A	FHF complex subunit HOOK interacting protein 1A
1143	ENSG00000177034	MTX3	metaxin 3
1144	ENSG00000130147	SH3BP4	SH3 domain binding protein 4
1145	ENSG00000197122	SRC	SRC proto-oncogene, non-receptor tyrosine kinase
1146	ENSG00000116922	C1orf109	chromosome 1 open reading frame 109
1147	ENSG00000162664	ZNF326	zinc finger protein 326
1148	ENSG00000171703	TCEA2	transcription elongation factor A2
1149	ENSG00000182504	CEP97	centrosomal protein 97
1150	ENSG00000159202	UBE2Z	ubiquitin conjugating enzyme E2 Z
1151	ENSG00000197444	OGDHL	oxoglutarate dehydrogenase L
1152	ENSG00000153250	RBMS1	RNA binding motif single stranded interacting protein 1
1153	ENSG00000122873	CISD1	CDGSH iron sulfur domain 1
1154	ENSG00000203705	TATDN3	TatD DNase domain containing 3
1155	ENSG00000172175	MALT1	MALT1 paracaspase
1156	ENSG00000101361	NOP56	NOP56 ribonucleoprotein
1157	ENSG00000109270	LAMTOR3	late endosomal/lysosomal adaptor, MAPK and MTOR activator 3
1158	ENSG00000153975	ZUP1	zinc finger containing ubiquitin peptidase 1
1159	ENSG00000105197	TIMM50	translocase of inner mitochondrial membrane 50
1160	ENSG00000207647	MIR153-1	microRNA 153-1
1161	ENSG00000123349	PFDN5	prefoldin subunit 5
1162	ENSG00000224470	ATXN1L	ataxin 1 like
1163	ENSG00000139546	TARBP2	TARBP2 subunit of RISC loading complex
1164	ENSG00000074800	ENO1	enolase 1
1165	ENSG00000197362	ZNF786	zinc finger protein 786
1166	ENSG00000080845	DLGAP4	DLG associated protein 4
1167	ENSG00000162341	TPCN2	two pore segment channel 2
1168	ENSG00000155275	TRMT44	tRNA methyltransferase 44 homolog
1169	ENSG00000140382	HMG20A	high mobility group 20A
1170	ENSG00000090447	TFAP4	transcription factor AP-4
1171	ENSG00000136444	RSAD1	radical S-adenosyl methionine domain containing 1
1172	ENSG00000186715	MST1L	macrophage stimulating 1 like (pseudogene)
1173	ENSG00000005102	MEOX1	mesenchyme homeobox 1
1174	ENSG00000106701	FSD1L	fibronectin type III and SPRY domain containing 1 like
1175	ENSG00000185269	NOTUM	notum, palmitoleoyl-protein carboxylesterase
1176	ENSG00000166855	CLPX	caseinolytic mitochondrial matrix peptidase chaperone subunit X
1177	ENSG00000244184	LOC101559451	uncharacterized LOC101559451
1178	ENSG00000100106	TRIOBP	TRIO and F-actin binding protein
1179	ENSG00000006125	AP2B1	adaptor related protein complex 2 subunit beta 1
1180	ENSG00000168883	USP39	ubiquitin specific peptidase 39
1181	ENSG00000181789	COPG1	COPI coat complex subunit gamma 1
1182	ENSG00000155755	TMEM237	transmembrane protein 237
1183	ENSG00000100934	SEC23A	SEC23 homolog A, COPII coat complex component
1184	ENSG00000118420	UBE3D	ubiquitin protein ligase E3D
1185	ENSG00000207967	MIR620	microRNA 620
1186	ENSG00000100324	TAB1	TGF-beta activated kinase 1 (MAP3K7) binding protein 1
1187	ENSG00000170296	GABARAP	GABA type A receptor-associated protein
1188	ENSG00000122545	SEPTIN7	septin 7
1189	ENSG00000196600	SLC22A25	solute carrier family 22 member 25
1190	ENSG00000175866	BAIAP2	BAR/IMD domain containing adaptor protein 2
1191	ENSG00000188549	CCDC9B	coiled-coil domain containing 9B
1192	ENSG00000124380	SNRNP27	small nuclear ribonucleoprotein U4/U6.U5 subunit 27
1193	ENSG00000275221	H2AC15	H2A clustered histone 15
1194	ENSG00000104388	RAB2A	RAB2A, member RAS oncogene family
1195	ENSG00000161847	RAVER1	ribonucleoprotein, PTB binding 1
1196	ENSG00000143771	CNIH4	cornichon family AMPA receptor auxiliary protein 4
1197	ENSG00000198952	SMG5	SMG5 nonsense mediated mRNA decay factor
1198	ENSG00000137166	FOXP4	forkhead box P4
1199	ENSG00000090263	MRPS33	mitochondrial ribosomal protein S33
1200	ENSG00000180596	H2BC4	H2B clustered histone 4
1201	ENSG00000118518	RNF146	ring finger protein 146
1202	ENSG00000119707	RBM25	RNA binding motif protein 25
1203	ENSG00000284015	MIR1281	microRNA 1281
1204	ENSG00000099942	CRKL	CRK like proto-oncogene, adaptor protein
1205	ENSG00000117174	ZNHIT6	zinc finger HIT-type containing 6
1206	ENSG00000146109	ABT1	activator of basal transcription 1
1207	ENSG00000140199	SLC12A6	solute carrier family 12 member 6
1208	ENSG00000231784	DBIL5P	diazepam binding inhibitor-like 5, pseudogene
1209	ENSG00000084090	STARD7	StAR related lipid transfer domain containing 7
1210	ENSG00000199121	MIR26B	microRNA 26b
1211	ENSG00000187607	ZNF286A	zinc finger protein 286A
1212	NA	LOC100288069	uncharacterized LOC100288069
1213	ENSG00000189283	FHIT	fragile histidine triad diadenosine triphosphatase
1214	ENSG00000196460	RFX8	regulatory factor X8
1215	ENSG00000284147	MIR3150B	microRNA 3150b
1216	ENSG00000158636	EMSY	EMSY transcriptional repressor, BRCA2 interacting
1217	ENSG00000170634	ACYP2	acylphosphatase 2
1218	ENSG00000113387	SUB1	SUB1 regulator of transcription
1219	ENSG00000169682	SPNS1	sphingolipid transporter 1 (putative)
1220	ENSG00000154727	GABPA	GA binding protein transcription factor subunit alpha
1221	ENSG00000080298	RFX3	regulatory factor X3
1222	ENSG00000165487	MICU2	mitochondrial calcium uptake 2
1223	ENSG00000229980	TOB1-AS1	TOB1 antisense RNA 1
1224	ENSG00000139734	DIAPH3	diaphanous related formin 3
1225	ENSG00000181894	ZNF329	zinc finger protein 329
1226	ENSG00000204427	ABHD16A	abhydrolase domain containing 16A, phospholipase
1227	ENSG00000224531	SMIM13	small integral membrane protein 13
1228	ENSG00000049759	NEDD4L	NEDD4 like E3 ubiquitin protein ligase
1229	ENSG00000198056	PRIM1	DNA primase subunit 1
1230	ENSG00000169242	EFNA1	ephrin A1
1231	ENSG00000138668	HNRNPD	heterogeneous nuclear ribonucleoprotein D
1232	ENSG00000078747	ITCH	itchy E3 ubiquitin protein ligase
1233	ENSG00000009335	UBE3C	ubiquitin protein ligase E3C
1234	ENSG00000165417	GTF2A1	general transcription factor IIA subunit 1
1235	ENSG00000072310	SREBF1	sterol regulatory element binding transcription factor 1
1236	ENSG00000009780	FAM76A	family with sequence similarity 76 member A
1237	ENSG00000161904	LEMD2	LEM domain nuclear envelope protein 2
1238	ENSG00000182087	TMEM259	transmembrane protein 259
1239	ENSG00000117481	NSUN4	NOP2/Sun RNA methyltransferase 4
1240	ENSG00000086102	NFX1	nuclear transcription factor, X-box binding 1
1241	ENSG00000172840	PDP2	pyruvate dehyrogenase phosphatase catalytic subunit 2
1242	ENSG00000134597	RBMX2	RNA binding motif protein X-linked 2
1243	ENSG00000132330	SCLY	selenocysteine lyase
1244	ENSG00000049618	ARID1B	AT-rich interaction domain 1B
1245	ENSG00000174695	TMEM167A	transmembrane protein 167A
1246	ENSG00000131067	GGT7	gamma-glutamyltransferase 7
1247	ENSG00000188760	TMEM198	transmembrane protein 198
1248	ENSG00000080189	SLC35C2	solute carrier family 35 member C2
1249	ENSG00000081026	MAGI3	membrane associated guanylate kinase, WW and PDZ domain containing 3
1250	ENSG00000105656	ELL	elongation factor for RNA polymerase II
1251	ENSG00000163251	FZD5	frizzled class receptor 5
1252	ENSG00000175283	DOLK	dolichol kinase
1253	ENSG00000204278	TMEM235	transmembrane protein 235
1254	ENSG00000224870	MRPL20-AS1	MRPL20 antisense RNA 1
1255	ENSG00000272693	LOC441242	uncharacterized LOC441242
1256	ENSG00000140632	GLYR1	glyoxylate reductase 1 homolog
1257	ENSG00000105552	BCAT2	branched chain amino acid transaminase 2
1258	ENSG00000135900	MRPL44	mitochondrial ribosomal protein L44
1259	ENSG00000263363	MIR5702	microRNA 5702
1260	ENSG00000188095	MESP2	mesoderm posterior bHLH transcription factor 2
1261	ENSG00000096060	FKBP5	FKBP prolyl isomerase 5
1262	ENSG00000105464	GRIN2D	glutamate ionotropic receptor NMDA type subunit 2D
1263	ENSG00000103091	WDR59	WD repeat domain 59
1264	ENSG00000128564	VGF	VGF nerve growth factor inducible
1265	ENSG00000115282	TTC31	tetratricopeptide repeat domain 31
1266	ENSG00000143761	ARF1	ADP ribosylation factor 1
1267	ENSG00000100023	PPIL2	peptidylprolyl isomerase like 2
1268	ENSG00000117054	ACADM	acyl-CoA dehydrogenase medium chain
1269	ENSG00000164253	WDR41	WD repeat domain 41
1270	ENSG00000117533	VAMP4	vesicle associated membrane protein 4
1271	ENSG00000080503	SMARCA2	SWI/SNF related, matrix associated, actin dependent regulator of chromatin, subfamily a, member 2
1272	ENSG00000148396	SEC16A	SEC16 homolog A, endoplasmic reticulum export factor
1273	ENSG00000130511	SSBP4	single stranded DNA binding protein 4
1274	ENSG00000136240	KDELR2	KDEL endoplasmic reticulum protein retention receptor 2
1275	ENSG00000164306	PRIMPOL	primase and DNA directed polymerase
1276	ENSG00000247077	PGAM5	PGAM family member 5, mitochondrial serine/threonine protein phosphatase
1277	ENSG00000101003	GINS1	GINS complex subunit 1
1278	ENSG00000171557	FGG	fibrinogen gamma chain
1279	ENSG00000136197	C7orf25	chromosome 7 open reading frame 25
1280	NA	SPAG16-DT	SPAG16 divergent transcript
1281	ENSG00000260456	C16orf95	chromosome 16 open reading frame 95
1282	ENSG00000047056	WDR37	WD repeat domain 37
1283	ENSG00000154222	CC2D1B	coiled-coil and C2 domain containing 1B
1284	ENSG00000112144	CILK1	ciliogenesis associated kinase 1
1285	ENSG00000156172	C8orf37	chromosome 8 open reading frame 37
1286	ENSG00000115414	FN1	fibronectin 1
1287	ENSG00000144560	VGLL4	vestigial like family member 4
1288	ENSG00000165169	DYNLT3	dynein light chain Tctex-type 3
1289	ENSG00000259673	IQCH-AS1	IQCH antisense RNA 1
1290	ENSG00000153815	CMIP	c-Maf inducing protein
1291	ENSG00000079785	DDX1	DEAD-box helicase 1
1292	ENSG00000251022	THAP9-AS1	THAP9 antisense RNA 1
1293	ENSG00000119684	MLH3	mutL homolog 3
1294	ENSG00000156876	SASS6	SAS-6 centriolar assembly protein
1295	ENSG00000130764	LRRC47	leucine rich repeat containing 47
1296	ENSG00000179950	PUF60	poly(U) binding splicing factor 60
1297	ENSG00000151491	EPS8	epidermal growth factor receptor pathway substrate 8
1298	ENSG00000141568	FOXK2	forkhead box K2
1299	ENSG00000144152	FBLN7	fibulin 7
1300	ENSG00000148225	WDR31	WD repeat domain 31
1301	ENSG00000125691	RPL23	ribosomal protein L23
1302	ENSG00000129003	VPS13C	vacuolar protein sorting 13 homolog C
1303	ENSG00000163754	GYG1	glycogenin 1
1304	ENSG00000151445	VIPAS39	VPS33B interacting protein, apical-basolateral polarity regulator, spe-39 homolog
1305	ENSG00000115718	PROC	protein C, inactivator of coagulation factors Va and VIIIa
1306	ENSG00000117222	RBBP5	RB binding protein 5, histone lysine methyltransferase complex subunit
1307	ENSG00000070404	FSTL3	follistatin like 3
1308	ENSG00000172059	KLF11	Kruppel like factor 11
1309	ENSG00000169174	PCSK9	proprotein convertase subtilisin/kexin type 9
1310	ENSG00000066136	NFYC	nuclear transcription factor Y subunit gamma
1311	ENSG00000123933	MXD4	MAX dimerization protein 4
1312	ENSG00000102753	KPNA3	karyopherin subunit alpha 3
1313	ENSG00000102241	HTATSF1	HIV-1 Tat specific factor 1
1314	ENSG00000121774	KHDRBS1	KH RNA binding domain containing, signal transduction associated 1
1315	ENSG00000121073	SLC35B1	solute carrier family 35 member B1
1316	ENSG00000134987	WDR36	WD repeat domain 36
1317	ENSG00000014824	SLC30A9	solute carrier family 30 member 9
1318	ENSG00000137409	MTCH1	mitochondrial carrier 1
1319	ENSG00000112242	E2F3	E2F transcription factor 3
1320	ENSG00000134265	NAPG	NSF attachment protein gamma
1321	ENSG00000124333	VAMP7	vesicle associated membrane protein 7
1322	ENSG00000177311	ZBTB38	zinc finger and BTB domain containing 38
1323	ENSG00000142082	SIRT3	sirtuin 3
1324	ENSG00000113734	BNIP1	BCL2 interacting protein 1
1325	ENSG00000108848	LUC7L3	LUC7 like 3 pre-mRNA splicing factor
1326	ENSG00000074771	NOX3	NADPH oxidase 3
1327	ENSG00000185475	TMEM179B	transmembrane protein 179B
1328	ENSG00000021776	AQR	aquarius intron-binding spliceosomal factor
1329	ENSG00000162337	LRP5	LDL receptor related protein 5
1330	ENSG00000124181	PLCG1	phospholipase C gamma 1
1331	ENSG00000156802	ATAD2	ATPase family AAA domain containing 2
1332	ENSG00000025293	PHF20	PHD finger protein 20
1333	ENSG00000132906	CASP9	caspase 9
1334	ENSG00000158480	SPATA2	spermatogenesis associated 2
1335	ENSG00000158987	RAPGEF6	Rap guanine nucleotide exchange factor 6
1336	ENSG00000171119	NRTN	neurturin
1337	ENSG00000147601	TERF1	telomeric repeat binding factor 1
1338	ENSG00000140400	MAN2C1	mannosidase alpha class 2C member 1
1339	ENSG00000284419	MIR663A	microRNA 663a
1340	ENSG00000146701	MDH2	malate dehydrogenase 2
1341	ENSG00000187778	MCRS1	microspherule protein 1
1342	ENSG00000198742	SMURF1	SMAD specific E3 ubiquitin protein ligase 1
1343	ENSG00000087470	DNM1L	dynamin 1 like
1344	ENSG00000184708	EIF4ENIF1	eukaryotic translation initiation factor 4E nuclear import factor 1
1345	ENSG00000188493	C19orf54	chromosome 19 open reading frame 54
1346	ENSG00000145979	TBC1D7	TBC1 domain family member 7
1347	ENSG00000048544	MRPS10	mitochondrial ribosomal protein S10
1348	ENSG00000161277	THAP8	THAP domain containing 8
1349	ENSG00000003137	CYP26B1	cytochrome P450 family 26 subfamily B member 1
1350	ENSG00000185238	PRMT3	protein arginine methyltransferase 3
1351	ENSG00000100154	TTC28	tetratricopeptide repeat domain 28
1352	ENSG00000113460	BRIX1	biogenesis of ribosomes BRX1
1353	ENSG00000178338	ZNF354B	zinc finger protein 354B
1354	ENSG00000117308	GALE	UDP-galactose-4-epimerase
1355	ENSG00000115486	GGCX	gamma-glutamyl carboxylase
1356	ENSG00000167280	ENGASE	endo-beta-N-acetylglucosaminidase
1357	ENSG00000120265	PCMT1	protein-L-isoaspartate (D-aspartate) O-methyltransferase
1358	ENSG00000084073	ZMPSTE24	zinc metallopeptidase STE24
1359	ENSG00000077348	EXOSC5	exosome component 5
1360	ENSG00000117758	STX12	syntaxin 12
1361	ENSG00000148200	NR6A1	nuclear receptor subfamily 6 group A member 1
1362	ENSG00000148950	IMMP1L	inner mitochondrial membrane peptidase subunit 1
1363	ENSG00000286237	ARMCX5-GPRASP2	ARMCX5-GPRASP2 readthrough
1364	ENSG00000151304	SRFBP1	serum response factor binding protein 1
1365	ENSG00000165699	TSC1	TSC complex subunit 1
1366	ENSG00000204444	APOM	apolipoprotein M
1367	ENSG00000230366	DSCR9	Down syndrome critical region 9
1368	ENSG00000197780	TAF13	TATA-box binding protein associated factor 13
1369	ENSG00000115507	OTX1	orthodenticle homeobox 1
1370	ENSG00000253352	TUG1	taurine up-regulated 1
1371	ENSG00000080345	RIF1	replication timing regulatory factor 1
1372	ENSG00000132623	ANKEF1	ankyrin repeat and EF-hand domain containing 1
1373	ENSG00000269743	SLC25A53	solute carrier family 25 member 53
1374	ENSG00000151413	NUBPL	nucleotide binding protein like
1375	ENSG00000162783	IER5	immediate early response 5
1376	ENSG00000121417	ZNF211	zinc finger protein 211
1377	ENSG00000086289	EPDR1	ependymin related 1
1378	ENSG00000136891	TEX10	testis expressed 10
1379	ENSG00000178904	DPY19L3	dpy-19 like C-mannosyltransferase 3
1380	NA	CCDC18-AS1	CCDC18 antisense RNA 1
1381	ENSG00000063322	MED29	mediator complex subunit 29
1382	ENSG00000096093	EFHC1	EF-hand domain containing 1
1383	ENSG00000168803	ADAL	adenosine deaminase like
1384	ENSG00000123999	INHA	inhibin subunit alpha
1385	ENSG00000115525	ST3GAL5	ST3 beta-galactoside alpha-2,3-sialyltransferase 5
1386	ENSG00000167182	SP2	Sp2 transcription factor
1387	ENSG00000178997	EXD1	exonuclease 3'-5' domain containing 1
1388	ENSG00000149548	CCDC15	coiled-coil domain containing 15
1389	ENSG00000103121	CMC2	C-X9-C motif containing 2
1390	ENSG00000129521	EGLN3	egl-9 family hypoxia inducible factor 3
1391	ENSG00000103042	SLC38A7	solute carrier family 38 member 7
1392	ENSG00000067369	TP53BP1	tumor protein p53 binding protein 1
1393	ENSG00000162396	PARS2	prolyl-tRNA synthetase 2, mitochondrial
1394	ENSG00000196859	KRT39	keratin 39
1395	ENSG00000132661	NXT1	nuclear transport factor 2 like export factor 1
1396	ENSG00000134318	ROCK2	Rho associated coiled-coil containing protein kinase 2
1397	ENSG00000196843	ARID5A	AT-rich interaction domain 5A
1398	ENSG00000155876	RRAGA	Ras related GTP binding A
1399	ENSG00000226416	MRPL23-AS1	MRPL23 antisense RNA 1
1400	ENSG00000144034	TPRKB	TP53RK binding protein
1401	ENSG00000179476	C14orf28	chromosome 14 open reading frame 28
1402	ENSG00000165233	CARD19	caspase recruitment domain family member 19
1403	ENSG00000063176	SPHK2	sphingosine kinase 2
1404	ENSG00000087206	UIMC1	ubiquitin interaction motif containing 1
1405	ENSG00000171960	PPIH	peptidylprolyl isomerase H
1406	ENSG00000032389	EIPR1	EARP complex and GARP complex interacting protein 1
1407	ENSG00000106263	EIF3B	eukaryotic translation initiation factor 3 subunit B
1408	ENSG00000196465	MYL6B	myosin light chain 6B
1409	ENSG00000168040	FADD	Fas associated via death domain
1410	ENSG00000213983	AP1G2	adaptor related protein complex 1 subunit gamma 2
1411	ENSG00000164967	RPP25L	ribonuclease P/MRP subunit p25 like
1412	ENSG00000140332	TLE3	TLE family member 3, transcriptional corepressor
1413	ENSG00000127125	PPCS	phosphopantothenoylcysteine synthetase
1414	ENSG00000172113	NME6	NME/NM23 nucleoside diphosphate kinase 6
1415	ENSG00000110583	NAA40	N-alpha-acetyltransferase 40, NatD catalytic subunit
1416	ENSG00000112343	TRIM38	tripartite motif containing 38
1417	ENSG00000181544	FANCB	FA complementation group B
1418	ENSG00000149357	LAMTOR1	late endosomal/lysosomal adaptor, MAPK and MTOR activator 1
1419	ENSG00000152455	SUV39H2	suppressor of variegation 3-9 homolog 2
1420	ENSG00000104731	KLHDC4	kelch domain containing 4
1421	ENSG00000197102	DYNC1H1	dynein cytoplasmic 1 heavy chain 1
1422	ENSG00000144535	DIS3L2	DIS3 like 3'-5' exoribonuclease 2
1423	ENSG00000120756	PLS1	plastin 1
1424	ENSG00000199753	SNORD104	small nucleolar RNA, C/D box 104
1425	ENSG00000213347	MXD3	MAX dimerization protein 3
1426	ENSG00000258890	CEP95	centrosomal protein 95
1427	ENSG00000137185	ZSCAN9	zinc finger and SCAN domain containing 9
1428	ENSG00000107874	CUEDC2	CUE domain containing 2
1429	ENSG00000163466	ARPC2	actin related protein 2/3 complex subunit 2
1430	ENSG00000042088	TDP1	tyrosyl-DNA phosphodiesterase 1
1431	ENSG00000183250	LINC01547	long intergenic non-protein coding RNA 1547
1432	ENSG00000085449	WDFY1	WD repeat and FYVE domain containing 1
1433	ENSG00000138614	INTS14	integrator complex subunit 14
1434	ENSG00000149923	PPP4C	protein phosphatase 4 catalytic subunit
1435	ENSG00000132541	RIDA	reactive intermediate imine deaminase A homolog
1436	ENSG00000099250	NRP1	neuropilin 1
1437	ENSG00000150787	PTS	6-pyruvoyltetrahydropterin synthase
1438	ENSG00000004864	SLC25A13	solute carrier family 25 member 13
1439	ENSG00000175643	RMI2	RecQ mediated genome instability 2
1440	ENSG00000141385	AFG3L2	AFG3 like matrix AAA peptidase subunit 2
1441	ENSG00000099800	TIMM13	translocase of inner mitochondrial membrane 13
1442	ENSG00000168116	KIAA1586	KIAA1586
1443	ENSG00000088970	KIZ	kizuna centrosomal protein
1444	ENSG00000135702	CHST5	carbohydrate sulfotransferase 5
1445	ENSG00000114473	IQCG	IQ motif containing G
1446	ENSG00000149743	TRPT1	tRNA phosphotransferase 1
1447	ENSG00000115425	PECR	peroxisomal trans-2-enoyl-CoA reductase
1448	ENSG00000174446	SNAPC5	small nuclear RNA activating complex polypeptide 5
1449	ENSG00000243709	LEFTY1	left-right determination factor 1
1450	ENSG00000155100	OTUD6B	OTU deubiquitinase 6B
1451	ENSG00000123136	DDX39A	DExD-box helicase 39A
1452	ENSG00000177946	CENPBD1	CENPB DNA-binding domain containing 1
1453	ENSG00000142459	EVI5L	ecotropic viral integration site 5 like
1454	ENSG00000119487	MAPKAP1	MAPK associated protein 1
1455	ENSG00000115808	STRN	striatin
1456	ENSG00000198839	ZNF277	zinc finger protein 277
1457	ENSG00000167815	PRDX2	peroxiredoxin 2
1458	ENSG00000123095	BHLHE41	basic helix-loop-helix family member e41
1459	ENSG00000100926	TM9SF1	transmembrane 9 superfamily member 1
1460	ENSG00000140807	NKD1	NKD inhibitor of WNT signaling pathway 1
1461	ENSG00000088179	PTPN4	protein tyrosine phosphatase non-receptor type 4
1462	ENSG00000142945	KIF2C	kinesin family member 2C
1463	ENSG00000166797	CIAO2A	cytosolic iron-sulfur assembly component 2A
1464	ENSG00000182093	GET1	guided entry of tail-anchored proteins factor 1
1465	ENSG00000258984	UBE2F-SCLY	UBE2F-SCLY readthrough (NMD candidate)
1466	ENSG00000092439	TRPM7	transient receptor potential cation channel subfamily M member 7
1467	ENSG00000108424	KPNB1	karyopherin subunit beta 1
1468	ENSG00000205981	DNAJC19	DnaJ heat shock protein family (Hsp40) member C19
1469	ENSG00000089220	PEBP1	phosphatidylethanolamine binding protein 1
1470	ENSG00000173209	AHSA2P	activator of HSP90 ATPase homolog 2, pseudogene
1471	ENSG00000125835	SNRPB	small nuclear ribonucleoprotein polypeptides B and B1
1472	ENSG00000167840	ZNF232	zinc finger protein 232
1473	ENSG00000033050	ABCF2	ATP binding cassette subfamily F member 2
1474	ENSG00000231028	LINC00271	long intergenic non-protein coding RNA 271
1475	ENSG00000165355	FBXO33	F-box protein 33
1476	ENSG00000262664	OVCA2	OVCA2 serine hydrolase domain containing
1477	ENSG00000225470	JPX	JPX transcript, XIST activator
1478	ENSG00000163541	SUCLG1	succinate-CoA ligase GDP/ADP-forming subunit alpha
1479	ENSG00000119471	HSDL2	hydroxysteroid dehydrogenase like 2
1480	ENSG00000092020	PPP2R3C	protein phosphatase 2 regulatory subunit B''gamma
1481	ENSG00000105808	RASA4	RAS p21 protein activator 4
1482	ENSG00000180423	HARBI1	harbinger transposase derived 1
1483	NA	LOC646626	uncharacterized LOC646626
1484	ENSG00000101199	ARFGAP1	ADP ribosylation factor GTPase activating protein 1
1485	ENSG00000102996	MMP15	matrix metallopeptidase 15
1486	ENSG00000124222	STX16	syntaxin 16
1487	ENSG00000007341	ST7L	suppression of tumorigenicity 7 like
1488	ENSG00000198723	TEX45	testis expressed 45
1489	ENSG00000131871	SELENOS	selenoprotein S
1490	ENSG00000162384	CZIB	CXXC motif containing zinc binding protein
1491	ENSG00000101624	CEP76	centrosomal protein 76
1492	ENSG00000163166	IWS1	interacts with SUPT6H, CTD assembly factor 1
1493	ENSG00000197965	MPZL1	myelin protein zero like 1
1494	ENSG00000117000	RLF	RLF zinc finger
1495	ENSG00000090889	KIF4A	kinesin family member 4A
1496	ENSG00000173692	PSMD1	proteasome 26S subunit, non-ATPase 1
1497	ENSG00000140009	ESR2	estrogen receptor 2
1498	ENSG00000175166	PSMD2	proteasome 26S subunit ubiquitin receptor, non-ATPase 2
1499	ENSG00000151320	AKAP6	A-kinase anchoring protein 6
1500	ENSG00000124588	NQO2	N-ribosyldihydronicotinamide:quinone reductase 2
1501	ENSG00000183137	CEP57L1	centrosomal protein 57 like 1
1502	ENSG00000111785	RIC8B	RIC8 guanine nucleotide exchange factor B
1503	ENSG00000111412	SPRING1	SREBF pathway regulator in golgi 1
1504	ENSG00000007520	TSR3	TSR3 ribosome maturation factor
1505	ENSG00000131759	RARA	retinoic acid receptor alpha
1506	ENSG00000277157	H4C4	H4 clustered histone 4
1507	ENSG00000175376	EIF1AD	eukaryotic translation initiation factor 1A domain containing
1508	ENSG00000130522	JUND	JunD proto-oncogene, AP-1 transcription factor subunit
1509	ENSG00000248275	TRIM52-AS1	TRIM52 antisense RNA 1 (head to head)
1510	ENSG00000196511	TPK1	thiamin pyrophosphokinase 1
1511	ENSG00000139350	NEDD1	NEDD1 gamma-tubulin ring complex targeting factor
1512	ENSG00000104368	PLAT	plasminogen activator, tissue type
1513	ENSG00000112365	ZBTB24	zinc finger and BTB domain containing 24
1514	ENSG00000197713	RPE	ribulose-5-phosphate-3-epimerase
1515	ENSG00000135547	HEY2	hes related family bHLH transcription factor with YRPW motif 2
1516	ENSG00000116521	SCAMP3	secretory carrier membrane protein 3
1517	ENSG00000076554	TPD52	tumor protein D52
1518	NA	RNF138P1	ring finger protein 138 pseudogene 1
1519	ENSG00000180035	ZNF48	zinc finger protein 48
1520	ENSG00000148824	MTG1	mitochondrial ribosome associated GTPase 1
1521	ENSG00000135540	NHSL1	NHS like 1
1522	ENSG00000115548	KDM3A	lysine demethylase 3A
1523	ENSG00000156162	DPY19L4	dpy-19 like 4
1524	ENSG00000204138	PHACTR4	phosphatase and actin regulator 4
1525	ENSG00000170779	CDCA4	cell division cycle associated 4
1526	ENSG00000153094	BCL2L11	BCL2 like 11
1527	ENSG00000126254	RBM42	RNA binding motif protein 42
1528	ENSG00000111885	MAN1A1	mannosidase alpha class 1A member 1
1529	ENSG00000196458	ZNF605	zinc finger protein 605
1530	ENSG00000115841	RMDN2	regulator of microtubule dynamics 2
1531	ENSG00000266649	MIR3126	microRNA 3126
1532	ENSG00000101076	HNF4A	hepatocyte nuclear factor 4 alpha
1533	ENSG00000274978	RNU11	RNA, U11 small nuclear
1534	ENSG00000266320	MIR3909	microRNA 3909
1535	ENSG00000162244	RPL29	ribosomal protein L29
1536	ENSG00000096401	CDC5L	cell division cycle 5 like
1537	ENSG00000176953	NFATC2IP	nuclear factor of activated T cells 2 interacting protein
1538	ENSG00000211455	STK38L	serine/threonine kinase 38 like
1539	ENSG00000111832	RWDD1	RWD domain containing 1
1540	ENSG00000157823	AP3S2	adaptor related protein complex 3 subunit sigma 2
1541	ENSG00000160888	IER2	immediate early response 2
1542	ENSG00000067221	STOML1	stomatin like 1
1543	ENSG00000175104	TRAF6	TNF receptor associated factor 6
1544	ENSG00000008277	ADAM22	ADAM metallopeptidase domain 22
1545	ENSG00000126583	PRKCG	protein kinase C gamma
1546	ENSG00000103657	HERC1	HECT and RLD domain containing E3 ubiquitin protein ligase family member 1
1547	ENSG00000183323	CCDC125	coiled-coil domain containing 125
1548	ENSG00000280409	LINC01101	long intergenic non-protein coding RNA 1101
1549	ENSG00000107929	LARP4B	La ribonucleoprotein 4B
1550	ENSG00000177410	ZFAS1	ZNFX1 antisense RNA 1
1551	ENSG00000105793	GTPBP10	GTP binding protein 10
1552	ENSG00000231312	MAP4K3-DT	MAP4K3 divergent transcript
1553	ENSG00000146909	NOM1	nucleolar protein with MIF4G domain 1
1554	ENSG00000112576	CCND3	cyclin D3
1555	ENSG00000110274	CEP164	centrosomal protein 164
1556	NA	C21orf62-AS1	C21orf62 antisense RNA 1
1557	ENSG00000089597	GANAB	glucosidase II alpha subunit
1558	ENSG00000165650	PDZD8	PDZ domain containing 8
1559	ENSG00000137267	TUBB2A	tubulin beta 2A class IIa
1560	ENSG00000104738	MCM4	minichromosome maintenance complex component 4
1561	ENSG00000102858	MGRN1	mahogunin ring finger 1
1562	ENSG00000133997	MED6	mediator complex subunit 6
1563	ENSG00000111196	MAGOHB	mago homolog B, exon junction complex subunit
1564	ENSG00000173567	ADGRF3	adhesion G protein-coupled receptor F3
1565	ENSG00000125520	SLC2A4RG	SLC2A4 regulator
1566	ENSG00000213523	SRA1	steroid receptor RNA activator 1
1567	ENSG00000106153	CHCHD2	coiled-coil-helix-coiled-coil-helix domain containing 2
1568	ENSG00000139160	ETFBKMT	electron transfer flavoprotein subunit beta lysine methyltransferase
1569	ENSG00000132388	UBE2G1	ubiquitin conjugating enzyme E2 G1
1570	ENSG00000070476	ZXDC	ZXD family zinc finger C
1571	NA	TPTE2P5	transmembrane phosphoinositide 3-phosphatase and tensin homolog 2 pseudogene 5
1572	ENSG00000084774	CAD	carbamoyl-phosphate synthetase 2, aspartate transcarbamylase, and dihydroorotase
1573	ENSG00000172869	DMXL1	Dmx like 1
1574	ENSG00000130244	FAM98C	family with sequence similarity 98 member C
1575	ENSG00000234127	TRIM26	tripartite motif containing 26
1576	ENSG00000205864	KRTAP5-6	keratin associated protein 5-6
1577	ENSG00000136574	GATA4	GATA binding protein 4
1578	ENSG00000119041	GTF3C3	general transcription factor IIIC subunit 3
1579	ENSG00000197818	SLC9A8	solute carrier family 9 member A8
1580	ENSG00000103429	BFAR	bifunctional apoptosis regulator
1581	ENSG00000128656	CHN1	chimerin 1
1582	ENSG00000124688	MAD2L1BP	MAD2L1 binding protein
1583	ENSG00000203760	CENPW	centromere protein W
1584	ENSG00000230613	HM13-AS1	HM13 antisense RNA 1
1585	ENSG00000154473	BUB3	BUB3 mitotic checkpoint protein
1586	ENSG00000168256	NKIRAS2	NFKB inhibitor interacting Ras like 2
1587	ENSG00000135912	TTLL4	tubulin tyrosine ligase like 4
1588	ENSG00000122042	UBL3	ubiquitin like 3
1589	ENSG00000163535	SGO2	shugoshin 2
1590	ENSG00000175634	RPS6KB2	ribosomal protein S6 kinase B2
1591	ENSG00000089101	CFAP61	cilia and flagella associated protein 61
1592	ENSG00000198380	GFPT1	glutamine--fructose-6-phosphate transaminase 1
1593	ENSG00000177683	THAP5	THAP domain containing 5
1594	ENSG00000152348	ATG10	autophagy related 10
1595	ENSG00000178177	LCORL	ligand dependent nuclear receptor corepressor like
1596	ENSG00000265991	MIR4519	microRNA 4519
1597	ENSG00000128185	DGCR6L	DiGeorge syndrome critical region gene 6 like
1598	ENSG00000136448	NMT1	N-myristoyltransferase 1
1599	ENSG00000140961	OSGIN1	oxidative stress induced growth inhibitor 1
1600	ENSG00000084731	KIF3C	kinesin family member 3C
1601	ENSG00000198746	GPATCH3	G-patch domain containing 3
1602	ENSG00000133961	NUMB	NUMB endocytic adaptor protein
1603	ENSG00000259040	BLOC1S5-TXNDC5	BLOC1S5-TXNDC5 readthrough (NMD candidate)
1604	ENSG00000103199	ZNF500	zinc finger protein 500
1605	ENSG00000240849	PEDS1	plasmanylethanolamine desaturase 1
1606	ENSG00000138035	PNPT1	polyribonucleotide nucleotidyltransferase 1
1607	ENSG00000166508	MCM7	minichromosome maintenance complex component 7
1608	ENSG00000118855	MFSD1	major facilitator superfamily domain containing 1
1609	ENSG00000162521	RBBP4	RB binding protein 4, chromatin remodeling factor
1610	ENSG00000164091	WDR82	WD repeat domain 82
1611	ENSG00000214765	SEPTIN7P2	septin 7 pseudogene 2
1612	ENSG00000166579	NDEL1	nudE neurodevelopment protein 1 like 1
1613	ENSG00000243725	TTC4	tetratricopeptide repeat domain 4
1614	ENSG00000100554	ATP6V1D	ATPase H+ transporting V1 subunit D
1615	ENSG00000183856	IQGAP3	IQ motif containing GTPase activating protein 3
1616	ENSG00000111481	COPZ1	COPI coat complex subunit zeta 1
1617	ENSG00000225828	FAM229A	family with sequence similarity 229 member A
1618	ENSG00000090674	MCOLN1	mucolipin TRP cation channel 1
1619	ENSG00000148399	DPH7	diphthamide biosynthesis 7
1620	ENSG00000124596	OARD1	O-acyl-ADP-ribose deacylase 1
1621	ENSG00000180376	CCDC66	coiled-coil domain containing 66
1622	ENSG00000257698	GIHCG	GIHCG inhibitor of miR-200b/200a/429 expression
1623	ENSG00000108406	DHX40	DEAH-box helicase 40
1624	ENSG00000113763	UNC5A	unc-5 netrin receptor A
1625	ENSG00000100201	DDX17	DEAD-box helicase 17
1626	ENSG00000156873	PHKG2	phosphorylase kinase catalytic subunit gamma 2
1627	ENSG00000146067	FAM193B	family with sequence similarity 193 member B
1628	ENSG00000010072	SPRTN	SprT-like N-terminal domain
1629	ENSG00000236423	LINC01134	long intergenic non-protein coding RNA 1134
1630	ENSG00000120647	CCDC77	coiled-coil domain containing 77
1631	ENSG00000124212	PTGIS	prostaglandin I2 synthase
1632	ENSG00000083937	CHMP2B	charged multivesicular body protein 2B
1633	ENSG00000144224	UBXN4	UBX domain protein 4
1634	ENSG00000196437	ZNF569	zinc finger protein 569
1635	ENSG00000135336	ORC3	origin recognition complex subunit 3
1636	ENSG00000145919	BOD1	biorientation of chromosomes in cell division 1
1637	ENSG00000231473	RB1-DT	RB1 divergent transcript
1638	ENSG00000162959	MEMO1	mediator of cell motility 1
1639	ENSG00000169372	CRADD	CASP2 and RIPK1 domain containing adaptor with death domain
1640	ENSG00000175467	SART1	spliceosome associated factor 1, recruiter of U4/U6.U5 tri-snRNP
1641	ENSG00000167186	COQ7	coenzyme Q7, hydroxylase
1642	ENSG00000155256	ZFYVE27	zinc finger FYVE-type containing 27
1643	ENSG00000130939	UBE4B	ubiquitination factor E4B
1644	ENSG00000158092	NCK1	NCK adaptor protein 1
1645	ENSG00000187735	TCEA1	transcription elongation factor A1
1646	ENSG00000141101	NOB1	NIN1 (RPN12) binding protein 1 homolog
1647	ENSG00000112685	EXOC2	exocyst complex component 2
1648	ENSG00000103043	VAC14	VAC14 component of PIKFYVE complex
1649	ENSG00000185697	MYBL1	MYB proto-oncogene like 1
1650	ENSG00000063761	ADCK1	aarF domain containing kinase 1
1651	ENSG00000172006	ZNF554	zinc finger protein 554
1652	ENSG00000134049	IER3IP1	immediate early response 3 interacting protein 1
1653	ENSG00000176225	RTTN	rotatin
1654	ENSG00000171045	TSNARE1	t-SNARE domain containing 1
1655	ENSG00000101346	POFUT1	protein O-fucosyltransferase 1
1656	ENSG00000173545	ZNF622	zinc finger protein 622
1657	ENSG00000265452	MIR3682	microRNA 3682
1658	ENSG00000173812	EIF1	eukaryotic translation initiation factor 1
1659	ENSG00000122299	ZC3H7A	zinc finger CCCH-type containing 7A
1660	ENSG00000167085	PHB	prohibitin
1661	ENSG00000198369	SPRED2	sprouty related EVH1 domain containing 2
1662	ENSG00000169131	ZNF354A	zinc finger protein 354A
1663	ENSG00000134086	VHL	von Hippel-Lindau tumor suppressor
1664	ENSG00000092108	SCFD1	sec1 family domain containing 1
1665	ENSG00000160949	TONSL	tonsoku like, DNA repair protein
1666	ENSG00000121101	TEX14	testis expressed 14, intercellular bridge forming factor
1667	ENSG00000163755	HPS3	HPS3 biogenesis of lysosomal organelles complex 2 subunit 1
1668	ENSG00000115738	ID2	inhibitor of DNA binding 2
1669	ENSG00000137411	VARS2	valyl-tRNA synthetase 2, mitochondrial
1670	ENSG00000082146	STRADB	STE20 related adaptor beta
1671	ENSG00000165244	ZNF367	zinc finger protein 367
1672	ENSG00000125818	PSMF1	proteasome inhibitor subunit 1
1673	ENSG00000118007	STAG1	stromal antigen 1
1674	ENSG00000284092	MIR5703	microRNA 5703
1675	ENSG00000272047	GTF2H5	general transcription factor IIH subunit 5
1676	ENSG00000197976	AKAP17A	A-kinase anchoring protein 17A
1677	ENSG00000153107	ANAPC1	anaphase promoting complex subunit 1
1678	ENSG00000258940	MIA2-AS1	MIA2 antisense RNA 1
1679	ENSG00000170881	RNF139	ring finger protein 139
1680	ENSG00000071564	TCF3	transcription factor 3
1681	NA	TPT1-AS1	TPT1 antisense RNA 1
1682	ENSG00000068697	LAPTM4A	lysosomal protein transmembrane 4 alpha
1683	ENSG00000115762	PLEKHB2	pleckstrin homology domain containing B2
1684	ENSG00000182405	PGBD4	piggyBac transposable element derived 4
1685	ENSG00000114904	NEK4	NIMA related kinase 4
1686	ENSG00000083817	ZNF416	zinc finger protein 416
1687	ENSG00000141526	SLC16A3	solute carrier family 16 member 3
1688	ENSG00000133872	SARAF	store-operated calcium entry associated regulatory factor
1689	ENSG00000153443	UBALD1	UBA like domain containing 1
1690	ENSG00000139438	FAM222A	family with sequence similarity 222 member A
1691	ENSG00000111271	ACAD10	acyl-CoA dehydrogenase family member 10
1692	ENSG00000161204	ABCF3	ATP binding cassette subfamily F member 3
1693	ENSG00000166226	CCT2	chaperonin containing TCP1 subunit 2
1694	ENSG00000070367	EXOC5	exocyst complex component 5
1695	ENSG00000171723	GPHN	gephyrin
1696	ENSG00000261796	ISY1-RAB43	ISY1-RAB43 readthrough
1697	ENSG00000151876	FBXO4	F-box protein 4
1698	ENSG00000196118	CCDC189	coiled-coil domain containing 189
1699	NA	LOC100129316	uncharacterized LOC100129316
1700	ENSG00000143891	GALM	galactose mutarotase
1701	ENSG00000148840	PPRC1	PPARG related coactivator 1
1702	ENSG00000118965	WDR35	WD repeat domain 35
1703	ENSG00000141570	CBX8	chromobox 8
1704	ENSG00000283871	MIR130B	microRNA 130b
1705	ENSG00000132153	DHX30	DExH-box helicase 30
1706	ENSG00000118689	FOXO3	forkhead box O3
1707	ENSG00000087152	ATXN7L3	ataxin 7 like 3
1708	ENSG00000105829	BET1	Bet1 golgi vesicular membrane trafficking protein
1709	ENSG00000136485	DCAF7	DDB1 and CUL4 associated factor 7
1710	ENSG00000170854	RIOX2	ribosomal oxygenase 2
1711	ENSG00000133895	MEN1	menin 1
1712	ENSG00000124257	NEURL2	neuralized E3 ubiquitin protein ligase 2
1713	ENSG00000251369	ZNF550	zinc finger protein 550
1714	ENSG00000066044	ELAVL1	ELAV like RNA binding protein 1
1715	ENSG00000125149	PHAF1	phagosome assembly factor 1
1716	ENSG00000197885	NKIRAS1	NFKB inhibitor interacting Ras like 1
1717	ENSG00000100412	ACO2	aconitase 2
1718	ENSG00000095906	NUBP2	nucleotide binding protein 2
1719	ENSG00000114735	HEMK1	HemK methyltransferase family member 1
1720	ENSG00000114268	PFKFB4	6-phosphofructo-2-kinase/fructose-2,6-biphosphatase 4
1721	ENSG00000182481	KPNA2	karyopherin subunit alpha 2
1722	ENSG00000108666	C17orf75	chromosome 17 open reading frame 75
1723	ENSG00000165264	NDUFB6	NADH:ubiquinone oxidoreductase subunit B6
1724	ENSG00000087460	GNAS	GNAS complex locus
1725	ENSG00000267855	NDUFA7	NADH:ubiquinone oxidoreductase subunit A7
1726	ENSG00000167523	SPATA33	spermatogenesis associated 33
1727	ENSG00000151611	MMAA	metabolism of cobalamin associated A
1728	ENSG00000162408	NOL9	nucleolar protein 9
1729	ENSG00000189046	ALKBH2	alkB homolog 2, alpha-ketoglutarate dependent dioxygenase
1730	ENSG00000162650	ATXN7L2	ataxin 7 like 2
1731	ENSG00000136371	MTHFS	methenyltetrahydrofolate synthetase
1732	ENSG00000131899	LLGL1	LLGL scribble cell polarity complex component 1
1733	ENSG00000234492	RPL34-DT	RPL34 divergent transcript
1734	ENSG00000144136	SLC20A1	solute carrier family 20 member 1
1735	ENSG00000054965	FAM168A	family with sequence similarity 168 member A
1736	ENSG00000114354	TFG	trafficking from ER to golgi regulator
1737	ENSG00000170802	FOXN2	forkhead box N2
1738	ENSG00000218739	CEBPZOS	CEBPZ opposite strand
1739	ENSG00000136802	LRRC8A	leucine rich repeat containing 8 VRAC subunit A
1740	ENSG00000113739	STC2	stanniocalcin 2
1741	ENSG00000159873	CCDC117	coiled-coil domain containing 117
1742	ENSG00000167977	KCTD5	potassium channel tetramerization domain containing 5
1743	ENSG00000126870	DYNC2I1	dynein 2 intermediate chain 1
1744	ENSG00000185753	CXorf38	chromosome X open reading frame 38
1745	ENSG00000073536	NLE1	notchless homolog 1
1746	ENSG00000069248	NUP133	nucleoporin 133
1747	ENSG00000164976	MYORG	myogenesis regulating glycosidase (putative)
1748	ENSG00000157741	UBN2	ubinuclein 2
1749	ENSG00000167112	TRUB2	TruB pseudouridine synthase family member 2
1750	ENSG00000140443	IGF1R	insulin like growth factor 1 receptor
1751	ENSG00000082641	NFE2L1	nuclear factor, erythroid 2 like 1
1752	ENSG00000104866	PPP1R37	protein phosphatase 1 regulatory subunit 37
1753	ENSG00000107140	TESK1	testis associated actin remodelling kinase 1
1754	ENSG00000145740	SLC30A5	solute carrier family 30 member 5
1755	ENSG00000114125	RNF7	ring finger protein 7
1756	ENSG00000132646	PCNA	proliferating cell nuclear antigen
1757	ENSG00000137504	CREBZF	CREB/ATF bZIP transcription factor
1758	ENSG00000120533	ENY2	ENY2 transcription and export complex 2 subunit
1759	ENSG00000141627	DYM	dymeclin
1760	ENSG00000110104	CCDC86	coiled-coil domain containing 86
1761	ENSG00000067596	DHX8	DEAH-box helicase 8
1762	ENSG00000235194	PPP1R3E	protein phosphatase 1 regulatory subunit 3E
1763	ENSG00000172992	DCAKD	dephospho-CoA kinase domain containing
1764	ENSG00000117906	RCN2	reticulocalbin 2
1765	ENSG00000188559	RALGAPA2	Ral GTPase activating protein catalytic subunit alpha 2
1766	ENSG00000169813	HNRNPF	heterogeneous nuclear ribonucleoprotein F
1767	ENSG00000197863	ZNF790	zinc finger protein 790
1768	ENSG00000147548	NSD3	nuclear receptor binding SET domain protein 3
1769	ENSG00000157429	ZNF19	zinc finger protein 19
1770	ENSG00000168827	GFM1	G elongation factor mitochondrial 1
1771	ENSG00000108021	TASOR2	transcription activation suppressor family member 2
1772	ENSG00000066654	THUMPD1	THUMP domain containing 1
1773	ENSG00000204237	OXLD1	oxidoreductase like domain containing 1
1774	ENSG00000196591	HDAC2	histone deacetylase 2
1775	ENSG00000171161	ZNF672	zinc finger protein 672
1776	ENSG00000135521	LTV1	LTV1 ribosome biogenesis factor
1777	ENSG00000163961	RNF168	ring finger protein 168
1778	ENSG00000234684	SDCBP2-AS1	SDCBP2 antisense RNA 1
1779	ENSG00000168288	MMADHC	metabolism of cobalamin associated D
1780	ENSG00000154099	DNAAF1	dynein axonemal assembly factor 1
1781	ENSG00000112941	TENT4A	terminal nucleotidyltransferase 4A
1782	ENSG00000168291	PDHB	pyruvate dehydrogenase E1 subunit beta
1783	ENSG00000120705	ETF1	eukaryotic translation termination factor 1
1784	ENSG00000121274	TENT4B	terminal nucleotidyltransferase 4B
1785	ENSG00000135535	CD164	CD164 molecule
1786	ENSG00000137274	BPHL	biphenyl hydrolase like
1787	ENSG00000111802	TDP2	tyrosyl-DNA phosphodiesterase 2
1788	ENSG00000100994	PYGB	glycogen phosphorylase B
1789	ENSG00000131504	DIAPH1	diaphanous related formin 1
1790	ENSG00000001084	GCLC	glutamate-cysteine ligase catalytic subunit
1791	ENSG00000138617	PARP16	poly(ADP-ribose) polymerase family member 16
1792	ENSG00000095380	NANS	N-acetylneuraminate synthase
1793	ENSG00000124207	CSE1L	chromosome segregation 1 like
1794	ENSG00000157954	WIPI2	WD repeat domain, phosphoinositide interacting 2
1795	ENSG00000172663	TMEM134	transmembrane protein 134
1796	ENSG00000128989	ARPP19	cAMP regulated phosphoprotein 19
1797	ENSG00000145780	FEM1C	fem-1 homolog C
1798	ENSG00000161016	RPL8	ribosomal protein L8
1799	ENSG00000106344	RBM28	RNA binding motif protein 28
1800	ENSG00000118482	PHF3	PHD finger protein 3
1801	ENSG00000111678	C12orf57	chromosome 12 open reading frame 57
1802	ENSG00000137478	FCHSD2	FCH and double SH3 domains 2
1803	ENSG00000186153	WWOX	WW domain containing oxidoreductase
1804	ENSG00000131446	MGAT1	alpha-1,3-mannosyl-glycoprotein 2-beta-N-acetylglucosaminyltransferase
1805	ENSG00000172613	RAD9A	RAD9 checkpoint clamp component A
1806	NA	LINC01881	long intergenic non-protein coding RNA 1881
1807	ENSG00000156697	UTP14A	UTP14A small subunit processome component
1808	ENSG00000014138	POLA2	DNA polymerase alpha 2, accessory subunit
1809	ENSG00000188425	NANOS2	nanos C2HC-type zinc finger 2
1810	ENSG00000155085	AK9	adenylate kinase 9
1811	ENSG00000172183	ISG20	interferon stimulated exonuclease gene 20
1812	ENSG00000105821	DNAJC2	DnaJ heat shock protein family (Hsp40) member C2
1813	ENSG00000134077	THUMPD3	THUMP domain containing 3
1814	ENSG00000152292	SH2D6	SH2 domain containing 6
1815	ENSG00000112308	C6orf62	chromosome 6 open reading frame 62
1816	ENSG00000100347	SAMM50	SAMM50 sorting and assembly machinery component
1817	ENSG00000196693	ZNF33B	zinc finger protein 33B
1818	ENSG00000132467	UTP3	UTP3 small subunit processome component
1819	ENSG00000141198	TOM1L1	target of myb1 like 1 membrane trafficking protein
1820	ENSG00000101365	IDH3B	isocitrate dehydrogenase (NAD(+)) 3 non-catalytic subunit beta
1821	ENSG00000064961	HMG20B	high mobility group 20B
1822	ENSG00000198498	TMA16	translation machinery associated 16 homolog
1823	ENSG00000184402	SS18L1	SS18L1 subunit of BAF chromatin remodeling complex
1824	ENSG00000138160	KIF11	kinesin family member 11
1825	ENSG00000170540	ARL6IP1	ADP ribosylation factor like GTPase 6 interacting protein 1
1826	ENSG00000188032	C19orf67	chromosome 19 open reading frame 67
1827	ENSG00000205531	NAP1L4	nucleosome assembly protein 1 like 4
1828	ENSG00000138107	ACTR1A	actin related protein 1A
1829	ENSG00000133059	DSTYK	dual serine/threonine and tyrosine protein kinase
1830	ENSG00000076928	ARHGEF1	Rho guanine nucleotide exchange factor 1
1831	ENSG00000092140	G2E3	G2/M-phase specific E3 ubiquitin protein ligase
1832	ENSG00000165195	PIGA	phosphatidylinositol glycan anchor biosynthesis class A
1833	ENSG00000172878	METAP1D	methionyl aminopeptidase type 1D, mitochondrial
1834	ENSG00000077463	SIRT6	sirtuin 6
1835	ENSG00000101040	ZMYND8	zinc finger MYND-type containing 8
1836	ENSG00000165782	PIP4P1	phosphatidylinositol-4,5-bisphosphate 4-phosphatase 1
1837	ENSG00000134899	ERCC5	ERCC excision repair 5, endonuclease
1838	ENSG00000197980	LEKR1	leucine, glutamate and lysine rich 1
1839	ENSG00000108671	PSMD11	proteasome 26S subunit, non-ATPase 11
1840	ENSG00000111640	GAPDH	glyceraldehyde-3-phosphate dehydrogenase
1841	ENSG00000103035	PSMD7	proteasome 26S subunit, non-ATPase 7
1842	ENSG00000072506	HSD17B10	hydroxysteroid 17-beta dehydrogenase 10
1843	ENSG00000156384	SFR1	SWI5 dependent homologous recombination repair protein 1
1844	ENSG00000285447	ZNF883	zinc finger protein 883
1845	ENSG00000167862	MRPL58	mitochondrial ribosomal protein L58
1846	ENSG00000086598	TMED2	transmembrane p24 trafficking protein 2
1847	ENSG00000102897	LYRM1	LYR motif containing 1
1848	ENSG00000132313	MRPL35	mitochondrial ribosomal protein L35
1849	ENSG00000143321	HDGF	heparin binding growth factor
1850	ENSG00000166562	SEC11C	SEC11 homolog C, signal peptidase complex subunit
1851	ENSG00000169764	UGP2	UDP-glucose pyrophosphorylase 2
1852	ENSG00000170145	SIK2	salt inducible kinase 2
1853	ENSG00000197451	HNRNPAB	heterogeneous nuclear ribonucleoprotein A/B
1854	ENSG00000198690	FAN1	FANCD2 and FANCI associated nuclease 1
1855	ENSG00000100722	ZC3H14	zinc finger CCCH-type containing 14
1856	ENSG00000223797	ENTPD3-AS1	ENTPD3 antisense RNA 1
1857	ENSG00000187522	HSPA14	heat shock protein family A (Hsp70) member 14
1858	ENSG00000142864	SERBP1	SERPINE1 mRNA binding protein 1
1859	ENSG00000165948	IFI27L1	interferon alpha inducible protein 27 like 1
1860	ENSG00000127914	AKAP9	A-kinase anchoring protein 9
1861	ENSG00000148331	ASB6	ankyrin repeat and SOCS box containing 6
1862	ENSG00000143374	TARS2	threonyl-tRNA synthetase 2, mitochondrial
1863	ENSG00000161996	WDR90	WD repeat domain 90
1864	ENSG00000101152	DNAJC5	DnaJ heat shock protein family (Hsp40) member C5
1865	ENSG00000168090	COPS6	COP9 signalosome subunit 6
1866	ENSG00000171311	EXOSC1	exosome component 1
1867	ENSG00000207639	MIR193B	microRNA 193b
1868	ENSG00000116874	WARS2	tryptophanyl tRNA synthetase 2, mitochondrial
1869	ENSG00000104679	R3HCC1	R3H domain and coiled-coil containing 1
1870	ENSG00000156136	DCK	deoxycytidine kinase
1871	ENSG00000104915	STX10	syntaxin 10
1872	ENSG00000117713	ARID1A	AT-rich interaction domain 1A
1873	ENSG00000258735	PPP1R13B-DT	PPP1R13B divergent transcript
1874	ENSG00000149577	SIDT2	SID1 transmembrane family member 2
1875	ENSG00000159131	GART	phosphoribosylglycinamide formyltransferase, phosphoribosylglycinamide synthetase, phosphoribosylaminoimidazole synthetase
1876	ENSG00000113615	SEC24A	SEC24 homolog A, COPII coat complex component
1877	ENSG00000185721	DRG1	developmentally regulated GTP binding protein 1
1878	ENSG00000108786	HSD17B1	hydroxysteroid 17-beta dehydrogenase 1
1879	ENSG00000104973	MED25	mediator complex subunit 25
1880	ENSG00000131467	PSME3	proteasome activator subunit 3
1881	ENSG00000155636	RBM45	RNA binding motif protein 45
1882	ENSG00000146085	MMUT	methylmalonyl-CoA mutase
1883	ENSG00000176809	LRRC37A3	leucine rich repeat containing 37 member A3
1884	ENSG00000101391	CDK5RAP1	CDK5 regulatory subunit associated protein 1
1885	ENSG00000266173	STRADA	STE20 related adaptor alpha
1886	ENSG00000196275	GTF2IRD2	GTF2I repeat domain containing 2
1887	ENSG00000146457	WTAP	WT1 associated protein
1888	ENSG00000115970	THADA	THADA armadillo repeat containing
1889	ENSG00000042753	AP2S1	adaptor related protein complex 2 subunit sigma 1
1890	ENSG00000037637	FBXO42	F-box protein 42
1891	ENSG00000114867	EIF4G1	eukaryotic translation initiation factor 4 gamma 1
1892	ENSG00000171223	JUNB	JunB proto-oncogene, AP-1 transcription factor subunit
1893	ENSG00000131043	AAR2	AAR2 splicing factor
1894	ENSG00000124226	RNF114	ring finger protein 114
1895	ENSG00000131368	MRPS25	mitochondrial ribosomal protein S25
1896	ENSG00000141219	C17orf80	chromosome 17 open reading frame 80
1897	ENSG00000140854	KATNB1	katanin regulatory subunit B1
1898	ENSG00000105373	NOP53	NOP53 ribosome biogenesis factor
1899	ENSG00000117650	NEK2	NIMA related kinase 2
1900	ENSG00000103037	SETD6	SET domain containing 6, protein lysine methyltransferase
1901	ENSG00000095066	HOOK2	hook microtubule tethering protein 2
1902	ENSG00000115561	CHMP3	charged multivesicular body protein 3
1903	ENSG00000235831	BHLHE40-AS1	BHLHE40 antisense RNA 1
1904	ENSG00000165219	GAPVD1	GTPase activating protein and VPS9 domains 1
1905	ENSG00000141873	SLC39A3	solute carrier family 39 member 3
1906	ENSG00000258643	BCL2L2-PABPN1	BCL2L2-PABPN1 readthrough
1907	ENSG00000163002	NUP35	nucleoporin 35
1908	ENSG00000101150	TPD52L2	TPD52 like 2
1909	ENSG00000164715	LMTK2	lemur tyrosine kinase 2
1910	ENSG00000107959	PITRM1	pitrilysin metallopeptidase 1
1911	ENSG00000115484	CCT4	chaperonin containing TCP1 subunit 4
1912	ENSG00000112039	FANCE	FA complementation group E
1913	ENSG00000080839	RBL1	RB transcriptional corepressor like 1
1914	ENSG00000100335	MIEF1	mitochondrial elongation factor 1
1915	ENSG00000246089	LOC100287015	uncharacterized LOC100287015
1916	ENSG00000198015	MRPL42	mitochondrial ribosomal protein L42
1917	ENSG00000111653	ING4	inhibitor of growth family member 4
1918	ENSG00000165282	PIGO	phosphatidylinositol glycan anchor biosynthesis class O
1919	ENSG00000115350	POLE4	DNA polymerase epsilon 4, accessory subunit
1920	ENSG00000086189	DIMT1	DIMT1 rRNA methyltransferase and ribosome maturation factor
1921	ENSG00000102103	PQBP1	polyglutamine binding protein 1
1922	ENSG00000184281	TSSC4	tumor suppressing subtransferable candidate 4
1923	ENSG00000080802	CNOT4	CCR4-NOT transcription complex subunit 4
1924	ENSG00000263643	MIR4515	microRNA 4515
1925	ENSG00000112033	PPARD	peroxisome proliferator activated receptor delta
1926	ENSG00000177426	TGIF1	TGFB induced factor homeobox 1
1927	ENSG00000198554	WDHD1	WD repeat and HMG-box DNA binding protein 1
1928	ENSG00000183891	TTC32	tetratricopeptide repeat domain 32
1929	ENSG00000141367	CLTC	clathrin heavy chain
1930	ENSG00000171617	ENC1	ectodermal-neural cortex 1
1931	ENSG00000167434	CA4	carbonic anhydrase 4
1932	ENSG00000284252	MIR4444-1	microRNA 4444-1
1933	ENSG00000086827	ZW10	zw10 kinetochore protein
1934	ENSG00000169032	MAP2K1	mitogen-activated protein kinase kinase 1
1935	ENSG00000215305	VPS16	VPS16 core subunit of CORVET and HOPS complexes
1936	ENSG00000169718	DUS1L	dihydrouridine synthase 1 like
1937	ENSG00000179029	TMEM107	transmembrane protein 107
1938	ENSG00000171302	CANT1	calcium activated nucleotidase 1
1939	ENSG00000189308	LIN54	lin-54 DREAM MuvB core complex component
1940	ENSG00000185658	BRWD1	bromodomain and WD repeat domain containing 1
1941	ENSG00000139269	INHBE	inhibin subunit beta E
1942	ENSG00000058600	POLR3E	RNA polymerase III subunit E
1943	ENSG00000131398	KCNC3	potassium voltage-gated channel subfamily C member 3
1944	ENSG00000147475	ERLIN2	ER lipid raft associated 2
1945	ENSG00000214046	SMIM7	small integral membrane protein 7
1946	ENSG00000213588	ZBTB9	zinc finger and BTB domain containing 9
1947	ENSG00000130818	ZNF426	zinc finger protein 426
1948	ENSG00000196646	ZNF136	zinc finger protein 136
1949	ENSG00000130935	NOL11	nucleolar protein 11
1950	ENSG00000139631	CSAD	cysteine sulfinic acid decarboxylase
1951	ENSG00000112339	HBS1L	HBS1 like translational GTPase
1952	ENSG00000170100	ZNF778	zinc finger protein 778
1953	ENSG00000242485	MRPL20	mitochondrial ribosomal protein L20
1954	ENSG00000165733	BMS1	BMS1 ribosome biogenesis factor
1955	ENSG00000138430	OLA1	Obg like ATPase 1
1956	ENSG00000122390	NAA60	N-alpha-acetyltransferase 60, NatF catalytic subunit
1957	ENSG00000214725	CDIPTOSP	CDIP transferase opposite strand, pseudogene
1958	ENSG00000147400	CETN2	centrin 2
1959	ENSG00000180979	LRRC57	leucine rich repeat containing 57
1960	ENSG00000136935	GOLGA1	golgin A1
1961	ENSG00000106554	CHCHD3	coiled-coil-helix-coiled-coil-helix domain containing 3
1962	ENSG00000057608	GDI2	GDP dissociation inhibitor 2
1963	ENSG00000182919	C11orf54	chromosome 11 open reading frame 54
1964	ENSG00000155906	RMND1	required for meiotic nuclear division 1 homolog
1965	ENSG00000114744	COMMD2	COMM domain containing 2
1966	ENSG00000071082	RPL31	ribosomal protein L31
1967	ENSG00000125629	INSIG2	insulin induced gene 2
1968	ENSG00000140262	TCF12	transcription factor 12
1969	ENSG00000169714	CNBP	CCHC-type zinc finger nucleic acid binding protein
1970	ENSG00000138777	PPA2	inorganic pyrophosphatase 2
1971	ENSG00000163703	CRELD1	cysteine rich with EGF like domains 1
1972	ENSG00000113522	RAD50	RAD50 double strand break repair protein
1973	ENSG00000134376	CRB1	crumbs cell polarity complex component 1
1974	ENSG00000137563	GGH	gamma-glutamyl hydrolase
1975	ENSG00000154124	OTULIN	OTU deubiquitinase with linear linkage specificity
1976	ENSG00000169016	E2F6	E2F transcription factor 6
1977	ENSG00000266967	AARSD1	alanyl-tRNA synthetase domain containing 1
1978	ENSG00000070950	RAD18	RAD18 E3 ubiquitin protein ligase
1979	ENSG00000167658	EEF2	eukaryotic translation elongation factor 2
1980	ENSG00000111224	PARP11	poly(ADP-ribose) polymerase family member 11
1981	ENSG00000154813	DPH3	diphthamide biosynthesis 3
1982	ENSG00000105323	HNRNPUL1	heterogeneous nuclear ribonucleoprotein U like 1
1983	ENSG00000275052	PPP4R3B	protein phosphatase 4 regulatory subunit 3B
1984	ENSG00000131828	PDHA1	pyruvate dehydrogenase E1 subunit alpha 1
1985	ENSG00000170631	ZNF16	zinc finger protein 16
1986	ENSG00000149554	CHEK1	checkpoint kinase 1
1987	ENSG00000166068	SPRED1	sprouty related EVH1 domain containing 1
1988	ENSG00000068120	COASY	Coenzyme A synthase
1989	ENSG00000205502	C2CD4B	C2 calcium dependent domain containing 4B
1990	ENSG00000093217	XYLB	xylulokinase
1991	ENSG00000156050	FAM161B	FAM161 centrosomal protein B
1992	ENSG00000163050	COQ8A	coenzyme Q8A
1993	ENSG00000136986	DERL1	derlin 1
1994	ENSG00000119950	MXI1	MAX interactor 1, dimerization protein
1995	ENSG00000235665	LINC00298	long intergenic non-protein coding RNA 298
1996	ENSG00000164040	PGRMC2	progesterone receptor membrane component 2
1997	ENSG00000058804	NDC1	NDC1 transmembrane nucleoporin
[truncated: 1,459 more rows]
