# Supplementary material for: GMEB2 Promotes the Growth of Colorectal Cancer by Activating ADRM1 Transcription and NF-κB Signalling and Is Positively Regulated by the m6A Reader YTHDF1
Source: Cancers (Basel). 2022 Dec 8;14(24):6046. doi: 10.3390/cancers14246046 (PMC9776391; doi:10.3390/cancers14246046)
Supplement: Supplementary file 1 [file cancers-14-06046-s001.zip › Supplementary Table S4.xlsx]

## Sheet: Sheet1
Supplementary Table S4
GMEB2 ChIP-seq dataset in GSE49402
	ENSEMBL	GENE SYMBOL	GENE NAME
1	ENSG00000278847	RP11-414C23.1	#NAME?
2	ENSG00000067646	ZFY	ZNF911 dataset_1543
3	ENSG00000131002	TXLNGY	CYorf15A,CYorf15B,TXLNG2P dataset_1543
4	ENSG00000180525	PRR26	C10orf108 dataset_1543
5	ENSG00000107929	LARP4B	KIAA0217,LARP5 dataset_1543
6	ENSG00000229869	RP11-363N22.2	#NAME?
7	ENSG00000107937	GTPBP4	CRFG,NGB,NOG1 dataset_1543
8	ENSG00000205740	RP11-363N22.3	#NAME?
9	ENSG00000067064	IDI1	IPP1,IPPI1 dataset_1543
10	ENSG00000047056	WDR37	#NAME?
11	ENSG00000107959	PITRM1	MP1,PreP dataset_1543
12	ENSG00000067082	KLF6	BCD1,CBA1,COPEB,CPBP,GBF,PAC1,ST12,ZF9 dataset_1543
13	ENSG00000165568	AKR1E2	AKR1CL2,AKRDC1,LoopADR,hTSP,htAKR dataset_1543
14	ENSG00000173848	NET1	ARHGEF8,NET1A dataset_1543
15	ENSG00000196372	ASB13	#NAME?
16	ENSG00000108021	FAM208B	C10orf18,bA318E3.2 dataset_1543
17	ENSG00000057608	GDI2	HEL-S-46e,RABGDIB dataset_1543
18	ENSG00000272764	RP11-318E3.9	#NAME?
19	ENSG00000134461	ANKRD16	#NAME?
20	ENSG00000134452	FBXO18	FBH1,Fbx18,hFBH1 dataset_1543
21	ENSG00000134453	RBM17	SPF45 dataset_1543
22	ENSG00000170525	PFKFB3	IPFK2,PFK2,iPFK-2 dataset_1543
23	ENSG00000201581	RN7SKP78	#NAME?
24	ENSG00000263628	MIR3155B	MIR3155,hsa-mir-3155a,mir-3155a dataset_1543
25	ENSG00000213994	RP11-414H17.5	#NAME?
26	ENSG00000151657	KIN	BTCD,KIN17,Rts2 dataset_1543
27	ENSG00000165629	ATP5C1	ATP5C,ATP5CL1 dataset_1543
28	ENSG00000181192	DHTKD1	AMOXAD,CMT2Q dataset_1543
29	ENSG00000065665	SEC61A2	#NAME?
30	ENSG00000265653	MIR548AK	#NAME?
31	ENSG00000165609	NUDT5	YSA1,YSA1H,YSAH1,hNUDT5 dataset_1543
32	ENSG00000151465	CDC123	C10orf7,D123 dataset_1543
33	ENSG00000237540	RP11-730A19.7	#NAME?
34	ENSG00000065328	MCM10	CNA43,DNA43,PRO2249 dataset_1543
35	ENSG00000107537	PHYH	LN1,LNAP1,PAHX,PHYH1,RD dataset_1543
36	ENSG00000086475	SEPHS1	SELD,SPS,SPS1 dataset_1543
37	ENSG00000185267	CDNF	ARMETL1 dataset_1543
38	ENSG00000187522	HSPA14	HSP70-4,HSP70L1 dataset_1543
39	ENSG00000272853	RP11-398C13.6	#NAME?
40	ENSG00000152455	SUV39H2	KMT1B dataset_1543
41	ENSG00000152457	DCLRE1C	A-SCID,DCLREC1C,RS-SCID,SCIDA,SNM1C dataset_1543
42	ENSG00000197889	MEIG1	SPATA39,bA2K17.3 dataset_1543
43	ENSG00000152464	RPP38	#NAME?
44	ENSG00000176236	C10orf111	#NAME?
45	ENSG00000152465	NMT2	#NAME?
46	ENSG00000107614	TRDMT1	DMNT2,DNMT2,MHSAIIP,PUMET,RNMT1 dataset_1543
47	ENSG00000165996	PTPLA	CAP,PTPLA dataset_1543
48	ENSG00000260589	STAM-AS1	locus3182 dataset_1543
49	ENSG00000136738	STAM	STAM-1,STAM1 dataset_1543
50	ENSG00000165995	CACNB2	CACNLB2,CAVB2,MYSB dataset_1543
51	ENSG00000152487	RP11-139J15.2	#NAME?
52	ENSG00000165997	ARL5B	ARL8 dataset_1543
53	ENSG00000078114	NEBL	LASP2,LNEBL dataset_1543
54	ENSG00000231920	NEBL-AS1	#NAME?
55	ENSG00000222071	MIR1915	MIRN1915,hsa-mir-1915 dataset_1543
56	ENSG00000204682	CASC10	C10orf114,bA418C1.3 dataset_1543
57	ENSG00000078403	MLLT10	AF10 dataset_1543
58	ENSG00000136770	DNAJC1	DNAJL1,ERdj1,HTJ1,MTJ1 dataset_1543
59	ENSG00000165312	OTUD1	DUBA7,OTDC1 dataset_1543
60	ENSG00000107863	ARHGAP21	ARHGAP10 dataset_1543
61	ENSG00000151023	ENKUR	C10orf63,CFAP106 dataset_1543
62	ENSG00000185875	THNSL1	TSH1 dataset_1543
63	ENSG00000279212	RP13-16H11.8	#NAME?
64	ENSG00000148459	PDSS1	COQ1,COQ10D2,DPS,SPS,TPRT,TPT,TPT 1,hDPS1 dataset_1543
65	ENSG00000107890	ANKRD26	THC2,bA145E8.1 dataset_1543
66	ENSG00000136758	YME1L1	FTSH,MEG4,PAMP,YME1L dataset_1543
67	ENSG00000120539	MASTL	GREATWALL,GW,GWL,MAST-L,THC2 dataset_1543
68	ENSG00000107897	ACBD5	#NAME?
69	ENSG00000262412	RP11-85G18.6	#NAME?
70	ENSG00000099246	RAB18	RAB18LI1,WARBM3 dataset_1543
71	ENSG00000254635	WAC-AS1	#NAME?
72	ENSG00000095787	WAC	BM-016,DESSH,PRO1741,Wwp4 dataset_1543
73	ENSG00000197321	SVIL	#NAME?
74	ENSG00000107968	MAP3K8	AURA2,COT,EST,ESTF,MEKK8,TPL2,Tpl-2,c-COT dataset_1543
75	ENSG00000183621	ZNF438	bA330O11.1 dataset_1543
76	ENSG00000223834	RP11-472N13.2	#NAME?
77	ENSG00000165322	ARHGAP12	#NAME?
78	ENSG00000170759	KIF5B	HEL-S-61,KINH,KNS,KNS1,UKHC dataset_1543
79	ENSG00000206660	Y_RNA	#NAME?
80	ENSG00000233825	RP11-135A24.4	#NAME?
81	ENSG00000120616	EPC1	Epl1 dataset_1543
82	ENSG00000222309	AL391839.1	#NAME?
83	ENSG00000229327	RP11-135A24.2	#NAME?
84	ENSG00000216937	CCDC7	BIOT2,BioT2-A,BioT2-B,BioT2-C,C10orf68 dataset_1543
85	ENSG00000150093	ITGB1	CD29,FNRB,GPIIA,MDF2,MSK12,VLA-BETA,VLAB dataset_1543
86	ENSG00000229656	RP11-462L8.1	#NAME?
87	ENSG00000099250	NRP1	BDCA4,CD304,NP1,NRP,VEGF165R dataset_1543
88	ENSG00000108094	CUL2	#NAME?
89	ENSG00000230534	RP11-297A16.2	#NAME?
90	ENSG00000095794	CREM	CREM-2,ICER,hCREM-2 dataset_1543
91	ENSG00000264780	MIR4683	#NAME?
92	ENSG00000177283	FZD8	#NAME?
93	ENSG00000198105	ZNF248	#NAME?
94	ENSG00000236514	RP11-162G10.5	#NAME?
95	ENSG00000120555	SEPT7P9	#NAME?
96	ENSG00000234420	ZNF37BP	KOX21,ZNF37B dataset_1543
97	ENSG00000196693	ZNF33B	KOX2,KOX31,ZNF11B dataset_1543
98	ENSG00000165733	BMS1	ACC,BMS1L dataset_1543
99	ENSG00000273008	RP11-351D16.3	#NAME?
100	ENSG00000169826	CSGALNACT2	CHGN2,ChGn-2,GALNACT-2,GALNACT2,PRO0082,beta4GalNAcT dataset_1543
101	ENSG00000169813	HNRNPF	HNRPF,OK/SW-cl.23,mcs94-1 dataset_1543
102	ENSG00000221400	U3	#NAME?
103	ENSG00000230555	RP11-517P14.2	#NAME?
104	ENSG00000243660	ZNF487	#NAME?
105	ENSG00000252532	RNU7-193P	#NAME?
106	ENSG00000196793	ZNF239	HOK-2,MOK2 dataset_1543
107	ENSG00000169740	ZNF32	KOX30 dataset_1543
108	ENSG00000165406	2022-03-08	CMIR,MARCH-VIII,MIR,RNF178,c-MIR dataset_1543
109	ENSG00000172671	ZFAND4	ANUBL1 dataset_1543
110	ENSG00000274209	ANTXRL	#NAME?
111	ENSG00000107643	MAPK8	JNK,JNK-46,JNK1,JNK1A2,JNK21B1/2,PRKM8,SAPK1,SAPK1c dataset_1543
112	ENSG00000225830	ERCC6	ARMD5,CKN2,COFS,COFS1,CSB,POF11,RAD26,UVSS1 dataset_1543
113	ENSG00000258838	ERCC6-PGBD3	#NAME?
114	ENSG00000197444	OGDHL	#NAME?
115	ENSG00000198964	SGMS1	MOB,MOB1,SMS1,TMEM23,hmob33 dataset_1543
116	ENSG00000226200	SGMS1-AS1	#NAME?
117	ENSG00000204147	ASAH2B	ASAH2C,ASAH2L,bA449O16.3,bA98I6.3 dataset_1543
118	ENSG00000122952	ZWINT	HZwint-1,KNTC2AP,SIP30,ZWINT1 dataset_1543
119	ENSG00000151151	IPMK	#NAME?
120	ENSG00000122873	CISD1	C10orf70,MDS029,ZCD1,mitoNEET dataset_1543
121	ENSG00000072401	UBE2D1	E2(17)KB1,SFT,UBC4/5,UBCH5,UBCH5A dataset_1543
122	ENSG00000151150	ANK3	ANKYRIN-G,MRT37 dataset_1543
123	ENSG00000254271	RP11-131N11.4	#NAME?
124	ENSG00000170312	CDK1	CDC2,CDC28A,P34CDC2 dataset_1543
125	ENSG00000181915	ADO	C10orf22 dataset_1543
126	ENSG00000238280	RP11-436D10.3	#NAME?
127	ENSG00000148572	NRBF2	COPR,COPR1,COPR2,NRBF-2 dataset_1543
128	ENSG00000272767	JMJD1C-AS1	#NAME?
129	ENSG00000171988	JMJD1C	KDM3C,TRIP-8,TRIP8 dataset_1543
130	ENSG00000096717	SIRT1	SIR2,SIR2L1,SIR2alpha dataset_1543
131	ENSG00000148634	HERC4	#NAME?
132	ENSG00000096746	HNRNPH3	2H9,HNRPH3 dataset_1543
133	ENSG00000108187	PBLD	HEL-S-306,MAWBP,MAWDBP dataset_1543
134	ENSG00000204130	RUFY2	RABIP4R,ZFYVE13 dataset_1543
135	ENSG00000138346	DNA2	DNA2L,hDNA2 dataset_1543
136	ENSG00000122912	SLC25A16	D10S105E,GDA,GDC,HGT.1,ML7,hML7 dataset_1543
137	ENSG00000107625	DDX50	GU2,GUB,RH-II/GuB,mcdrh dataset_1543
138	ENSG00000165732	DDX21	GUA,GURDB,RH-II/GU,RH-II/GuA dataset_1543
139	ENSG00000198954	KIAA1279	KBP,KIAA1279,TTC20 dataset_1543
140	ENSG00000214875	MED28P1	#NAME?
141	ENSG00000122958	VPS26A	HB58,Hbeta58,PEP8A,VPS26 dataset_1543
142	ENSG00000156515	HK1	HK,HK1-ta,HK1-tb,HK1-tc,HKD,HKI,HMSNR,HXK1,hexokinase dataset_1543
143	ENSG00000099282	TSPAN15	2700063A19Rik,NET-7,NET7,TM4SF15 dataset_1543
144	ENSG00000156521	TYSND1	NET41 dataset_1543
145	ENSG00000180817	PPA1	HEL-S-66p,IOPPP,PP,PP1,SID6-8061 dataset_1543
146	ENSG00000172731	LRRC20	#NAME?
147	ENSG00000224725	CEP57L1P1	#NAME?
148	ENSG00000148730	EIF4EBP2	4EBP2,PHASII dataset_1543
149	ENSG00000107719	PALD1	KIAA1274,PALD dataset_1543
150	ENSG00000230661	YY1P1	#NAME?
151	ENSG00000166224	SGPL1	S1PL,SPL dataset_1543
152	ENSG00000107731	UNC5B	UNC5H2,p53RDL1 dataset_1543
153	ENSG00000198246	SLC29A3	ENT3,HCLAP,HJCD,PHID dataset_1543
154	ENSG00000197746	PSAP	GLBA,SAP1 dataset_1543
155	ENSG00000138303	ASCC1	ASC1p50,CGI-18,SMABF2,p50 dataset_1543
156	ENSG00000166295	ANAPC16	APC16,C10orf104,CENP-27,MSAG,bA570G20.3 dataset_1543
157	ENSG00000168209	DDIT4	Dig2,REDD-1,REDD1 dataset_1543
158	ENSG00000269926	RP11-442H21.2	#NAME?
159	ENSG00000148719	DNAJB12	DJ10 dataset_1543
160	ENSG00000122884	P4HA1	P4HA dataset_1543
161	ENSG00000122882	ECD	GCR2,HSGT1,SGT1 dataset_1543
162	ENSG00000138286	FAM149B1	KIAA0974 dataset_1543
163	ENSG00000213551	DNAJC9	HDJC9,JDD1,SB73 dataset_1543
164	ENSG00000236756	DNAJC9-AS1	C10orf103,bA537A6.3 dataset_1543
165	ENSG00000182180	MRPS16	CGI-132,COXPD2,MRP-S16,RPMS16 dataset_1543
166	ENSG00000227540	RP11-152N13.5	#NAME?
167	ENSG00000156042	CFAP70	TTC18 dataset_1543
168	ENSG00000221817	PPP3CB-AS1	USP54-AS1 dataset_1543
169	ENSG00000107758	PPP3CB	CALNA2,CALNB,CNA2,PP2Bbeta dataset_1543
170	ENSG00000166348	USP54	C10orf29,bA137L10.3,bA137L10.4 dataset_1543
171	ENSG00000268584	RP11-464F9.20	#NAME?
172	ENSG00000242338	BMS1P4	#NAME?
173	ENSG00000242288	RP11-464F9.1	#NAME?
174	ENSG00000250959	GLUD1P3	C10orf102,GLUDP3 dataset_1543
175	ENSG00000235316	DUSP8P5	#NAME?
176	ENSG00000196968	FUT11	#NAME?
177	ENSG00000279689	RP11-574K11.32	#NAME?
178	ENSG00000166507	NDST2	#NAME?
179	ENSG00000272916	RP11-574K11.31	HSST2,NST2 dataset_1543
180	ENSG00000224195	RP11-574K11.5	#NAME?
181	ENSG00000035403	VCL	CMD1W,CMH15,HEL114,MV,MVCL dataset_1543
182	ENSG00000185009	AP3M1	#NAME?
183	ENSG00000156110	ADK	AK dataset_1543
184	ENSG00000156650	KAT6B	GTPTS,MORF,MOZ2,MYST4,ZC2HC6B,qkf,querkopf dataset_1543
185	ENSG00000156671	SAMD8	HEL-177,SMSr dataset_1543
186	ENSG00000165637	VDAC2	POR dataset_1543
187	ENSG00000165644	COMTD1	#NAME?
188	ENSG00000226051	ZNF503-AS1	#NAME?
189	ENSG00000233313	HMGA1P5	#NAME?
190	ENSG00000270087	ZNF503	#NAME?
191	ENSG00000237149	ZNF503-AS2	C10orf41,NCRNA00245 dataset_1543
192	ENSG00000272692	RP11-399K21.14	#NAME?
193	ENSG00000273248	RP11-399K21.13	#NAME?
194	ENSG00000138326	RPS24	DBA3,S24 dataset_1543
195	ENSG00000224596	ZMIZ1-AS1	#NAME?
196	ENSG00000108175	ZMIZ1	MIZ,RAI17,TRAFIP10,ZIMP10,hZIMP10 dataset_1543
197	ENSG00000108179	PPIF	CYP3,CyP-M,Cyp-D,CypD dataset_1543
198	ENSG00000165678	GHITM	DERP2,HSPC282,MICS1,My021,PTD010,TMBIM5 dataset_1543
199	ENSG00000271933	RP11-338I21.1	#NAME?
200	ENSG00000062650	WAPAL	FOE,KIAA0261,WAPAL dataset_1543
201	ENSG00000227896	RP11-77P6.2	#NAME?
202	ENSG00000272631	RP11-359E3.4	#NAME?
203	ENSG00000107779	BMPR1A	10q23del,ACVRLK3,ALK3,CD292,SKR5 dataset_1543
204	ENSG00000272734	ADIRF-AS1	#NAME?
205	ENSG00000148671	ADIRF	AFRO,APM2,C10orf116,apM-2 dataset_1543
206	ENSG00000173269	MMRN2	EMILIN-3,EMILIN3,ENDOGLYX-1 dataset_1543
207	ENSG00000122376	FAM35A	FAM35A1,bA163M19.1 dataset_1543
208	ENSG00000148672	GLUD1	GDH,GDH1,GLUD dataset_1543
209	ENSG00000107789	MINPP1	HIPER1,MINPP2,MIPP dataset_1543
210	ENSG00000223820	CFL1P1	CFLP1 dataset_1543
211	ENSG00000138138	ATAD1	AFDC1,FNP001,THORASE dataset_1543
212	ENSG00000171862	PTEN	10q23del,BZS,CWS1,DEC,GLM2,MHAM,MMAC1,PTEN1,TEP1 dataset_1543
213	ENSG00000227268	KLLN	CWS4,KILLIN dataset_1543
214	ENSG00000138134	STAMBPL1	ALMalpha,AMSH-FP,AMSH-LP,bA399O19.2 dataset_1543
215	ENSG00000235100	RP11-80H5.9	#NAME?
216	ENSG00000138182	KIF20B	CT90,KRMP1,MPHOSPH1,MPP-1,MPP1 dataset_1543
217	ENSG00000148688	RPP30	TSG15 dataset_1543
218	ENSG00000228701	TNKS2-AS1	#NAME?
219	ENSG00000107854	TNKS2	ARTD6,PARP-5b,PARP-5c,PARP5B,PARP5C,TANK2,TNKL,pART6 dataset_1543
220	ENSG00000272817	RP11-402D21.2	#NAME?
221	ENSG00000174721	FGFBP3	C10orf13,FGF-BP3 dataset_1543
222	ENSG00000095564	BTAF1	MOT1,TAF(II)170,TAF172,TAFII170 dataset_1543
223	ENSG00000107864	CPEB3	#NAME?
224	ENSG00000198060	2022-03-05	MARCH-V,MITOL,RNF153 dataset_1543
225	ENSG00000119912	IDE	INSULYSIN dataset_1543
226	ENSG00000138160	KIF11	EG5,HKSP,KNSL1,MCLMR,TRIP5 dataset_1543
227	ENSG00000184111	RP11-366I13.3	#NAME?
228	ENSG00000138180	CEP55	C10orf3,CT111,URCC6 dataset_1543
229	ENSG00000176273	SLC35G1	C10orf60,POST,TMEM20 dataset_1543
230	ENSG00000138193	PLCE1	NPHS3,PLCE,PPLC dataset_1543
231	ENSG00000173145	NOC3L	AD24,C10orf117,FAD24 dataset_1543
232	ENSG00000225533	PAWRP1	#NAME?
233	ENSG00000059573	ALDH18A1	ADCL3,ARCL3A,GSAS,P5CS,PYCS,SPG9,SPG9A,SPG9B dataset_1543
234	ENSG00000119977	TCTN3	C10orf61,JBTS18,OFD4,TECT3 dataset_1543
235	ENSG00000173088	C10orf131	#NAME?
236	ENSG00000226688	ENTPD1-AS1	#NAME?
237	ENSG00000107443	CCNJ	bA690P14.1 dataset_1543
238	ENSG00000095587	TLL2	#NAME?
239	ENSG00000077147	TM9SF3	EP70-P-iso,SMBP dataset_1543
240	ENSG00000207976	MIR607	MIRN607,hsa-mir-607 dataset_1543
241	ENSG00000196233	LCOR	C10orf12,MLR2 dataset_1543
242	ENSG00000213390	ARHGAP19	#NAME?
243	ENSG00000269891	ARHGAP19-SLIT1	#NAME?
244	ENSG00000277308	Metazoa_SRP	#NAME?
245	ENSG00000237169	RP11-452K12.3	#NAME?
246	ENSG00000165879	FRAT1	#NAME?
247	ENSG00000225850	RP11-452K12.4	#NAME?
248	ENSG00000181274	FRAT2	#NAME?
249	ENSG00000052749	RRP12	KIAA0690 dataset_1543
250	ENSG00000171314	PGAM1	HEL-S-35,PGAM-B,PGAMA dataset_1543
251	ENSG00000171311	EXOSC1	CGI-108,CSL4,Csl4p,SKI4,Ski4p,p13 dataset_1543
252	ENSG00000171307	ZDHHC16	APH2,DHHC-16 dataset_1543
253	ENSG00000155229	MMS19	MET18,MMS19L,hMMS19 dataset_1543
254	ENSG00000165886	UBTD1	#NAME?
255	ENSG00000171160	MORN4	C10orf83,bA548K23.4,rtp dataset_1543
256	ENSG00000155252	PI4K2A	PI4KII,PIK42A dataset_1543
257	ENSG00000119986	AVPI1	PP5395,VIP32,VIT32 dataset_1543
258	ENSG00000155254	MARVELD1	GB14,MARVD1,MRVLDC1,bA548K23.8 dataset_1543
259	ENSG00000155256	ZFYVE27	PROTRUDIN,SPG33 dataset_1543
260	ENSG00000166024	R3HCC1L	C10orf28,GIDRP86,GIDRP88,PSORT dataset_1543
261	ENSG00000119943	PYROXD2	MIRN1287,hsa-mir-1287,mir-1287 dataset_1543
262	ENSG00000107521	HPS1	BLOC3S1,HPS dataset_1543
263	ENSG00000120053	GOT1	AST1,ASTQTL1,GIG18,cAspAT,cCAT dataset_1543
264	ENSG00000224934	RP11-441O15.3	#NAME?
265	ENSG00000155287	SLC25A28	MFRN2,MRS3/4,MRS4L,NPD016 dataset_1543
266	ENSG00000260475	RP11-85A1.3	#NAME?
267	ENSG00000198018	ENTPD7	LALP1 dataset_1543
268	ENSG00000014919	COX15	CEMCOX2 dataset_1543
269	ENSG00000119929	CUTC	CGI-32 dataset_1543
270	ENSG00000107554	DNMBP	ARHGEF36,TUBA dataset_1543
271	ENSG00000107566	ERLIN1	C10orf69,Erlin-1,KE04,KEO4,SPFH1,SPG62 dataset_1543
272	ENSG00000216004	AL138921.1	#NAME?
273	ENSG00000213341	CHUK	IKBKA,IKK-alpha,IKK1,IKKA,NFKBIKA,TCF16 dataset_1543
274	ENSG00000227492	RP11-316M21.6	#NAME?
275	ENSG00000212464	SNORA12	U108 dataset_1543
276	ENSG00000231188	RP11-34D15.2	#NAME?
277	ENSG00000099194	SCD	FADS5,MSTP008,SCD1,SCDOS,hSCD1 dataset_1543
278	ENSG00000166135	HIF1AN	FIH1 dataset_1543
279	ENSG00000166136	NDUFB8	#NAME?
280	ENSG00000255339	RP11-411B6.6	ASHI,CI-ASHI dataset_1543
281	ENSG00000119906	FAM178A	C10orf6,FAM178A dataset_1543
282	ENSG00000272572	RP11-179B2.2	#NAME?
283	ENSG00000095539	SEMA4G	#NAME?
284	ENSG00000236662	RP11-108L7.4	#NAME?
285	ENSG00000055950	MRPL43	L43mt,MRP-L43,bMRP36a dataset_1543
286	ENSG00000107815	C10orf2	ATXN8,C10orf2,IOSCA,MTDPS7,PEO,PEO1,PEOA3,PRLTS5,SANDO,SCA8,TWINL dataset_1543
287	ENSG00000107816	LZTS2	LAPSER1 dataset_1543
288	ENSG00000186862	PDZD7	DFNB57,PDZK7 dataset_1543
289	ENSG00000107819	SFXN3	BA108L7.2,SFX3 dataset_1543
290	ENSG00000273162	RP11-108L7.15	#NAME?
291	ENSG00000107821	KAZALD1	BONO1,FKSG28,FKSG40,IGFBP-rP10 dataset_1543
292	ENSG00000166167	BTRC	BETA-TRCP,FBW1A,FBXW1,FBXW1A,FWD1,bTrCP,bTrCP1,betaTrCP dataset_1543
293	ENSG00000166169	POLL	BETAN,POLKAPPA dataset_1543
294	ENSG00000166171	DPCD	#NAME?
295	ENSG00000107829	FBXW4	DAC,FBW4,FBWD4,SHFM3,SHSF3 dataset_1543
296	ENSG00000107833	NPM3	PORMIN,TMEM123 dataset_1543
297	ENSG00000120049	KCNIP2	KCHIP2 dataset_1543
298	ENSG00000120029	C10orf76	#NAME?
299	ENSG00000166189	HPS6	BLOC2S3 dataset_1543
300	ENSG00000198728	LDB1	CLIM-2,CLIM2,LDB-1,NLI dataset_1543
301	ENSG00000148840	PPRC1	PRC dataset_1543
302	ENSG00000166197	NOLC1	NOPP130,NOPP140,NS5ATP13,P130 dataset_1543
303	ENSG00000119915	ELOVL3	CIG-30,CIG30 dataset_1543
304	ENSG00000107859	PITX3	ASMD,ASOD,CTPP4,CTRCT11,PTX3 dataset_1543
305	ENSG00000107862	GBF1	ARF1GEF dataset_1543
306	ENSG00000077150	NFKB2	CVID10,H2TF1,LYT-10,LYT10,NF-kB2,p100,p49/p100,p52 dataset_1543
307	ENSG00000059915	PSD	EFA6,EFA6A,PSD1,TYL dataset_1543
308	ENSG00000275957	AL121928.1	#NAME?
309	ENSG00000107872	FBXL15	FBXO37,Fbl15,JET,PSD dataset_1543
310	ENSG00000107874	CUEDC2	C10orf66,bA18I14.5 dataset_1543
311	ENSG00000202569	MIR146B	MIRN146B,miRNA146B,mir-146b dataset_1543
312	ENSG00000269609	RPARP-AS1	#NAME?
313	ENSG00000120055	C10orf95	#NAME?
314	ENSG00000138111	TMEM180	C10orf77,TMEM180,bA18I14.8 dataset_1543
315	ENSG00000138107	ACTR1A	ARP1,Arp1A,CTRN1 dataset_1543
316	ENSG00000107882	SUFU	PRO1280,SUFUH,SUFUXL dataset_1543
317	ENSG00000272933	RP11-47A8.5	#NAME?
318	ENSG00000171206	TRIM8	GERP,RNF27 dataset_1543
319	ENSG00000166272	WBP1L	C10orf26,OPA1L,OPAL1 dataset_1543
320	ENSG00000166275	C10orf32	#NAME?
321	ENSG00000270316	C10orf32-ASMT	C10orf32 dataset_1543
322	ENSG00000148842	CNNM2	ACDP2,HOMG6,HOMGSMR dataset_1543
323	ENSG00000156374	PCGF6	MBLR,RNF134 dataset_1543
324	ENSG00000148835	TAF5	TAF(II)100,TAF2D,TAFII-100,TAFII100 dataset_1543
325	ENSG00000221767	MIR1307	#NAME?
326	ENSG00000173915	USMG5	MIRN1307,hsa-mir-1307,mir-1307 dataset_1543
327	ENSG00000148843	PDCD11	ALG-4,ALG4,NFBP,RRP5 dataset_1543
328	ENSG00000107960	OBFC1	AAF-44,AAF44,OBFC1,RPA-32,bA541N10.2 dataset_1543
329	ENSG00000065613	SLK	LOSK,STK2,bA16H23.1,se20-9 dataset_1543
330	ENSG00000156384	SFR1	C10orf78,MEI5,MEIR5,bA373N18.1 dataset_1543
331	ENSG00000197748	CFAP43	C10orf79,WDR96,bA373N18.2 dataset_1543
332	ENSG00000148834	GSTO1	GSTO 1-1,GSTTLp28,HEL-S-21,P28,SPG-R dataset_1543
333	ENSG00000266852	MIR4482	MIR4482-1,hsa-mir-4482-1 dataset_1543
334	ENSG00000065621	GSTO2	GSTO 2-2,bA127L20.1 dataset_1543
335	ENSG00000148841	ITPRIP	DANGER,KIAA1754,bA127L20,bA127L20.2 dataset_1543
336	ENSG00000108039	XPNPEP1	APP1,SAMP,XPNPEP,XPNPEPL,XPNPEPL1 dataset_1543
337	ENSG00000148700	ADD3	ADDL,CPSQ3 dataset_1543
338	ENSG00000119950	MXI1	MAD2,MXD2,MXI,bHLHc11 dataset_1543
339	ENSG00000228417	RP11-549L6.3	#NAME?
340	ENSG00000119953	SMNDC1	SMNR,SPF30,TDRD16C dataset_1543
341	ENSG00000273143	RP11-525A16.4	#NAME?
342	ENSG00000138166	DUSP5	DUSP,HVH3 dataset_1543
343	ENSG00000108055	SMC3	BAM,BMH,CDLS3,CSPG6,HCAP,SMC3L1 dataset_1543
344	ENSG00000232470	RP11-313D6.3	#NAME?
345	ENSG00000150593	PDCD4	#NAME?
346	ENSG00000203497	PDCD4-AS1	#NAME?
347	ENSG00000214413	BBIP1	BBIP10,BBS18,NCRNA00081,bA348N5.3 dataset_1543
348	ENSG00000108061	SHOC2	SIAA0862,SOC2,SUR8 dataset_1543
349	ENSG00000119927	GPAM	GPAT,GPAT1 dataset_1543
350	ENSG00000023041	ZDHHC6	DHHC-6,ZNF376 dataset_1543
351	ENSG00000151532	VTI1A	MMDS3,MVti1,VTI1RP2,Vti1-rp2 dataset_1543
352	ENSG00000198924	DCLRE1A	PSO2,SNM1,SNM1A dataset_1543
353	ENSG00000196865	NHLRC2	#NAME?
354	ENSG00000238742	MIR2110	#NAME?
355	ENSG00000165813	CCDC186	hsa-mir-2110,mir-2110 dataset_1543
356	ENSG00000169129	AFAP1L2	CTB-1144G6.4,KIAA1914,XB130 dataset_1543
357	ENSG00000107518	ATRNL1	ALP,bA338L11.1,bA454H24.1 dataset_1543
358	ENSG00000187164	KIAA1598	#NAME?
359	ENSG00000165650	PDZD8	PDZK8 dataset_1543
360	ENSG00000177640	CASC2	C10orf5 dataset_1543
361	ENSG00000107560	RAB11FIP2	Rab11-FIP2,nRip11 dataset_1543
362	ENSG00000165669	FAM204A	C10orf84,bA319I23.1 dataset_1543
363	ENSG00000151893	CACUL1	C10orf46,CAC1 dataset_1543
364	ENSG00000107581	EIF3A	EIF3,EIF3S10,P167,TIF32,eIF3-p170,eIF3-theta,p180,p185 dataset_1543
365	ENSG00000183605	SFXN4	BCRM1,COXPD18 dataset_1543
366	ENSG00000148908	RGS10	#NAME?
367	ENSG00000151923	TIAL1	TCBP,TIAR dataset_1543
368	ENSG00000151929	BAG3	BAG-3,BIS,CAIR-1,MFM6 dataset_1543
369	ENSG00000198825	INPP5F	MSTP007,MSTPO47,SAC2,hSAC2 dataset_1543
370	ENSG00000197771	MCMBP	C10orf119,MCM-BP dataset_1543
371	ENSG00000120008	WDR11	BRWD2,DR11,HH14,SRI1,WDR15 dataset_1543
372	ENSG00000227165	WDR11-AS1	#NAME?
373	ENSG00000107669	ATE1	#NAME?
374	ENSG00000226864	ATE1-AS1	#NAME?
375	ENSG00000138162	TACC2	AZU-1,ECTACC dataset_1543
376	ENSG00000107679	PLEKHA1	TAPP1 dataset_1543
377	ENSG00000213185	FAM24B	#NAME?
378	ENSG00000255624	RP11-564D11.3	#NAME?
379	ENSG00000179988	PSTK	C10orf89 dataset_1543
380	ENSG00000154473	BUB3	BUB3L,hBUB3 dataset_1543
381	ENSG00000065154	OAT	GACR,HOGA,OATASE,OKT dataset_1543
382	ENSG00000107902	LHPP	HDHD2B dataset_1543
383	ENSG00000203791	METTL10	C10orf138 dataset_1543
384	ENSG00000249456	RP11-298J20.4	#NAME?
385	ENSG00000234134	RP11-383C5.5	#NAME?
386	ENSG00000224023	FLJ37035	#NAME?
387	ENSG00000107938	EDRF1	C10orf137 dataset_1543
388	ENSG00000188690	UROS	UROIIIS dataset_1543
389	ENSG00000107949	BCCIP	TOK-1,TOK1 dataset_1543
390	ENSG00000170430	MGMT	#NAME?
391	ENSG00000108001	EBF3	COE3,EBF-3,O/E-2,OE-2 dataset_1543
392	ENSG00000237489	LINC00959	#NAME?
393	ENSG00000233319	PPIAP32	#NAME?
394	ENSG00000108010	GLRX3	GLRX4,GRX3,GRX4,PICOT,TXNL2,TXNL3 dataset_1543
395	ENSG00000175470	PPP2R2D	MDS026 dataset_1543
396	ENSG00000148814	LRRC27	#NAME?
397	ENSG00000068383	INPP5A	5PTASE dataset_1543
398	ENSG00000151651	ADAM8	CD156,CD156a,MS2 dataset_1543
399	ENSG00000198546	ZNF511	#NAME?
400	ENSG00000130640	TUBGCP2	GCP-2,GCP2,Grip103,SPBC97,Spc97p,h103p,hGCP2,hSpc97 dataset_1543
401	ENSG00000165828	PRAP1	PRO1195,UPA dataset_1543
402	ENSG00000127884	ECHS1	ECHS1D,SCEH dataset_1543
403	ENSG00000274685	RP11-122K13.15	#NAME?
404	ENSG00000148832	PAOX	PAO dataset_1543
405	ENSG00000254536	RP11-108K14.8	#NAME?
406	ENSG00000148824	MTG1	GTP,GTPBP7 dataset_1543
407	ENSG00000247315	ZCCHC3	C20orf99 dataset_1543
408	ENSG00000225377	NRSN2-AS1	#NAME?
409	ENSG00000177732	SOX12	SOX22 dataset_1543
410	ENSG00000125841	NRSN2	C20orf98,dJ1103G7.6 dataset_1543
411	ENSG00000101255	TRIB3	C20orf97,NIPK,SINK,SKIP3,TRB3 dataset_1543
412	ENSG00000125875	TBC1D20	C20orf140,WARBM4 dataset_1543
413	ENSG00000271303	SRXN1	C20orf139,Npn3,SRX,SRX1 dataset_1543
414	ENSG00000125898	FAM110A	C20orf55,F10,bA371L19.3 dataset_1543
415	ENSG00000276026	RP4-545L17.11	#NAME?
416	ENSG00000125818	PSMF1	PI31 dataset_1543
417	ENSG00000276741	MIR6869	#NAME?
418	ENSG00000088832	FKBP1A	hsa-mir-6869 dataset_1543
419	ENSG00000274322	RP11-314N13.10	#NAME?
420	ENSG00000088833	NSFL1C	P47,UBX1,UBXD10,UBXN2C,dJ776F14.1 dataset_1543
421	ENSG00000125834	STK35	CLIK1,STK35L1 dataset_1543
422	ENSG00000088876	ZNF343	dJ734P14.5 dataset_1543
423	ENSG00000256566	RP4-734P14.4	#NAME?
424	ENSG00000101361	NOP56	MIRN1292,hsa-mir-1292,mir-1292 dataset_1543
425	ENSG00000221062	MIR1292	#NAME?
426	ENSG00000221116	SNORD110	HBII-55 dataset_1543
427	ENSG00000271798	SNORA51	ACA51 dataset_1543
428	ENSG00000212498	SNORD86	U86 dataset_1543
429	ENSG00000229686	SNORD56	RNU56,U56 dataset_1543
430	ENSG00000226572	SNORD57	RNU57,U57 dataset_1543
431	ENSG00000101365	IDH3B	RP46 dataset_1543
432	ENSG00000228293	RP4-686C3.7	#NAME?
433	ENSG00000132670	PTPRA	HEPTP,HLPR,HPTPA,HPTPalpha,LRP,PTPA,PTPRL2,R-PTP-alpha,RPTPA dataset_1543
434	ENSG00000125787	GNRH2	GnRH-II,LH-RHII dataset_1543
435	ENSG00000125901	MRPS26	C20orf193,GI008,MRP-S13,MRP-S26,MRPS13,NY-BR-87,RPMS13,dJ534B8.3 dataset_1543
436	ENSG00000088899	LZTS3;	PROSAPIP1 dataset_1543
437	ENSG00000198171	DDRGK1	C20orf116,UFBP1,dJ1187M17.3 dataset_1543
438	ENSG00000088836	SLC4A11	BTR1,CDPD1,CHED,CHED2,NABC1,dJ794I6.2 dataset_1543
439	ENSG00000277287	RP4-794I6.4	#NAME?
440	ENSG00000088812	ATRN	DPPT-L,MGCA dataset_1543
441	ENSG00000101220	C20orf27	#NAME?
442	ENSG00000101222	SPEF1	C20orf28,CLAMP,SPEF1A dataset_1543
443	ENSG00000125817	CENPB	#NAME?
444	ENSG00000101224	CDC25B	#NAME?
445	ENSG00000125843	AP5S1	C20orf29 dataset_1543
446	ENSG00000088888	MAVS	CARDIF,IPS-1,IPS1,VISA dataset_1543
447	ENSG00000125779	PANK2	C20orf48,HARP,HSS,NBIA1,PKAN dataset_1543
448	ENSG00000229539	RP11-119B16.2	#NAME?
449	ENSG00000089063	TMEM230	C20orf30,HSPC274,dJ1116H23.2.1 dataset_1543
450	ENSG00000132646	PCNA	ATLD2 dataset_1543
451	ENSG00000212517	SNORA26	#NAME?
452	ENSG00000101290	CDS2	#NAME?
453	ENSG00000125772	GPCPD1	EDI3,GDE5,GDPD6,PREI4 dataset_1543
454	ENSG00000089195	TRMT6	CGI-09,GCD10,Gcd10p dataset_1543
455	ENSG00000125885	MCM8	C20orf154,POF10,dJ967N21.5 dataset_1543
456	ENSG00000278719	MCM8-AS1	#NAME?
457	ENSG00000088766	CRLS1	C20orf155,CLS,CLS1,GCD10,dJ967N21.6 dataset_1543
458	ENSG00000101311	FERMT1	C20orf42,DTGCU2,KIND1,UNC112A,URP1 dataset_1543
459	ENSG00000125845	BMP2	BDA2,BMP2A dataset_1543
460	ENSG00000229766	RP5-971N18.3	#NAME?
461	ENSG00000125827	TMX4	DJ971N18.2,PDIA14,TXNDC13 dataset_1543
462	ENSG00000132623	ANKEF1	ANKRD5 dataset_1543
463	ENSG00000227906	SNAP25-AS1	#NAME?
464	ENSG00000125863	MKKS	BBS6,HMCS,KMS,MKS dataset_1543
465	ENSG00000149346	SLX4IP	C20orf94,bA204H22.1,bA254M13.1,dJ1099D15.3 dataset_1543
466	ENSG00000270792	RP11-103J8.1	#NAME?
467	ENSG00000101384	JAG1	AGS,AGS1,AHD,AWS,CD339,HJ1,JAGL1 dataset_1543
468	ENSG00000132640	BTBD3	dJ742J24.1 dataset_1543
469	ENSG00000089123	TASP1	C20orf13,dJ585I14.2 dataset_1543
470	ENSG00000089048	ESF1	ABTAP,C20orf6,HDCMC28P,bA526K24.1 dataset_1543
471	ENSG00000101247	NDUFAF5	C20orf7,bA526K24.2,dJ842G6.1 dataset_1543
472	ENSG00000101251	SEL1L2	C20orf50 dataset_1543
473	ENSG00000172264	MACROD2	C20orf133 dataset_1543
474	ENSG00000089177	KIF16B	C20orf23,KISC20ORF,SNX23 dataset_1543
475	ENSG00000276905	RP4-705D16.4	#NAME?
476	ENSG00000125870	SNRPB2	Msl1,U2B'' dataset_1543
477	ENSG00000228809	RP4-705D16.3	#NAME?
478	ENSG00000125864	BFSP1	#NAME?
479	ENSG00000125868	DSTN	ACTDP,ADF,HEL32,bA462D18.2 dataset_1543
480	ENSG00000125844	RRBP1	ES/130,ES130,RRp,hES dataset_1543
481	ENSG00000089006	SNX5	#NAME?
482	ENSG00000125871	MGME1	C20orf72,DDK1,MTDPS11,bA504H3.4 dataset_1543
483	ENSG00000125850	OVOL2	EUROIMAGE566589,PPCD1,ZNF339 dataset_1543
484	ENSG00000232838	PET117	CSRP2BP dataset_1543
485	ENSG00000149474	CSRP2BP	ATAC2,CRP2BP,CSRP2BP,PRO1194,dJ717M23.1 dataset_1543
486	ENSG00000125846	ZNF133	ZNF150,pHZ-13,pHZ-66 dataset_1543
487	ENSG00000089050	RBBP9	BOG,RBBP10 dataset_1543
488	ENSG00000214612	RPS19P1	#NAME?
489	ENSG00000101310	SEC23B	CDA-II,CDAII,CDAN2,CWS7,HEMPAS dataset_1543
490	ENSG00000125821	DTD1	C20orf88,DUE-B,DUEB,HARS2,pqn-68 dataset_1543
491	ENSG00000233895	RP1-122P22.2	#NAME?
492	ENSG00000268628	RP1-122P22.4	#NAME?
493	ENSG00000101343	CRNKL1	CLF,CRN,Clf1,HCRN,MSTP021,SYF3 dataset_1543
494	ENSG00000089101	CFAP61	C20orf26,CaM-IP3,dJ1002M8.3,dJ1178H5.4 dataset_1543
495	ENSG00000188559	RALGAPA2	AS250,C20orf74,bA287B20.1,dJ1049G11,dJ1049G11.4,p220 dataset_1543
496	ENSG00000088970	KIZ	C20orf19,HT013,Kizuna,NCRNA00153,PLK1S1,RP69 dataset_1543
497	ENSG00000088930	XRN2	#NAME?
498	ENSG00000275457	RP1-198K11.5	#NAME?
499	ENSG00000125798	FOXA2	HNF3B,TCF3B dataset_1543
500	ENSG00000132661	NXT1	MTR2,P15 dataset_1543
501	ENSG00000234832	RP3-322G13.7	#NAME?
502	ENSG00000232645	LINC01431	#NAME?
503	ENSG00000125812	GZF1	ZBTB23,ZNF336 dataset_1543
504	ENSG00000125814	NAPB	SNAP-BETA,SNAPB dataset_1543
505	ENSG00000101474	APMAP	BSCv,C20orf3 dataset_1543
506	ENSG00000154930	ACSS1	ACAS2L,ACECS1,AceCS2L dataset_1543
507	ENSG00000197586	ENTPD6	CD39L2,IL-6SAG,IL6ST2,NTPDase-6,dJ738P15.3 dataset_1543
508	ENSG00000100994	PYGB	GPBB dataset_1543
509	ENSG00000100997	ABHD12	ABHD12A,BEM46L2,C20orf22,PHARC,dJ965G21.2 dataset_1543
510	ENSG00000101003	GINS1	PSF1 dataset_1543
511	ENSG00000213742	ZNF337-AS1	#NAME?
512	ENSG00000170191	NANP	C20orf147,HDHD4,dJ694B14.3 dataset_1543
513	ENSG00000130684	ZNF337	#NAME?
514	ENSG00000101294	HM13	H13,IMP1,IMPAS,IMPAS-1,MSTP086,PSENL3,PSL3,SPP,SPPL1 dataset_1543
515	ENSG00000230613	HM13-AS1	#NAME?
516	ENSG00000125968	ID1	ID,bHLHb24 dataset_1543
517	ENSG00000264395	MIR3193	#NAME?
518	ENSG00000171552	BCL2L1	BCL-XL/S,BCL2L,BCLX,Bcl-X,PPP1R52 dataset_1543
519	ENSG00000088325	TPX2	C20orf1,C20orf2,DIL-2,DIL2,FLS353,GD:C20orf1,HCA519,HCTP4,REPP86,p100 dataset_1543
520	ENSG00000088356	PDRG1	C20orf126,PDRG dataset_1543
521	ENSG00000101337	TM9SF4	dJ836N17.2 dataset_1543
522	ENSG00000126003	PLAGL2	ZNF900 dataset_1543
523	ENSG00000101346	POFUT1	MIRN1825,hsa-mir-1825 dataset_1543
524	ENSG00000171456	ASXL1	BOPS,MDS dataset_1543
525	ENSG00000149600	COMMD7	C20orf92,dJ1085F17.3 dataset_1543
526	ENSG00000101367	MAPRE1	EB1 dataset_1543
527	ENSG00000101391	CDK5RAP1	C20orf34,C42,CGI-05,HSPC167 dataset_1543
528	ENSG00000078699	CBFA2T2	EHT,MTGR1,ZMYND3,p85 dataset_1543
529	ENSG00000101412	E2F1	E2F-1,RBAP1,RBBP3,RBP3 dataset_1543
530	ENSG00000275784	RP5-1125A11.6	#NAME?
531	ENSG00000228265	RALY-AS1	#NAME?
532	ENSG00000125970	RALY	HNRPCL2,P542 dataset_1543
533	ENSG00000125977	EIF2S2	EIF2,EIF2B,EIF2beta,PPP1R67,eIF-2-beta dataset_1543
534	ENSG00000214185	XPOTP1	#NAME?
535	ENSG00000101464	PIGU	CDC91L1,GAB1 dataset_1543
536	ENSG00000100991	TRPC4AP	C20orf188,PPP1R158,TRRP4AP,TRUSS dataset_1543
537	ENSG00000088298	EDEM2	C20orf31,C20orf49,bA4204.1 dataset_1543
538	ENSG00000126005	MMP24-AS1	#NAME?
539	ENSG00000261582	RP4-614O4.11	#NAME?
540	ENSG00000242372	EIF6	CAB,EIF3A,ITGB4BP,b(2)gcn,eIF-6,p27(BBP),p27BBP dataset_1543
541	ENSG00000235214	FAM83C-AS1	C20orf120,NCRNA00154,dJ614O4.3 dataset_1543
542	ENSG00000125998	FAM83C	C20orf128,dJ614O4.7 dataset_1543
543	ENSG00000221763	MIR1289-1	MIRN1289-1,hsa-mir-1289-1 dataset_1543
544	ENSG00000125965	GDF5	BDA1C,BMP-14,BMP14,CDMP1,LAP-4,LAP4,OS5,SYM1B,SYNS2 dataset_1543
545	ENSG00000126001	CEP250	C-NAP1,CEP2,CNAP1 dataset_1543
546	ENSG00000061656	SPAG4	CT127,SUN4 dataset_1543
547	ENSG00000214078	CPNE1	COPN1,CPN1 dataset_1543
548	ENSG00000244462	RBM12	HRIHFB2091,SWAN dataset_1543
549	ENSG00000244005	NFS1	HUSSY-08,IscS,NIFS dataset_1543
550	ENSG00000125995	ROMO1	C20orf52,MTGM,MTGMP,bA353C18.2 dataset_1543
551	ENSG00000131051	RBM39	CAPER,CAPERalpha,FSAP59,HCC1,RNPC2 dataset_1543
552	ENSG00000149646	CNBD2	C20orf152,CNMPD1 dataset_1543
553	ENSG00000171222	SCAND1	RAZ1,SDP1 dataset_1543
554	ENSG00000260032	LINC00657	LINC00657 dataset_1543
555	ENSG00000088367	EPB41L1	4.1N,MRD11 dataset_1543
556	ENSG00000101084	C20orf24	PNAS-11,RIP5 dataset_1543
557	ENSG00000101079	NDRG3	#NAME?
558	ENSG00000265441	AL132768.1	#NAME?
559	ENSG00000149636	DSN1	C20orf172,KNL3,MIS13,dJ469A13.2,hKNL-3 dataset_1543
560	ENSG00000149639	SOGA1	C20orf117,KIAA0889,SOGA dataset_1543
561	ENSG00000101347	SAMHD1	CHBL2,DCIP,HDDC1,MOP-5,SBBI88 dataset_1543
562	ENSG00000269846	RP4-621N11.2	#NAME?
563	ENSG00000080839	RBL1	CP107,PRB1,p107 dataset_1543
564	ENSG00000118705	RPN2	RIBIIR,RPN-II,RPNII,SWP1 dataset_1543
565	ENSG00000101353	MROH8	C20orf131,C20orf132,dJ621N11.3,dJ621N11.4 dataset_1543
566	ENSG00000101363	MANBAL	#NAME?
567	ENSG00000132792	CTNNBL1	C20orf33,NAP,P14L,PP8304,dJ633O20.1 dataset_1543
568	ENSG00000101407	TTI1	KIAA0406,smg-10 dataset_1543
569	ENSG00000101413	RPRD1B	C20orf77,CREPT,NET60,dJ1057B20.2 dataset_1543
570	ENSG00000196756	SNHG17	#NAME?
571	ENSG00000201512	SNORA71C	U71c dataset_1543
572	ENSG00000200354	SNORA71D	U71d dataset_1543
573	ENSG00000201811	SNORA71	#NAME?
574	ENSG00000174365	SNHG11	C20orf198,LINC00101,NCRNA00101 dataset_1543
575	ENSG00000274309	SNORA71E	ACA39,SNORA39 dataset_1543
576	ENSG00000199266	SNORA60	ACA60 dataset_1543
577	ENSG00000101442	ACTR5	Arp5,INO80M dataset_1543
578	ENSG00000101447	FAM83D	C20orf129,CHICA,dJ616B8.3 dataset_1543
579	ENSG00000261431	RP4-616B8.4	#NAME?
580	ENSG00000101452	DHX35	C20orf15,DDX35,KAIA0875 dataset_1543
581	ENSG00000277581	RP4-616B8.6	#NAME?
582	ENSG00000198900	TOP1	TOPI dataset_1543
583	ENSG00000124181	PLCG1	NCKAP3,PLC-II,PLC1,PLC148,PLCgamma1 dataset_1543
584	ENSG00000226648	PLCG1-AS1	TOP1-AS1 dataset_1543
585	ENSG00000124177	CHD6	CHD-6,CHD5,RIGB dataset_1543
586	ENSG00000124193	SRSF6	B52,HEL-S-91,SFRS6,SRP55 dataset_1543
587	ENSG00000101052	IFT52	C20orf9,CGI-53,NGD2,NGD5 dataset_1543
588	ENSG00000197296	FITM2	C20orf142,Fit2,dJ881L22.2 dataset_1543
589	ENSG00000226812	RP5-881L22.5	#NAME?
590	ENSG00000101076	HNF4A	FRTS4,HNF4,HNF4a7,HNF4a8,HNF4a9,HNF4alpha,MODY,MODY1,NR2A1,NR2A21,TCF,TCF14 dataset_1543
591	ENSG00000124120	TTPAL	C20orf121 dataset_1543
592	ENSG00000132824	SERINC3	AIGP1,DIFF33,SBBI99,TDE,TDE1,TMS-1 dataset_1543
593	ENSG00000168734	PKIG	PKI-gamma dataset_1543
594	ENSG00000196839	ADA	#NAME?
595	ENSG00000101104	PABPC1L	C20orf119,EPAB,PABPC1L1,dJ1069P2.3 dataset_1543
596	ENSG00000025772	TOMM34	HTOM34P,TOM34,URCC3 dataset_1543
597	ENSG00000227477	STK4-AS1	#NAME?
598	ENSG00000101109	STK4	KRS2,MST1,YSK3 dataset_1543
599	ENSG00000204070	SYS1	C20orf169,dJ453C12.4,dJ453C12.4.1 dataset_1543
600	ENSG00000254806	SYS1-DBNDD2	C20orf169-DBNDD2 dataset_1543
601	ENSG00000124251	TP53TG5	C20orf10,CLG01 dataset_1543
602	ENSG00000244274	DBNDD2	C20orf35,CK1BP,HSMNP1 dataset_1543
603	ENSG00000124155	PIGT	CGI-06,MCAHS3,NDAP,PNH2 dataset_1543
604	ENSG00000124116	WFDC3	WAP14,dJ447F3.3 dataset_1543
605	ENSG00000101457	DNTTIP1	C20orf167,Tdif1,dJ447F3.4 dataset_1543
606	ENSG00000175063	UBE2C	UBCH10,dJ447F3.2 dataset_1543
607	ENSG00000101473	ACOT8	HNAACTE,NAP1,PTE-1,PTE-2,PTE1,PTE2,hACTE-III,hTE dataset_1543
608	ENSG00000132801	ZSWIM3	C20orf164,PPP1R174 dataset_1543
609	ENSG00000149634	SPATA25	C20orf165,TSG23,dJ337O18.8 dataset_1543
610	ENSG00000064601	CTSA	GLB2,GSL,NGBE,PPCA,PPGB dataset_1543
611	ENSG00000124257	NEURL2	C20orf163,OZZ,OZZ-E3 dataset_1543
612	ENSG00000271984	RP3-337O18.9	#NAME?
613	ENSG00000100982	PCIF1	C20orf67,PPP1R121 dataset_1543
614	ENSG00000198026	ZNF335	MCPH10,NIF-1,NIF1,NIF2 dataset_1543
615	ENSG00000124160	NCOA5	CIA,bA465L10.6 dataset_1543
616	ENSG00000062598	ELMO2	CED-12,CED12,Ced-12A,ELMO-2,VMPI dataset_1543
617	ENSG00000124151	NCOA3	ACTR,AIB-1,AIB1,CAGH16,CTG26,KAT13B,RAC3,SRC-3,SRC3,TNRC14,TNRC16,TRAM-1,bHLHe42,pCIP dataset_1543
618	ENSG00000124198	ARFGEF2	BIG2,PVNH2,dJ1164I10.1 dataset_1543
619	ENSG00000227431	CSE1L-AS1	#NAME?
620	ENSG00000124207	CSE1L	CAS,CSE1,XPO2 dataset_1543
621	ENSG00000124201	ZNFX1	#NAME?
622	ENSG00000177410	ZFAS1	C20orf199,HSUP1,HSUP2,NCRNA00275,ZNFX1-AS1 dataset_1543
623	ENSG00000277830	ZNFX1-AS1_1	#NAME?
624	ENSG00000209042	SNORD12C	E2,E2-1,E3,RNU106,SNORD106,U106 dataset_1543
625	ENSG00000274760	ZNFX1-AS1_2	#NAME?
626	ENSG00000222365	SNORD12B	#NAME?
627	ENSG00000158470	B4GALT5	B4Gal-T5,BETA4-GALT-IV,beta4Gal-T5,beta4GalT-V,gt-V dataset_1543
628	ENSG00000197818	SLC9A8	NHE-8,NHE8 dataset_1543
629	ENSG00000158480	SPATA2	PD1,PPP1R145,tamo dataset_1543
630	ENSG00000124226	RNF114	PSORS12,ZNF313 dataset_1543
631	ENSG00000124216	SNAI1	SLUGH2,SNA,SNAH,SNAIL,SNAIL1,dJ710H13.1 dataset_1543
632	ENSG00000244687	UBE2V1	CIR1,CROC-1,CROC1,UBE2V,UEV-1,UEV1,UEV1A dataset_1543
633	ENSG00000124208	TMEM189-UBE2V1	CROC-1B,CROC1B,KUA-UEV dataset_1543
634	ENSG00000240849	TMEM189	KUA dataset_1543
635	ENSG00000172216	CEBPB	C/EBP-beta,IL6DBP,NF-IL6,TCF5 dataset_1543
636	ENSG00000277449	CEBPB-AS1	#NAME?
637	ENSG00000196396	PTPN1	PTP1B dataset_1543
638	ENSG00000124171	PARD6B	PAR6B dataset_1543
639	ENSG00000259456	ADNP-AS1	#NAME?
640	ENSG00000101126	ADNP	ADNP1,HVDAS,MRD28 dataset_1543
641	ENSG00000020256	ZFP64	ZNF338 dataset_1543
642	ENSG00000087586	AURKA	AIK,ARK1,AURA,BTAK,PPP1R47,STK15,STK6,STK7 dataset_1543
643	ENSG00000101138	CSTF1	CstF-50,CstFp50 dataset_1543
644	ENSG00000022277	RTFDC1	C20orf43,CDAO5,HSPC164,SHUJUN-3 dataset_1543
645	ENSG00000101146	RAE1	MIG14,MRNP41,Mnrp41,dJ481F12.3,dJ800J21.1 dataset_1543
646	ENSG00000124225	PMEPA1	STAG1,TMEPAI dataset_1543
647	ENSG00000278709	RP5-1059L7.1	#NAME?
648	ENSG00000124224	PPP4R1L	#NAME?
649	ENSG00000124209	RAB22A	#NAME?
650	ENSG00000124164	VAPB	ALS8,VAMP-B,VAP-B dataset_1543
651	ENSG00000124172	ATP5E	ATPE,MC5DN3 dataset_1543
652	ENSG00000101166	SLMO2	C20orf45,SLMO2,dJ543J19.5 dataset_1543
653	ENSG00000132825	PPP1R3D	PPP1R6 dataset_1543
654	ENSG00000196227	FAM217B	C20orf177,dJ551D2.5 dataset_1543
655	ENSG00000149657	LSM14B	C20orf40,FAM61B,FT005,LSM13,RAP55B,bA11M20.3 dataset_1543
656	ENSG00000280448	AL078633.1	#NAME?
657	ENSG00000101182	PSMA7	C6,HEL-S-276,HSPC,RC6-1,XAPC7 dataset_1543
658	ENSG00000184402	SS18L1	CREST,LP2261 dataset_1543
659	ENSG00000101181	MTG2	GTPBP5,ObgH1,dJ1005F21.2 dataset_1543
660	ENSG00000130703	OSBPL2	DFNA67,DNFA67,ORP-2,ORP2 dataset_1543
661	ENSG00000130706	ADRM1	ARM-1,ARM1,GP110 dataset_1543
662	ENSG00000273619	RP5-908M14.9	#NAME?
663	ENSG00000171858	RPS21	HLDF,S21 dataset_1543
664	ENSG00000101187	SLCO4A1	OATP-E,OATP1,OATP4A1,OATPE,OATPRP1,POAT,SLC21A12 dataset_1543
665	ENSG00000167046	RP11-93B14.6	#NAME?
666	ENSG00000277496	RP11-93B14.9	#NAME?
667	ENSG00000276317	RP11-93B14.10	#NAME?
668	ENSG00000101190	TCFL5	CHA,E2BP-1,Figlb,SOSF1,bHLHe82 dataset_1543
669	ENSG00000101191	DIDO1	BYE1,C20orf158,DATF-1,DATF1,DIDO2,DIDO3,DIO-1,DIO1,dJ885L7.8 dataset_1543
670	ENSG00000273759	RP4-563E14.1	#NAME?
671	ENSG00000101193	GID8	C20orf11,TWA1 dataset_1543
672	ENSG00000274915	HAR1A	#NAME?
673	ENSG00000231133	HAR1B	HAR1R,LINC00065,NCRNA00065 dataset_1543
674	ENSG00000149658	YTHDF1	C20orf21 dataset_1543
675	ENSG00000273821	RP5-963E22.6	#NAME?
676	ENSG00000101198	NKAIN4	C20orf58,FAM77A,bA261N11.2 dataset_1543
677	ENSG00000101199	ARFGAP1	ARF1GAP,HRIHFB2281 dataset_1543
678	ENSG00000125534	PPDPF	C20orf149,dJ697K14.9,exdpf dataset_1543
679	ENSG00000101216	GMEB2	GMEB-2,P79PIF,PIF79 dataset_1543
680	ENSG00000232442	CTD-3184A7.4	#NAME?
681	ENSG00000197457	STMN3	SCLIP dataset_1543
682	ENSG00000258366	RTEL1	C20orf41,DKCA4,DKCB5,NHL,PFBMFT3,RTEL dataset_1543
683	ENSG00000026036	RTEL1-TNFRSF6B	#NAME?
684	ENSG00000101246	ARFRP1	ARL18,ARP,Arp1 dataset_1543
685	ENSG00000197114	ZGPAT	#NAME?
686	ENSG00000183260	ABHD16B	C20orf135,dJ591C20.1 dataset_1543
687	ENSG00000268858	RP4-591C20.9	#NAME?
688	ENSG00000101150	TPD52L2	D54,TPD54 dataset_1543
689	ENSG00000101152	DNAJC5	CLN4,CLN4B,CSP,DNAJC5A,NCL,mir-941-2,mir-941-3,mir-941-4,mir-941-5 dataset_1543
690	ENSG00000280213	RP4-591C20.10	#NAME?
691	ENSG00000198276	UCKL1	MIRN1914,hsa-mir-1914 dataset_1543
692	ENSG00000130590	SAMD10	C20orf136,dJ591C20,dJ591C20.7 dataset_1543
693	ENSG00000101161	PRPF6	ANT-1,ANT1,C20orf14,Prp6,RP60,SNRNP102,TOM,U5-102K,hPrp6 dataset_1543
694	ENSG00000196421	LINC00176	NCRNA00176,PRR17 dataset_1543
695	ENSG00000196700	ZNF512B	GM632 dataset_1543
696	ENSG00000171703	TCEA2	TFIIS dataset_1543
697	ENSG00000203880	PCMTD2	C20orf36 dataset_1543
698	ENSG00000107099	DOCK8	HEL-205,MRD2,ZIR8 dataset_1543
699	ENSG00000183784	C9orf66	#NAME?
700	ENSG00000227155	RP11-165F24.3	#NAME?
701	ENSG00000107104	KANK1	ANKRD15,CPSQ2,KANK dataset_1543
702	ENSG00000080503	SMARCA2	BAF190,BRM,NCBRS,SNF2,SNF2L2,SNF2LA,SWI2,Sth1p,hBRM,hSNF2a dataset_1543
703	ENSG00000080298	RFX3	#NAME?
704	ENSG00000232104	RFX3-AS1	CVAT7 dataset_1543
705	ENSG00000107249	GLIS3	NDH,ZNF515 dataset_1543
706	ENSG00000228322	RP11-358M14.2	#NAME?
707	ENSG00000106688	SLC1A1	DCBXA,EAAC1,EAAT3,SCZD18 dataset_1543
708	ENSG00000273061	CDC37L1-AS1	#NAME?
709	ENSG00000106993	CDC37L1	CDC37B,HARC dataset_1543
710	ENSG00000147853	AK3	AK3L1,AK6,AKL3L,AKL3L1,FIX dataset_1543
711	ENSG00000120158	RCL1	RNAC,RPCL1 dataset_1543
712	ENSG00000096968	JAK2	JTK10,THCYT3 dataset_1543
713	ENSG00000107036	RIC1	CIP150,KIAA1432,bA207C16.1 dataset_1543
714	ENSG00000099219	ERMP1	FXNA,KIAA1815,bA207C16.3 dataset_1543
715	ENSG00000183354	KIAA2026	#NAME?
716	ENSG00000263575	MIR4665	mir-4665 dataset_1543
717	ENSG00000147854	UHRF2	NIRF,RNF107,TDRD23,URF2 dataset_1543
718	ENSG00000229611	RP11-390F4.10	#NAME?
719	ENSG00000225489	RP11-390F4.3	#NAME?
720	ENSG00000274527	RP11-146B14.1	#NAME?
721	ENSG00000107077	KDM4C	#NAME?
722	ENSG00000137038	TMEM261	C9orf123 dataset_1543
723	ENSG00000147862	NFIB	CTF,HMGIC/NFIB,NF-I/B,NF1-B,NFI-B,NFI-RED,NFIB2,NFIB3 dataset_1543
724	ENSG00000225472	RP11-120J1.1	#NAME?
725	ENSG00000155158	TTC39B	C9orf52 dataset_1543
726	ENSG00000164975	SNAPC3	PTFbeta,SNAP50 dataset_1543
727	ENSG00000164985	PSIP1	DFS70,LEDGF,PAIP,PSIP2,p52,p75 dataset_1543
728	ENSG00000164989	CCDC171	C9orf93,bA536D16.1,bA778P13.1 dataset_1543
729	ENSG00000044459	CNTLN	C9orf101,C9orf39,bA340N12.1 dataset_1543
730	ENSG00000137154	RPS6	S6 dataset_1543
731	ENSG00000227071	FOCAD-AS1	#NAME?
732	ENSG00000188352	FOCAD	KIAA1797 dataset_1543
733	ENSG00000099810	MTAP	BDMF,DMSFH,DMSMFH,HEL-249,LGMBF,MSAP,c86fus dataset_1543
734	ENSG00000264545	RP11-145E5.5	#NAME?
735	ENSG00000147889	CDKN2A	ARF,CDK4I,CDKN2,CMM2,INK4,INK4A,MLM,MTS-1,MTS1,P14,P14ARF,P16,P16-INK4A,P16INK4,P16INK4A,P19,P19ARF,TP16 dataset_1543
736	ENSG00000240498	CDKN2B-AS1	ANRIL,CDKN2B-AS,CDKN2BAS,NCRNA00089,PCAT12,p15AS dataset_1543
737	ENSG00000266446	RP11-149I2.4	#NAME?
738	ENSG00000147883	CDKN2B	CDK4I,INK4B,MTS2,P15,TP15,p15INK4b dataset_1543
739	ENSG00000215221	UBA52P6	#NAME?
740	ENSG00000096872	IFT74	BBS20,CCDC2,CMG-1,CMG1 dataset_1543
741	ENSG00000137055	PLAA	DOA1,PLA2P,PLAP dataset_1543
742	ENSG00000234676	IFT74-AS1	#NAME?
743	ENSG00000122729	ACO1	ACONS,HEL60,IREB1,IREBP,IREBP1,IRP1 dataset_1543
744	ENSG00000165264	NDUFB6	B17,CI dataset_1543
745	ENSG00000137074	APTX	AOA,AOA1,AXA1,EAOH,EOAHA,FHA-HIT dataset_1543
746	ENSG00000225693	LAGE3P1	#NAME?
747	ENSG00000086061	DNAJA1	DJ-2,DjA1,HDJ2,HSDJ,HSJ-2,HSJ2,HSPF4,NEDD7,hDJ-2 dataset_1543
748	ENSG00000233554	B4GALT1-AS1	#NAME?
749	ENSG00000086062	B4GALT1	B4GAL-T1,CDG2D,GGTB2,GT1,GTB,beta4Gal-T1 dataset_1543
750	ENSG00000107341	UBE2R2	CDC34B,E2-CDC34B,UBC3B dataset_1543
751	ENSG00000137073	UBAP2	UBAP-2 dataset_1543
752	ENSG00000222259	RN7SKP114	#NAME?
753	ENSG00000198876	DCAF12	CT102,KIAA1892,TCC52,WDR40A dataset_1543
754	ENSG00000165006	UBAP1	NAG20,UAP,UBAP,UBAP-1 dataset_1543
755	ENSG00000186638	KIF24	C9orf48,bA571F15.4 dataset_1543
756	ENSG00000164978	NUDT2	APAH1 dataset_1543
757	ENSG00000164976	KIAA1161	NET37 dataset_1543
758	ENSG00000122756	CNTFR	#NAME?
759	ENSG00000164967	RPP25L	C9orf23,bA296L22.5 dataset_1543
760	ENSG00000137100	DCTN3	DCTN-22,DCTN22 dataset_1543
761	ENSG00000205143	ARID3C	#NAME?
762	ENSG00000147955	SIGMAR1	ALS16,DSMA2,OPRS1,SIG-1R,SR-BP,SR-BP1,SRBP,hSigmaR1,sigma1R dataset_1543
763	ENSG00000213930	GALT	#NAME?
764	ENSG00000137094	DNAJB5	Hsc40 dataset_1543
765	ENSG00000165280	VCP	ALS14,CMT2Y,HEL-220,HEL-S-70,IBMPFD,IBMPFD1,TERA,p97 dataset_1543
766	ENSG00000221829	FANCG	FAG,XRCC9 dataset_1543
767	ENSG00000165283	STOML2	HSPC108,SLP-2 dataset_1543
768	ENSG00000005238	FAM214B	KIAA1539 dataset_1543
769	ENSG00000198722	UNC13B	MUNC13,UNC13,Unc13h2 dataset_1543
770	ENSG00000107140	TESK1	#NAME?
771	ENSG00000231393	RP11-331F9.3	#NAME?
772	ENSG00000227933	RP11-331F9.4	#NAME?
773	ENSG00000137101	CD72	CD72b,LYB2 dataset_1543
774	ENSG00000137078	SIT1	SIT,SIT-R dataset_1543
775	ENSG00000277027	RNase_MRP	CHH,NME1,RMRPR,RRP2 dataset_1543
776	ENSG00000269900	RMRP	#NAME?
777	ENSG00000159884	CCDC107	PSEC0222 dataset_1543
778	ENSG00000137135	ARHGEF39	C9orf100 dataset_1543
779	ENSG00000243136	RN7SL22P	#NAME?
780	ENSG00000107159	CA9	CAIX,MN dataset_1543
781	ENSG00000137076	TLN1	hsa-mir-6852 dataset_1543
782	ENSG00000107175	CREB3	LUMAN,LZIP,sLZIP dataset_1543
783	ENSG00000273945	MIR6853	hsa-mir-6853 dataset_1543
784	ENSG00000070610	GBA2	AD035,NLGase,SPG46 dataset_1543
785	ENSG00000107185	RGP1	KIAA0258 dataset_1543
786	ENSG00000137098	SPAG8	BS-84,CILD28,CT142,HSD-1,SMP1,SPAG3,hSMP-1 dataset_1543
787	ENSG00000263448	AL133410.1	#NAME?
788	ENSG00000137133	HINT2	HIT-17 dataset_1543
789	ENSG00000137103	TMEM8B	C9orf127,NAG-5,NAG5,NGX6 dataset_1543
790	ENSG00000204930	FAM221B	C9orf128 dataset_1543
791	ENSG00000122694	GLIPR2	C9orf19,GAPR-1,GAPR1 dataset_1543
792	ENSG00000122705	CLTA	LCA dataset_1543
793	ENSG00000137075	RNF38	#NAME?
794	ENSG00000165304	MELK	HPK38 dataset_1543
795	ENSG00000196092	PAX5	ALL3,BSAP dataset_1543
796	ENSG00000260100	RP11-220I1.5	#NAME?
797	ENSG00000147905	ZCCHC7	AIR1,HSPC086 dataset_1543
798	ENSG00000137106	GRHPR	GLXR,GLYD,PH2 dataset_1543
799	ENSG00000168795	ZBTB5	#NAME?
800	ENSG00000187988	KCTD9P3	#NAME?
801	ENSG00000137054	POLR1E	PAF53,PRAF1 dataset_1543
802	ENSG00000230188	RP11-405L18.4	#NAME?
803	ENSG00000107371	EXOSC3	CGI-102,PCH1B,RRP40,Rrp40p,bA3J10.7,hRrp-40,p10 dataset_1543
804	ENSG00000122741	DCAF10	WDR32 dataset_1543
805	ENSG00000122696	SLC25A51	CG7943,MCART1 dataset_1543
806	ENSG00000137124	ALDH1B1	ALDH5,ALDHX dataset_1543
807	ENSG00000276291	RP11-87H9.2	#NAME?
808	ENSG00000165060	FXN	CyaY,FA,FARR,FRDA,X25 dataset_1543
809	ENSG00000188647	PTAR1	#NAME?
810	ENSG00000107362	ABHD17B	C9orf77,CGI-67,FAM108B1 dataset_1543
811	ENSG00000155621	C9orf85	#NAME?
812	ENSG00000107372	ZFAND5	ZA20D2,ZFAND5A,ZNF216 dataset_1543
813	ENSG00000135045	C9orf40	#NAME?
814	ENSG00000203321	C9orf41-AS1	#NAME?
815	ENSG00000156017	C9orf41	C9orf41,UPF0586 dataset_1543
816	ENSG00000106733	NMRK1	C9orf95,NRK1,bA235O14.2 dataset_1543
817	ENSG00000134996	OSTF1	OSF,SH3P2,bA235O14.1 dataset_1543
818	ENSG00000135002	RFK	RIFK dataset_1543
819	ENSG00000187210	GCNT1	C2GNT,C2GNT-L,C2GNT1,G6NT,NACGT2,NAGCT2 dataset_1543
820	ENSG00000197969	VPS13A	CHAC,CHOREIN dataset_1543
821	ENSG00000232998	VPS13A-AS1	#NAME?
822	ENSG00000148019	CEP78	C9orf81,IP63 dataset_1543
823	ENSG00000135069	PSAT1	EPIP,NLS2,PSA,PSAT,PSATD dataset_1543
824	ENSG00000106829	TLE4	BCE-1,BCE1,E(spI),ESG,ESG4,GRG4,Grg-4 dataset_1543
825	ENSG00000196781	TLE1	ESG,ESG1,GRG1 dataset_1543
826	ENSG00000233926	RP11-154D17.1	#NAME?
827	ENSG00000172159	FRMD3	4.1O,EPB41L4O,EPB41LO,P410 dataset_1543
828	ENSG00000148057	IDNK	C9orf103,bA522I20.2,hGntK dataset_1543
829	ENSG00000254473	RP11-522I20.3	#NAME?
830	ENSG00000135018	UBQLN1	DA41,DSK2,PLIC-1,UBQN,XDRP1 dataset_1543
831	ENSG00000165115	KIF27	#NAME?
832	ENSG00000165119	HNRNPK	AUKS,CSBP,HNRPK,TUNP dataset_1543
833	ENSG00000178966	RMI1	BLAP75,C9orf76,FAAP75 dataset_1543
834	ENSG00000135049	AGTPBP1	CCP1,NNA1 dataset_1543
835	ENSG00000135040	NAA35	EGAP,MAK10,MAK10P,bA379P1.1 dataset_1543
836	ENSG00000135052	GOLM1	C9orf155,GOLPH2,GP73,HEL46,PSEC0257,bA379P1.3 dataset_1543
837	ENSG00000135070	ISCA1	HBLD2,ISA1,hIscA dataset_1543
838	ENSG00000083223	ZCCHC6	PAPD6,TUT7 dataset_1543
839	ENSG00000196730	DAPK1	DAPK dataset_1543
840	ENSG00000135047	CTSL	CATL,CTSL1,MEP dataset_1543
841	ENSG00000156345	CDK20	CCRK,CDCH,P42,PNQALRE dataset_1543
842	ENSG00000123975	CKS2	CKSHS2 dataset_1543
843	ENSG00000265112	MIR3153	mir-3153 dataset_1543
844	ENSG00000187742	SECISBP2	SBP2 dataset_1543
845	ENSG00000165023	DIRAS2	Di-Ras2 dataset_1543
846	ENSG00000165025	SYK	p72-Syk dataset_1543
847	ENSG00000148090	AUH	#NAME?
848	ENSG00000165030	NFIL3	E4BP4,IL3BP1,NF-IL3A,NFIL3A dataset_1543
849	ENSG00000233081	RP11-440G5.2	#NAME?
850	ENSG00000239183	SNORA84	#NAME?
851	ENSG00000196305	IARS	GRIDHH,IARS1,ILERS,ILRS,IRS,PRO0785 dataset_1543
852	ENSG00000198000	NOL8	C9orf34,NOP132,bA62C3.3,bA62C3.4 dataset_1543
853	ENSG00000188312	CENPP	CENP-P dataset_1543
854	ENSG00000127080	IPPK	C9orf12,INSP5K2,IP5K,IPK1,bA476B13.1 dataset_1543
855	ENSG00000185963	BICD2	SMALED2,bA526D8.1 dataset_1543
856	ENSG00000223446	RP11-274J16.5	#NAME?
857	ENSG00000165233	C9orf89	BinCARD,C9orf89 dataset_1543
858	ENSG00000165238	WNK2	NY-CO-43,P/OKcl.13,PRKWNK2,SDCCAG43 dataset_1543
859	ENSG00000158079	PTPDC1	PTP9Q22 dataset_1543
860	ENSG00000269946	RP11-2B6.3	#NAME?
861	ENSG00000175787	ZNF169	#NAME?
862	ENSG00000158169	FANCC	FA3,FAC,FACC dataset_1543
863	ENSG00000237857	RP11-435O5.2	#NAME?
864	ENSG00000185920	PTCH1	BCNS,HPE7,NBCCS,PTC,PTC1,PTCH,PTCH11 dataset_1543
865	ENSG00000271314	RP11-435O5.6	#NAME?
866	ENSG00000271155	RP11-435O5.5	#NAME?
867	ENSG00000271659	RP11-435O5.4	#NAME?
868	ENSG00000175611	LINC00476	C9orf130,NAG11,NAG12 dataset_1543
869	ENSG00000182150	ERCC6L2	BMFS2,C9orf102,RAD26L,SR278 dataset_1543
870	ENSG00000238251	RP11-172F4.2	#NAME?
871	ENSG00000165244	ZNF367	AFF29,CDC14B,ZFF29 dataset_1543
872	ENSG00000130956	HABP4	IHABP-4,IHABP4,Ki-1/57,SERBP1L dataset_1543
873	ENSG00000081377	CDC14B	CDC14B3,Cdc14B1,Cdc14B2,hCDC14B dataset_1543
874	ENSG00000196597	ZNF782	#NAME?
875	ENSG00000254876	RP11-23J9.5	#NAME?
876	ENSG00000255036	RP11-23J9.4	#NAME?
877	ENSG00000254483	RP11-23J9.6	#NAME?
878	ENSG00000203279	RP11-498P14.5	#NAME?
879	ENSG00000196116	TDRD7	CATC4,PCTAIRE2BP,TRAP dataset_1543
880	ENSG00000136932	C9orf156	C9orf156,HSPC219,NAP1 dataset_1543
881	ENSG00000136938	ANP32B	APRIL,PHAPI2,SSP29 dataset_1543
882	ENSG00000236896	RP11-535C21.3	#NAME?
883	ENSG00000095380	NANS	HEL-S-100,SAS,SEMDCG,SEMDG dataset_1543
884	ENSG00000106785	TRIM14	#NAME?
885	ENSG00000106789	CORO2A	CLIPINB,IR10,WDR2 dataset_1543
886	ENSG00000095383	TBC1D2	PARIS-1,PARIS1,TBC1D2A dataset_1543
887	ENSG00000106799	TGFBR1	AAT5,ACVRLK4,ALK-5,ALK5,ESS1,LDS1,LDS1A,LDS2A,MSSE,SKR4,TGFR-1,tbetaR-I dataset_1543
888	ENSG00000119523	ALG2	CDGIi,CMS14,CMSTA3,NET38,hALPG2 dataset_1543
889	ENSG00000106803	SEC61B	#NAME?
890	ENSG00000237461	RP11-554F20.1	#NAME?
891	ENSG00000119508	NR4A3	CHN,CSMF,MINOR,NOR1,TEC dataset_1543
892	ENSG00000023318	ERP44	PDIA10,TXNDC4 dataset_1543
893	ENSG00000119509	INVS	INV,NPH2,NPHP2 dataset_1543
894	ENSG00000136891	TEX10	Ipi1,bA208F1.2 dataset_1543
895	ENSG00000136897	MRPL50	MRP-L50 dataset_1543
896	ENSG00000136870	ZNF189	#NAME?
897	ENSG00000070214	SLC44A1	CD92,CDW92,CHTL1,CTL1 dataset_1543
898	ENSG00000106701	FSD1L	CCDC10,CSDUFD1,FSD1CL,FSD1NL,MIR1 dataset_1543
899	ENSG00000148143	ZNF462	Zfp462 dataset_1543
900	ENSG00000242631	RP11-508N12.4	#NAME?
901	ENSG00000119318	RAD23B	HHR23B,HR23B,P58 dataset_1543
902	ENSG00000276883	AL137852.1	#NAME?
903	ENSG00000136826	KLF4	EZF,GKLF dataset_1543
904	ENSG00000070061	IKBKAP	DYS,ELP1,FD,IKAP,IKI3,TOT1 dataset_1543
905	ENSG00000119328	FAM206A	C9orf6,CG-8,Simiate dataset_1543
906	ENSG00000106771	TMEM245	C9orf5,CG-2,CG2 dataset_1543
907	ENSG00000136810	TXN	TRDX,TRX,TRX1 dataset_1543
908	ENSG00000136813	KIAA0368	ECM29 dataset_1543
909	ENSG00000204173	LRRC37A5P	C9orf29 dataset_1543
910	ENSG00000059769	DNAJC25	bA16L21.2.1 dataset_1543
911	ENSG00000244115	DNAJC25-GNG10	#NAME?
912	ENSG00000148154	UGCG	GCS,GLCT1 dataset_1543
913	ENSG00000225513	RP11-165N19.2	#NAME?
914	ENSG00000106868	SUSD1	#NAME?
915	ENSG00000119314	PTBP3	ROD1 dataset_1543
916	ENSG00000230185	C9orf147	#NAME?
917	ENSG00000165185	KIAA1958	#NAME?
918	ENSG00000136866	ZFP37	ZNF906,zfp-37 dataset_1543
919	ENSG00000136867	SLC31A2	COPT2,CTR2,hCTR2 dataset_1543
920	ENSG00000119411	BSPRY	#NAME?
921	ENSG00000148218	ALAD	ALADH,PBGS dataset_1543
922	ENSG00000157653	C9orf43	#NAME?
923	ENSG00000148229	POLE3	CHARAC17,CHRAC17,YBL1,p17 dataset_1543
924	ENSG00000138835	RGS3	C2PA,RGP3 dataset_1543
925	ENSG00000106780	MEGF9	EGFL5 dataset_1543
926	ENSG00000226752	PSMD5-AS1	#NAME?
927	ENSG00000095261	PSMD5	S5B dataset_1543
928	ENSG00000119403	PHF19	MTF2L1,PCL3,TDRD19B dataset_1543
929	ENSG00000056558	TRAF1	EBI6,MGC:10353 dataset_1543
930	ENSG00000119397	CNTRL	CEP1,CEP110,FAN,bA165P4.1 dataset_1543
931	ENSG00000119396	RAB14	FBP,RAB-14 dataset_1543
932	ENSG00000243738	RN7SL181P	#NAME?
933	ENSG00000204136	GGTA1P	GGTA,GGTA1,GLYT2,a1/3GTP dataset_1543
934	ENSG00000175764	TTLL11	C9orf20,bA244O19.1 dataset_1543
935	ENSG00000119421	NDUFA8	CI-19KD,CI-PGIV,PGIV dataset_1543
936	ENSG00000185681	MORN5	C9orf113,C9orf18 dataset_1543
937	ENSG00000148187	MRRF	MRFF,MTRRF,RRF dataset_1543
938	ENSG00000119446	RBM18	#NAME?
939	ENSG00000056586	RC3H2	MNAB,RNF164 dataset_1543
940	ENSG00000171448	ZBTB26	ZNF481,bioref dataset_1543
941	ENSG00000165209	STRBP	HEL162,ILF3L,SPNR,p74 dataset_1543
942	ENSG00000119522	DENND1A	FAM31A,KIAA1608 dataset_1543
943	ENSG00000236643	RP11-175D17.3	#NAME?
944	ENSG00000148200	NR6A1	CT150,GCNF,GCNF1,NR61,RTR,hGCNF,hRTR dataset_1543
945	ENSG00000136918	WDR38	#NAME?
946	ENSG00000136942	RPL35	L35 dataset_1543
947	ENSG00000136950	ARPC5L	ARC16-2 dataset_1543
948	ENSG00000136935	GOLGA1	golgin-97 dataset_1543
949	ENSG00000119414	PPP6C	PP6,PP6C dataset_1543
950	ENSG00000044574	HSPA5	BIP,GRP78,HEL-S-89n,MIF2 dataset_1543
951	ENSG00000239705	RP11-65N13.8	#NAME?
952	ENSG00000165219	GAPVD1	GAPEX5,GAPex-5,RAP6 dataset_1543
953	ENSG00000214593	RP11-65N13.6	#NAME?
954	ENSG00000119487	MAPKAP1	JC310,MIP1,SIN1,SIN1b,SIN1g dataset_1543
955	ENSG00000229582	RP11-423C15.3	#NAME?
956	ENSG00000167081	PBX3	#NAME?
957	ENSG00000228487	RP13-225O21.2	#NAME?
958	ENSG00000136895	GARNL3	bA356B19.1 dataset_1543
959	ENSG00000136856	SLC2A8	GLUT8,GLUTX1 dataset_1543
960	ENSG00000196152	ZNF79	pT7 dataset_1543
961	ENSG00000160401	C9orf117	C9orf117 dataset_1543
962	ENSG00000187024	PTRH1	C9orf115,PTH1 dataset_1543
963	ENSG00000167094	TTC16	#NAME?
964	ENSG00000160404	TOR2A	TORP1 dataset_1543
965	ENSG00000136807	CDK9	BMND15,MIRN2861 dataset_1543
966	ENSG00000266070	MIR3960	#NAME?
967	ENSG00000136877	FPGS	#NAME?
968	ENSG00000167106	FAM102A	C9orf132,EEIG1,SYM-3A,bA203J24.7 dataset_1543
969	ENSG00000171169	NAIF1	C9orf90,bA379C10.2 dataset_1543
970	ENSG00000148339	SLC25A25	MCSC,PCSCL,SCAMC-2 dataset_1543
971	ENSG00000148334	PTGES2	C9orf15,GBF-1,GBF1,PGES2,mPGES-2 dataset_1543
972	ENSG00000232850	PTGES2-AS1	#NAME?
973	ENSG00000148337	CIZ1	LSFR1,NP94,ZNF356 dataset_1543
974	ENSG00000106976	DNM1	DNM,EIEE31 dataset_1543
975	ENSG00000175854	SWI5	C9orf119,SAE3 dataset_1543
976	ENSG00000167110	GOLGA2	GM130 dataset_1543
977	ENSG00000167112	TRUB2	CLONE24922 dataset_1543
978	ENSG00000167113	COQ4	CGI-92,COQ10D7 dataset_1543
979	ENSG00000167114	SLC27A4	ACSVL4,FATP4,IPS dataset_1543
980	ENSG00000223551	TMSB4XP4	#NAME?
981	ENSG00000136811	ODF2	CT134,ODF2/1,ODF2/2,ODF84 dataset_1543
982	ENSG00000119392	GLE1	GLE1L,LCCS,LCCS1,hGLE1 dataset_1543
983	ENSG00000228395	RP11-216B9.6	#NAME?
984	ENSG00000197694	SPTAN1	EIEE5,NEAS,SPTA2 dataset_1543
985	ENSG00000119333	WDR34	DIC5,FAP133,SRTD11,bA216B9.3 dataset_1543
986	ENSG00000234705	HMGA1P4	#NAME?
987	ENSG00000119335	SET	2PP2A,I2PP2A,IGAAD,IPP2A2,PHAPII,TAF-I,TAF-IBETA dataset_1543
988	ENSG00000160447	PKN3	UTDP4-1 dataset_1543
989	ENSG00000264438	RN7SL560P	#NAME?
990	ENSG00000160446	ZDHHC12	DHHC-12,ZNF400 dataset_1543
991	ENSG00000223478	RP11-545E17.3	#NAME?
992	ENSG00000160445	ZER1	C9orf60,ZYG,ZYG11BL dataset_1543
993	ENSG00000107021	TBC1D13	#NAME?
994	ENSG00000167136	ENDOG	#NAME?
995	ENSG00000198917	C9orf114	C9orf114,CENP-32,HSPC109 dataset_1543
996	ENSG00000171097	CCBL1	CCBL1,GTK,KAT1,KATI dataset_1543
997	ENSG00000136802	LRRC8A	AGM5,LRRC8,SWELL1 dataset_1543
998	ENSG00000175283	DOLK	CDG1M,DK,DK1,SEC59,TMEM15 dataset_1543
999	ENSG00000095319	NUP188	KIAA0169,hNup188 dataset_1543
1000	ENSG00000148343	FAM73B	C9orf54,FAM73B dataset_1543
1001	ENSG00000167130	DOLPP1	LSFR2 dataset_1543
1002	ENSG00000095321	CRAT	CAT,CAT1 dataset_1543
1003	ENSG00000119383	PPP2R4	PP2A,PPP2R4,PR53 dataset_1543
1004	ENSG00000268707	RP11-247A12.7	#NAME?
1005	ENSG00000268050	RP11-247A12.8	#NAME?
1006	ENSG00000204055	RP11-247A12.2	#NAME?
1007	ENSG00000188483	IER5L	bA247A12.2 dataset_1543
1008	ENSG00000204054	LINC00963	#NAME?
1009	ENSG00000148335	NTMT1	AD-003,C9orf32,HOMT1A,METTL11A,NRMT,NRMT1,NTM1A dataset_1543
1010	ENSG00000179058	C9orf50	#NAME?
1011	ENSG00000234789	RP11-483H20.4	#NAME?
1012	ENSG00000148331	ASB6	#NAME?
1013	ENSG00000136816	TOR1B	DQ1 dataset_1543
1014	ENSG00000136827	TOR1A	DQ2,DYT1 dataset_1543
1015	ENSG00000136819	C9orf78	HCA59,HSPC220,bA409K20.3 dataset_1543
1016	ENSG00000136878	USP20	LSFR3A,VDU2,hVDU2 dataset_1543
1017	ENSG00000224988	RP11-409K20.7	#NAME?
1018	ENSG00000148358	GPR107	GCDRP,LUSTR1,bA138E2.2 dataset_1543
1019	ENSG00000097007	ABL1	ABL,JTK7,bcr/abl,c-ABL,c-ABL1,p150,v-abl dataset_1543
1020	ENSG00000126883	NUP214	CAIN,CAN dataset_1543
1021	ENSG00000252622	RNU6-881P	#NAME?
1022	ENSG00000176868	RP11-334J6.7	#NAME?
1023	ENSG00000130714	POMT1	LGMD2K,MDDGA1,MDDGB1,MDDGC1,RT dataset_1543
1024	ENSG00000130717	UCK1	URK1 dataset_1543
1025	ENSG00000107290	SETX	ALS4,AOA2,SCAR1,bA479K20.2 dataset_1543
1026	ENSG00000125485	DDX31	PPP1R25 dataset_1543
1027	ENSG00000125484	GTF3C4	KAT12,TF3C-delta,TFIII90,TFIIIC290,TFIIIC90,TFIIICDELTA dataset_1543
1028	ENSG00000165698	C9orf9	C9orf9,Mast dataset_1543
1029	ENSG00000165695	AK8	AK 8,C9orf98,DDX31 dataset_1543
1030	ENSG00000165699	TSC1	LAM,TSC dataset_1543
1031	ENSG00000165702	GFI1B	BDPLT17,ZNF163B dataset_1543
1032	ENSG00000263816	MIR548AW	#NAME?
1033	ENSG00000148308	GTF3C5	TFIIIC63,TFIIICepsilon,TFiiiC2-63 dataset_1543
1034	ENSG00000160271	RALGDS	RGDS,RGF,RalGEF dataset_1543
1035	ENSG00000148296	SURF6	RRP14 dataset_1543
1036	ENSG00000230064	RP11-244N20.7	#NAME?
1037	ENSG00000148297	MED22	MED24,SURF5,surf-5 dataset_1543
1038	ENSG00000148303	RPL7A	L7A,SURF3,TRUP dataset_1543
1039	ENSG00000206611	SNORD24	RNU24,U24 dataset_1543
1040	ENSG00000200831	SNORD36B	RNU36B,U36b dataset_1543
1041	ENSG00000199744	SNORD36A	RNU36A,U36a dataset_1543
1042	ENSG00000252542	SNORD36C	RNU36C,U36c dataset_1543
1043	ENSG00000148290	SURF1	CMT4K dataset_1543
1044	ENSG00000148291	SURF2	SURF-2 dataset_1543
1045	ENSG00000148248	SURF4	ERV29 dataset_1543
1046	ENSG00000198870	STKLD1	C9orf96,SgK071,Sk521 dataset_1543
1047	ENSG00000148300	REXO4	REX4,XPMC2,XPMC2H dataset_1543
1048	ENSG00000160325	CACFD1	C9orf7,D9S2135,FLOWER dataset_1543
1049	ENSG00000160293	VAV2	VAV-2 dataset_1543
1050	ENSG00000235106	LINC00094	LP2477,NCRNA00094,bA374P20.3 dataset_1543
1051	ENSG00000196363	WDR5	BIG-3,CFAP89,SWD3 dataset_1543
1052	ENSG00000273249	LL09NC01-251B2.3	#NAME?
1053	ENSG00000221676	RNU6ATAC	RNU6ATAC1,U6ATAC dataset_1543
1054	ENSG00000160345	C9orf116	PIERCE1,RbEST47 dataset_1543
1055	ENSG00000122140	MRPS2	CGI-91,MRP-S2,S2mt dataset_1543
1056	ENSG00000130559	CAMSAP1	#NAME?
1057	ENSG00000238058	RP11-432J22.2	#NAME?
1058	ENSG00000130560	UBAC1	GBDR1,KPC2,UBADC1 dataset_1543
1059	ENSG00000148411	NACC2	BEND9,BTBD14,BTBD14A,BTBD31,NAC-2,RBB dataset_1543
1060	ENSG00000260193	RP11-83N9.5	#NAME?
1061	ENSG00000238227	C9orf69	#NAME?
1062	ENSG00000275329	RP11-83N9.6	#NAME?
1063	ENSG00000213221	DNLZ	C9orf151,HEP,HEP1,TIMM15,ZIM17,bA413M3.2 dataset_1543
1064	ENSG00000165684	SNAPC4	PTFalpha,SNAP190 dataset_1543
1065	ENSG00000165689	SDCCAG3	NY-CO-3 dataset_1543
1066	ENSG00000165688	PMPCA	Alpha-MPP,INPP5E,P-55,SCAR2 dataset_1543
1067	ENSG00000196366	C9orf163	#NAME?
1068	ENSG00000148396	SEC16A	KIAA0310,SEC16L,p250 dataset_1543
1069	ENSG00000148400	NOTCH1	AOS5,AOVD1,TAN1,hN1 dataset_1543
1070	ENSG00000237886	MIR4674HG	#NAME?
1071	ENSG00000265181	MIR4674	#NAME?
1072	ENSG00000233016	SNHG7	NCRNA00061 dataset_1543
1073	ENSG00000274998	SNORA17	#NAME?
1074	ENSG00000274356	RP11-216L13.21	#NAME?
1075	ENSG00000244187	TMEM141	#NAME?
1076	ENSG00000213213	CCDC183	KIAA1984,PARF,bA216L13.7 dataset_1543
1077	ENSG00000273066	RP11-216L13.19	#NAME?
1078	ENSG00000272679	RP11-216L13.18	#NAME?
1079	ENSG00000196642	RABL6	C9orf86,PARF,RBEL1,pp8875 dataset_1543
1080	ENSG00000228544	CCDC183-AS1	KIAA1984-AS1 dataset_1543
1081	ENSG00000232434	C9orf172	#NAME?
1082	ENSG00000054148	PHPT1	CGI-202,HEL-S-132P,HSPC141,PHP,PHP14 dataset_1543
1083	ENSG00000177943	MAMDC4	AEGP dataset_1543
1084	ENSG00000107223	EDF1	CFAP280,EDF-1,MBF1 dataset_1543
1085	ENSG00000127191	TRAF2	MGC:45012,TRAP,TRAP3 dataset_1543
1086	ENSG00000266507	MIR4479	#NAME?
1087	ENSG00000260190	RP11-229P13.25	#NAME?
1088	ENSG00000159069	FBXW5	Fbw5 dataset_1543
1089	ENSG00000176919	C8G	C8C dataset_1543
1090	ENSG00000184925	LCN12	#NAME?
1091	ENSG00000107281	NPDC1	CAB,CAB-,CAB-1,CAB1,NPDC-1 dataset_1543
1092	ENSG00000054179	ENTPD2	CD39L1,NTPDase-2 dataset_1543
1093	ENSG00000236394	RP11-229P13.15	#NAME?
1094	ENSG00000229257	RP11-229P13.22	#NAME?
1095	ENSG00000231864	RP11-229P13.23	#NAME?
1096	ENSG00000186193	SAPCD2	C9orf140,p42.3 dataset_1543
1097	ENSG00000197355	UAP1L1	#NAME?
1098	ENSG00000268996	MAN1B1-AS1	#NAME?
1099	ENSG00000177239	MAN1B1	ERMAN1,ERManI,MANA-ER,MRT15 dataset_1543
1100	ENSG00000199411	SNORD62	#NAME?
1101	ENSG00000176978	DPP7	DPP2,DPPII,QPP dataset_1543
1102	ENSG00000176884	GRIN1	GluN1,MRD8,NMD-R1,NMDA1,NMDAR1,NR1 dataset_1543
1103	ENSG00000263697	MIR3621	#NAME?
1104	ENSG00000184709	LRRC26	CAPC,bA350O14.10 dataset_1543
1105	ENSG00000185863	TMEM210	#NAME?
1106	ENSG00000176248	ANAPC2	APC2 dataset_1543
1107	ENSG00000176101	SSNA1	N14,NA-14,NA14 dataset_1543
1108	ENSG00000176058	TPRN	C9orf75,DFNB79 dataset_1543
1109	ENSG00000187713	TMEM203	HBEBP1 dataset_1543
1110	ENSG00000188566	NDOR1	#NAME?
1111	ENSG00000198569	SLC34A3	HHRH,NPTIIc dataset_1543
1112	ENSG00000188229	TUBB4B	Beta2,TUBB2,TUBB2C dataset_1543
1113	ENSG00000188163	FAM166A	HSD46 dataset_1543
1114	ENSG00000197768	C9orf173	C9orf173 dataset_1543
1115	ENSG00000275549	C9orf173-AS1	C9orf173-AS1 dataset_1543
1116	ENSG00000188986	NELFB	COBRA1,NELF-B dataset_1543
1117	ENSG00000260996	RP13-122B23.8	#NAME?
1118	ENSG00000198435	NRARP	#NAME?
1119	ENSG00000187609	EXD3	mut-7 dataset_1543
1120	ENSG00000188747	NOXA1	NY-CO-31,SDCCAG31,p51NOX dataset_1543
1121	ENSG00000165724	ZMYND19	MIZIP dataset_1543
1122	ENSG00000197070	ARRDC1	#NAME?
1123	ENSG00000203993	ARRDC1-AS1	C9orf37 dataset_1543
1124	ENSG00000181090	EHMT1	EUHMTASE1,Eu-HMTase1,FP13812,GLP,GLP1,KMT1D,bA188C12.1 dataset_1543
1125	ENSG00000177947	ODF3	CT135,SHIPPO1,TISP50 dataset_1543
1126	ENSG00000254559	RP11-304M2.5	#NAME?
1127	ENSG00000177951	BET1L	BET1L1,GOLIM3,GS15,HSPC197 dataset_1543
1128	ENSG00000177963	RIC8A	hsa-mir-6743 dataset_1543
1129	ENSG00000274298	MIR6743	#NAME?
1130	ENSG00000142082	SIRT3	SIR2L3 dataset_1543
1131	ENSG00000185627	PSMD13	HSPC027,Rpn9,S11,p40.5 dataset_1543
1132	ENSG00000184363	PKP3	#NAME?
1133	ENSG00000185187	SIGIRR	IL-1R8,TIR8 dataset_1543
1134	ENSG00000185101	ANO9	PIG5,TMEM16J,TP53I5 dataset_1543
1135	ENSG00000243562	RN7SL838P	#NAME?
1136	ENSG00000174915	PTDSS2	PSS2 dataset_1543
1137	ENSG00000023191	RNH1	RAI,RNH dataset_1543
1138	ENSG00000254739	RP13-46H24.1	#NAME?
1139	ENSG00000174775	HRAS	C-BAS/HAS,C-H-RAS,C-HA-RAS1,CTLO,H-RASIDX,HAMSV,HRAS1,RASH1,p21ras dataset_1543
1140	ENSG00000161328	LRRC56	#NAME?
1141	ENSG00000185522	LMNTD2	C11orf35 dataset_1543
1142	ENSG00000254815	RP11-496I9.1	#NAME?
1143	ENSG00000099849	RASSF7	C11orf13,HRAS1,HRC1 dataset_1543
1144	ENSG00000199038	MIR210	MIRN210,mir-210 dataset_1543
1145	ENSG00000247095	MIR210HG	#NAME?
1146	ENSG00000070047	PHRF1	PPP1R125,RNF221 dataset_1543
1147	ENSG00000177106	EPS8L2	EPS8R2 dataset_1543
1148	ENSG00000177042	TMEM80	#NAME?
1149	ENSG00000177030	DEAF1	MRD24,NUDR,SPN,ZMYND5 dataset_1543
1150	ENSG00000177156	TALDO1	TAL,TAL-H,TALDOR,TALH dataset_1543
1151	ENSG00000177225	PDDC1	#NAME?
1152	ENSG00000255284	AP006621.5	NS3BP dataset_1543
1153	ENSG00000279672	NS3BP	#NAME?
1154	ENSG00000255142	AP006621.6	#NAME?
1155	ENSG00000184524	CEND1	BM88 dataset_1543
1156	ENSG00000177542	SLC25A22	EIEE3,GC-1,GC1,NET44 dataset_1543
1157	ENSG00000274897	PANO	PANO dataset_1543
1158	ENSG00000177595	PIDD1	LRDD,PIDD dataset_1543
1159	ENSG00000177600	RPLP2	D11S2243E,LP2,P2,RPP2 dataset_1543
1160	ENSG00000199785	SNORA52	ACA52 dataset_1543
1161	ENSG00000177666	PNPLA2	1110001C14Rik,ATGL,FP17548,PEDF-R,TTS-2.2,TTS2,iPLA2zeta dataset_1543
1162	ENSG00000255108	AP006621.8	#NAME?
1163	ENSG00000177685	CRACR2B	EFCAB4A dataset_1543
1164	ENSG00000177697	CD151	GP27,MER2,PETA-3,RAPH,SFA1,TSPAN24 dataset_1543
1165	ENSG00000177700	POLR2L	RBP10,RPABC5,RPB10,RPB10beta,RPB7.6,hRPB7.6 dataset_1543
1166	ENSG00000214063	TSPAN4	NAG-2,NAG2,TETRASPAN,TM4SF7,TSPAN-4 dataset_1543
1167	ENSG00000177830	CHID1	GL008,SI-CLP,SICLP dataset_1543
1168	ENSG00000183020	AP2A2	ADTAB,CLAPA2,HIP-9,HIP9,HYPJ dataset_1543
1169	ENSG00000078902	TOLLIP	IL-1RAcPIP dataset_1543
1170	ENSG00000255153	TOLLIP-AS1	#NAME?
1171	ENSG00000174672	BRSK2	C11orf7,PEN11B,SAD1,SADA,STK29 dataset_1543
1172	ENSG00000117984	CTSD	CLN10,CPSD,HEL-S-130P dataset_1543
1173	ENSG00000229512	AC068580.5	#NAME?
1174	ENSG00000265587	AC068580.1	#NAME?
1175	ENSG00000149043	SYT8	#NAME?
1176	ENSG00000130595	TNNT3	TNTF dataset_1543
1177	ENSG00000214026	MRPL23	L23MRP,RPL23,RPL23L dataset_1543
1178	ENSG00000184281	TSSC4	#NAME?
1179	ENSG00000110628	SLC22A18	BWR1A,BWSCR1A,HET,IMPT1,ITM,ORCTL2,SLC22A1L,TSSC5,p45-BWR1A dataset_1543
1180	ENSG00000254827	SLC22A18AS	BWR1B,BWSCR1B,ORCTL2S,SLC22A1LS,p27-BWR1B dataset_1543
1181	ENSG00000181649	PHLDA2	BRW1C,BWR1C,HLDA2,IPL,TSSC3 dataset_1543
1182	ENSG00000205531	NAP1L4	NAP1L4b,NAP2,NAP2L,hNAP2 dataset_1543
1183	ENSG00000110619	CARS	CARS1,CYSRS,MGC:11246 dataset_1543
1184	ENSG00000005801	ZNF195	HRF1,ZNFP104 dataset_1543
1185	ENSG00000223756	TSSC2	#NAME?
1186	ENSG00000166492	FAM86GP	#NAME?
1187	ENSG00000110713	NUP98	ADIR2,NUP196,NUP96 dataset_1543
1188	ENSG00000148985	PGAP2	CWH43-N,FRAG1,HPMRS3,MRT17,MRT21 dataset_1543
1189	ENSG00000167325	RRM1	R1,RIR1,RR1 dataset_1543
1190	ENSG00000051009	FAM160A2	C11orf56 dataset_1543
1191	ENSG00000132259	CNGA4	CNCA2,CNG-4,CNG4,CNG5,CNGB2,OCNC2,OCNCBETA,OCNCb dataset_1543
1192	ENSG00000166311	SMPD1	ASM,ASMASE,NPD dataset_1543
1193	ENSG00000132275	RRP8	KIAA0409,NML dataset_1543
1194	ENSG00000166333	ILK	HEL-S-28,ILK-1,ILK-2,P59,p59ILK dataset_1543
1195	ENSG00000254400	RP11-732A19.8	#NAME?
1196	ENSG00000254641	RP11-732A19.2	#NAME?
1197	ENSG00000166337	TAF10	TAF2A,TAF2H,TAFII30 dataset_1543
1198	ENSG00000166340	TPP1	CLN2,GIG1,LPIC,SCAR7,TPP-1 dataset_1543
1199	ENSG00000255680	RP11-732A19.9	#NAME?
1200	ENSG00000158042	MRPL17	L17mt,LIP2,MRP-L17,MRP-L26,RPL17L,RPML26 dataset_1543
1201	ENSG00000149054	ZNF215	BAZ-2,BAZ2,ZKSCAN11,ZSCAN43 dataset_1543
1202	ENSG00000149050	ZNF214	BAZ-1,BAZ1 dataset_1543
1203	ENSG00000158077	NLRP14	CLR11.2,GC-LRR,NALP14,NOD5,PAN8 dataset_1543
1204	ENSG00000166441	RPL27A	L27A dataset_1543
1205	ENSG00000200983	SNORA45A	ACA3,SNORA3,SNORA45A dataset_1543
1206	ENSG00000166444	ST5	DENND2B,HTS1,p126 dataset_1543
1207	ENSG00000166452	AKIP1	BCA3,C11orf17 dataset_1543
1208	ENSG00000175348	TMEM9B	C11orf15 dataset_1543
1209	ENSG00000254860	TMEM9B-AS1	C11orf18 dataset_1543
1210	ENSG00000166471	TMEM41B	#NAME?
1211	ENSG00000205339	IPO7	Imp7,RANBP7 dataset_1543
1212	ENSG00000166478	ZNF143	SBF,STAF,pHZ-1 dataset_1543
1213	ENSG00000268403	CTD-2371O3.3	#NAME?
1214	ENSG00000166483	WEE1	WEE1A,WEE1hu dataset_1543
1215	ENSG00000245522	RP11-540A21.2	#NAME?
1216	ENSG00000246273	SBF2-AS1	#NAME?
1217	ENSG00000133812	SBF2	CMT4B2,DENND7B,MTMR13 dataset_1543
1218	ENSG00000254554	RP11-351I24.1	#NAME?
1219	ENSG00000148926	ADM	AM,PAMP dataset_1543
1220	ENSG00000133805	AMPD3	#NAME?
1221	ENSG00000110315	RNF141	ZFP26,ZNF230 dataset_1543
1222	ENSG00000177112	MRVI1-AS1	#NAME?
1223	ENSG00000198730	CTR9	SH2BP1,TSBP,p150,p150TSP dataset_1543
1224	ENSG00000110321	EIF4G2	AAG1,DAP5,NAT1,P97 dataset_1543
1225	ENSG00000246308	RP11-685M7.3	#NAME?
1226	ENSG00000170242	USP47	TRFP dataset_1543
1227	ENSG00000133816	MICAL2	MICAL-2,MICAL2PV1,MICAL2PV2 dataset_1543
1228	ENSG00000197702	PARVA	CH-ILKBP,MXRA2 dataset_1543
1229	ENSG00000187079	TEAD1	AA,NTEF-1,REF1,TCF-13,TCF13,TEAD-1,TEF-1 dataset_1543
1230	ENSG00000133794	ARNTL	BMAL1,BMAL1c,JAP3,MOP3,PASD3,TIC,bHLHe5 dataset_1543
1231	ENSG00000148925	BTBD10	GMRP-1,GMRP1 dataset_1543
1232	ENSG00000197601	FAR1	MLSTD2,PFCRD,SDR10E1 dataset_1543
1233	ENSG00000254791	FAR1-IT1	#NAME?
1234	ENSG00000186104	CYP2R1	#NAME?
1235	ENSG00000011405	PIK3C2A	CPK,PI3-K-C2(ALPHA),PI3-K-C2A,PI3K-C2-alpha,PI3K-C2alpha dataset_1543
1236	ENSG00000070081	NUCB2	HEL-S-109,NEFA dataset_1543
1237	ENSG00000129158	SERGEF	DELGEF,Gnefr dataset_1543
1238	ENSG00000074319	TSG101	TSG10,VPS23 dataset_1543
1239	ENSG00000151116	UEVLD	ATTP,UEV3 dataset_1543
1240	ENSG00000179119	SPTY2D1	Spt2 dataset_1543
1241	ENSG00000129173	E2F8	E2F-8 dataset_1543
1242	ENSG00000109881	CCDC34	L15,NY-REN-41,RAMA3 dataset_1543
1243	ENSG00000254862	RP11-159H22.2	#NAME?
1244	ENSG00000205213	LGR4	BNMD17,GPR48 dataset_1543
1245	ENSG00000148943	LIN7C	LIN-7-C,LIN-7C,MALS-3,MALS3,VELI3 dataset_1543
1246	ENSG00000245573	BDNF-AS	ANTI-BDNF,BDNF,BDNF-AS1,BDNFOS,NCRNA00049 dataset_1543
1247	ENSG00000121621	KIF18A	MS-KIF18A,PPP1R99 dataset_1543
1248	ENSG00000169519	METTL15	METT5D1 dataset_1543
1249	ENSG00000170959	DCDC1	#NAME?
1250	ENSG00000170946	DNAJC24	DPH4,JJJ3,ZCSL3 dataset_1543
1251	ENSG00000148950	IMMP1L	IMMP1,IMP1,IMP1-LIKE dataset_1543
1252	ENSG00000109911	ELP4	AN,AN2,C11orf19,PAX6NEB,PAXNEB,dJ68P15A.1,hELP4 dataset_1543
1253	ENSG00000049449	RCN1	#NAME?
1254	ENSG00000149100	EIF3M	B5,GA17,PCID1,TANGO7,hfl-B5 dataset_1543
1255	ENSG00000121690	DEPDC7	TR2,dJ85M6.4 dataset_1543
1256	ENSG00000176148	TCP11L1	dJ85M6.3 dataset_1543
1257	ENSG00000176102	CSTF3	CSTF-77 dataset_1543
1258	ENSG00000247151	CSTF3-AS1	#NAME?
1259	ENSG00000110422	HIPK3	DYRK6,FIST3,PKY,YAK1 dataset_1543
1260	ENSG00000135387	CAPRIN1	GPIAP1,GPIP137,GRIP137,M11S1,RNG105,p137GPI dataset_1543
1261	ENSG00000135372	NAT10	ALP,NET43 dataset_1543
1262	ENSG00000121691	CAT	#NAME?
1263	ENSG00000166326	TRIM44	AN3,DIPB,HSA249128,MC7 dataset_1543
1264	ENSG00000175104	TRAF6	MGC:3310,RNF85 dataset_1543
1265	ENSG00000280331	RP11-545D22.1	#NAME?
1266	ENSG00000166349	RAG1	RAG-1,RNF74 dataset_1543
1267	ENSG00000166181	API5	AAC-11,AAC11 dataset_1543
1268	ENSG00000052841	TTC17	#NAME?
1269	ENSG00000254907	RP11-484D2.2	#NAME?
1270	ENSG00000149084	HSD17B12	KAR,SDR12C1 dataset_1543
1271	ENSG00000019485	PRDM11	PFM8 dataset_1543
1272	ENSG00000181830	SLC35C1	CDG2C,FUCT1 dataset_1543
1273	ENSG00000121671	CRY2	HCRY2,PHLL2 dataset_1543
1274	ENSG00000121680	PEX16	PBD8A,PBD8B dataset_1543
1275	ENSG00000254639	CTD-2589M5.5	#NAME?
1276	ENSG00000255007	CTD-2589M5.4	#NAME?
1277	ENSG00000157613	CREB3L1	OASIS dataset_1543
1278	ENSG00000180423	HARBI1	C11orf77 dataset_1543
1279	ENSG00000175224	ATG13	KIAA0652,PARATARG8 dataset_1543
1280	ENSG00000175216	CKAP5	CHTOG,MSPS,TOG,TOGp,ch-TOG dataset_1543
1281	ENSG00000247675	LRP4-AS1	#NAME?
1282	ENSG00000149182	ARFGAP2	IRZ,NBLA10535,ZFP289,ZNF289 dataset_1543
1283	ENSG00000134575	ACP2	LAP dataset_1543
1284	ENSG00000025434	NR1H3	LXR-a,LXRA,RLD-1 dataset_1543
1285	ENSG00000110514	MADD	DENN,IG20,RAB3GEP dataset_1543
1286	ENSG00000256746	RP11-17G12.3	#NAME?
1287	ENSG00000165915	SLC39A13	LZT-Hs9 dataset_1543
1288	ENSG00000255197	RP11-750H9.5	#NAME?
1289	ENSG00000165916	PSMC3	TBP1 dataset_1543
1290	ENSG00000149187	CELF1	BRUNOL2,CUG-BP,CUGBP,CUGBP1,EDEN-BP,NAB50,NAPOR,hNab50 dataset_1543
1291	ENSG00000265559	RN7SL652P	#NAME?
1292	ENSG00000213619	NDUFS3	CI-30 dataset_1543
1293	ENSG00000110536	PTPMT1	DUSP23,MOSP,PLIP,PNAS-129 dataset_1543
1294	ENSG00000200376	RNU5E-10P	#NAME?
1295	ENSG00000231880	RP11-76I23.7	#NAME?
1296	ENSG00000123444	KBTBD4	BKLHD4,HSPC252 dataset_1543
1297	ENSG00000109919	MTCH2	HSPC032,MIMP,SLC25A50 dataset_1543
1298	ENSG00000109920	FNBP4	FBP30 dataset_1543
1299	ENSG00000030066	NUP160	#NAME?
1300	ENSG00000149115	TNKS1BP1	TAB182 dataset_1543
1301	ENSG00000254662	RP11-872D17.4	#NAME?
1302	ENSG00000255301	RP11-624G17.3	#NAME?
1303	ENSG00000149150	SLC43A1	LAT3,PB39,POV1,R00504 dataset_1543
1304	ENSG00000265566	RN7SL605P	#NAME?
1305	ENSG00000134809	TIMM10	TIM10,TIM10A,TIMM10A dataset_1543
1306	ENSG00000172409	CLP1	HEAB,hClp1 dataset_1543
1307	ENSG00000156599	ZDHHC5	DHHC5,ZNF375 dataset_1543
1308	ENSG00000211450	C11orf31	C11orf31,C17orf10,SELH dataset_1543
1309	ENSG00000110031	LPXN	LDPL dataset_1543
1310	ENSG00000186660	ZFP91	#NAME?
1311	ENSG00000255073	ZFP91-CNTF	DMS-8,DSM-8,FKSG11,PZF,ZFP-91,ZNF757 dataset_1543
1312	ENSG00000110042	DTX4	RNF155 dataset_1543
1313	ENSG00000110048	OSBP	OSBP1 dataset_1543
1314	ENSG00000255139	AP000442.1	#NAME?
1315	ENSG00000166889	PATL1	Pat1b,hPat1b dataset_1543
1316	ENSG00000255355	AP000640.2	#NAME?
1317	ENSG00000254477	AP000640.10	#NAME?
1318	ENSG00000166900	STX3	STX3A dataset_1543
1319	ENSG00000166902	MRPL16	L16mt,MRP-L16,PNAS-111 dataset_1543
1320	ENSG00000110107	PRPF19	NMP200,PRP19,PSO4,SNEV,UBOX4,hPSO4 dataset_1543
1321	ENSG00000257052	RP11-881M11.2	#NAME?
1322	ENSG00000110108	TMEM109	#NAME?
1323	ENSG00000256944	RP11-881M11.1	#NAME?
1324	ENSG00000006118	TMEM132A	GBP,HSPA5BP1 dataset_1543
1325	ENSG00000256196	RP11-881M11.4	#NAME?
1326	ENSG00000167987	VPS37C	#NAME?
1327	ENSG00000256591	RP11-286N22.8	C11orf79,PGL2,SDH5 dataset_1543
1328	ENSG00000149532	CPSF7	CFIm59 dataset_1543
1329	ENSG00000167985	SDHAF2	#NAME?
1330	ENSG00000011347	SYT7	IPCA-7,IPCA7,PCANAP7,SYT-VII,SYTVII dataset_1543
1331	ENSG00000134780	DAGLA	C11orf11,DAGL(ALPHA),DAGLALPHA,NSDDR dataset_1543
1332	ENSG00000149485	FADS1	MIRN1908,hsa-mir-1908,mir-1908 dataset_1543
1333	ENSG00000222326	MIR1908	#NAME?
1334	ENSG00000134824	FADS2	D6D,DES6,FADSD6,LLCDL2,SLL0262,TU13 dataset_1543
1335	ENSG00000221968	FADS3	CYB5RP,LLCDL3 dataset_1543
1336	ENSG00000167996	FTH1	FHC,FTH,FTHL6,HFE5,PIG15,PLIF dataset_1543
1337	ENSG00000279491	RP11-810P12.7	#NAME?
1338	ENSG00000149503	INCENP	#NAME?
1339	ENSG00000254772	EEF1G	EF1G,GIG35 dataset_1543
1340	ENSG00000255508	MIR3654	#NAME?
1341	ENSG00000149016	TUT1	PAPD2,RBM21,STARPAP,TUTase,URLC6 dataset_1543
1342	ENSG00000149480	MTA2	MTA1L1,PID dataset_1543
1343	ENSG00000149499	EML3	ELP95 dataset_1543
1344	ENSG00000254964	RP11-831H9.3	#NAME?
1345	ENSG00000149489	ROM1	ROM,ROSP1,RP7,TSPAN23 dataset_1543
1346	ENSG00000149541	B3GAT3	GLCATI,JDSCD,glcUAT-I dataset_1543
1347	ENSG00000089597	GANAB	G2AN,GIIA,GLUII,PKD3 dataset_1543
1348	ENSG00000185085	INTS5	INT5,KIAA1698 dataset_1543
1349	ENSG00000255432	RP11-831H9.11	#NAME?
1350	ENSG00000278615	C11orf98	C11orf48 dataset_1543
1351	ENSG00000214756	METTL12	U99HG dataset_1543
1352	ENSG00000206597	SNORA57	U99 dataset_1543
1353	ENSG00000162194	LBHD1	C11orf48 dataset_1543
1354	ENSG00000204922	UQCC3	C11orf83,CCDS41658.1,MC3DN9,UNQ655 dataset_1543
1355	ENSG00000168000	BSCL2	GNG3LG,HMN5,PELD,SPG17 dataset_1543
1356	ENSG00000162188	GNG3	#NAME?
1357	ENSG00000214753	HNRNPUL2	HNRPUL2,SAF-A2 dataset_1543
1358	ENSG00000234857	HNRNPUL2-BSCL2	#NAME?
1359	ENSG00000162222	TTC9C	#NAME?
1360	ENSG00000185670	ZBTB3	#NAME?
1361	ENSG00000168002	POLR2G	RPB19,RPB7,hRPB19,hsRPB7 dataset_1543
1362	ENSG00000162227	TAF6L	PAF65A dataset_1543
1363	ENSG00000267811	RP11-727F15.11	#NAME?
1364	ENSG00000269176	RP11-727F15.12	#NAME?
1365	ENSG00000185475	TMEM179B	hsa-mir-6748 dataset_1543
1366	ENSG00000274856	MIR6748	#NAME?
1367	ENSG00000168569	TMEM223	#NAME?
1368	ENSG00000274066	MIR6514	hsa-mir-6514,mir-6514 dataset_1543
1369	ENSG00000162231	NXF1	MEX67,TAP dataset_1543
1370	ENSG00000269463	RP11-727F15.13	#NAME?
1371	ENSG00000252361	RNU6-118P	#NAME?
1372	ENSG00000162236	STX5	SED5,STX5A dataset_1543
1373	ENSG00000256690	RP11-727F15.9	#NAME?
1374	ENSG00000133316	WDR74	#NAME?
1375	ENSG00000222328	RNU2-2P	#NAME?
1376	ENSG00000277194	SNORD22	RNU22,U22 dataset_1543
1377	ENSG00000255717	SNHG1	LINC00057,NCRNA00057,U22HG,UHG dataset_1543
1378	ENSG00000277846	SNORD30	RNU30,U30 dataset_1543
1379	ENSG00000274544	SNORD28	RNU28,SNORD28A,U28 dataset_1543
1380	ENSG00000275996	SNORD27	RNU27,U27 dataset_1543
1381	ENSG00000276788	SNORD26	RNU26,U26 dataset_1543
1382	ENSG00000275043	SNORD25	RNU25,U25 dataset_1543
1383	ENSG00000168003	SLC3A2	4F2,4F2HC,4T2HC,CD98,CD98HC,MDU1,NACAE dataset_1543
1384	ENSG00000176485	PLA2G16	AdPLA,H-REV107-1,HRASLS3,HREV107,HREV107-1,HREV107-3,HRSL3 dataset_1543
1385	ENSG00000203520	RP11-697H9.3	#NAME?
1386	ENSG00000133318	RTN3	ASYIP,HAP,NSPL2,NSPLII,RTN3-A1 dataset_1543
1387	ENSG00000110583	NAA40	NAT11,PATT1 dataset_1543
1388	ENSG00000176340	COX8A	COX,COX8,COX8-2,COX8L,VIII,VIII-L dataset_1543
1389	ENSG00000256100	AP000721.4	#NAME?
1390	ENSG00000133315	MACROD1	LRP16 dataset_1543
1391	ENSG00000168439	STIP1	HEL-S-94n,HOP,IEF-SSP-3521,P60,STI1,STI1L dataset_1543
1392	ENSG00000149781	FERMT3	KIND3,MIG-2,MIG2B,UNC112C,URP2,URP2SF dataset_1543
1393	ENSG00000149743	TRPT1	#NAME?
1394	ENSG00000149761	NUDT22	#NAME?
1395	ENSG00000110011	DNAJC4	DANJC4,HSPF2,MCG18 dataset_1543
1396	ENSG00000256116	RP11-783K16.14	#NAME?
1397	ENSG00000173511	VEGFB	VEGFL,VRF dataset_1543
1398	ENSG00000173486	FKBP2	FKBP-13,PPIase dataset_1543
1399	ENSG00000173457	PPP1R14B	PHI-1,PLCB3N,PNG,SOM172 dataset_1543
1400	ENSG00000256940	RP11-783K16.5	#NAME?
1401	ENSG00000257086	RP11-783K16.13	#NAME?
1402	ENSG00000149782	PLCB3	#NAME?
1403	ENSG00000173264	GPR137	C11orf4,GPR137A,TM7SF1L1 dataset_1543
1404	ENSG00000002330	BAD	BBC2,BCL2L8 dataset_1543
1405	ENSG00000182450	KCNK4	K2p4.1,TRAAK,TRAAK1 dataset_1543
1406	ENSG00000257069	RP11-783K16.10	#NAME?
1407	ENSG00000219435	TEX40	#NAME?
1408	ENSG00000173153	ESRRA	ERR1,ERRa,ERRalpha,ESRL1,NR3B1 dataset_1543
1409	ENSG00000278148	AP001453.1	#NAME?
1410	ENSG00000173113	TRMT112	HSPC152,HSPC170,TRM112,TRMT11-2,hTrm112 dataset_1543
1411	ENSG00000168066	SF1	BBP,D11S636,MBBP,ZCCHC25,ZFM1,ZNF162 dataset_1543
1412	ENSG00000269038	AP001462.6	#NAME?
1413	ENSG00000133895	MEN1	MEAI,SCG2 dataset_1543
1414	ENSG00000171219	CDC42BPG	DMPK2,HSMDPKIN,KAPPA-200,MRCKG,MRCKgamma dataset_1543
1415	ENSG00000110047	EHD1	H-PAST,HPAST1,PAST,PAST1 dataset_1543
1416	ENSG00000230835	AP001187.11	#NAME?
1417	ENSG00000274314	MIR6749	hsa-mir-6749 dataset_1543
1418	ENSG00000110046	ATG2A	#NAME?
1419	ENSG00000068971	PPP2R5B	B56B,PR61B dataset_1543
1420	ENSG00000149735	GPHA2	A2,GPA2,ZSIG51 dataset_1543
1421	ENSG00000213465	ARL2	ARFL2 dataset_1543
1422	ENSG00000273003	ARL2-SNX15	#NAME?
1423	ENSG00000278851	MIR6879	hsa-mir-6879 dataset_1543
1424	ENSG00000270775	AP000436.4	#NAME?
1425	ENSG00000110025	SNX15	HSAF001435 dataset_1543
1426	ENSG00000168061	SAC3D1	HSU79266,SHD1 dataset_1543
1427	ENSG00000168060	NAALADL1	I100,NAALADASEL dataset_1543
1428	ENSG00000146670	CDCA5	SORORIN dataset_1543
1429	ENSG00000162300	ZFPL1	D11S750,MCG4 dataset_1543
1430	ENSG00000187066	TMEM262	#NAME?
1431	ENSG00000149823	VPS51	ANG2,ANG3,C11orf2,C11orf3,FFR dataset_1543
1432	ENSG00000254501	AP003068.9	#NAME?
1433	ENSG00000149809	TM7SF2	ANG1,DHCR14A,NET47 dataset_1543
1434	ENSG00000255173	AP003068.12	#NAME?
1435	ENSG00000174276	ZNHIT2	C11orf5,FON dataset_1543
1436	ENSG00000278952	RP11-399J13.2	#NAME?
1437	ENSG00000149806	FAU	FAU1,Fub1,Fubi,MNSFbeta,RPS30,S30,asr1 dataset_1543
1438	ENSG00000149792	MRPL49	C11orf4,L49mt,MRP-L49,NOF,NOF1 dataset_1543
1439	ENSG00000277547	MIR6751	#NAME?
1440	ENSG00000162298	SYVN1	hsa-mir-6751 dataset_1543
1441	ENSG00000014138	POLA2	#NAME?
1442	ENSG00000149798	CDC42EP2	BORG1,CEP2 dataset_1543
1443	ENSG00000133884	DPF2	REQ,UBID4,ubi-d4 dataset_1543
1444	ENSG00000173825	TIGD3	#NAME?
1445	ENSG00000255478	RP11-867O8.5	#NAME?
1446	ENSG00000162241	SLC25A45	#NAME?
1447	ENSG00000126391	FRMD8	FKSG44 dataset_1543
1448	ENSG00000245532	NEAT1	LINC00084,NCRNA00084,TncRNA,VINC dataset_1543
1449	ENSG00000278144	NEAT1_1	#NAME?
1450	ENSG00000278050	NEAT1_2	#NAME?
1451	ENSG00000277599	NEAT1_3	#NAME?
1452	ENSG00000279243	CMB9-22P13.2	#NAME?
1453	ENSG00000251562	MALAT1	#NAME?
1454	ENSG00000270117	AP000769.7	#NAME?
1455	ENSG00000142186	SCYL1	GKLP,HT019,NKTL,NTKL,P105,SCAR21,TAPK,TEIF,TRAP dataset_1543
1456	ENSG00000168056	LTBP3	DASS,LTBP-3,LTBP2,STHAG6,pp6425 dataset_1543
1457	ENSG00000279093	RP11-856B14.10	#NAME?
1458	ENSG00000260233	SSSCA1-AS1	#NAME?
1459	ENSG00000173465	SSSCA1	p27 dataset_1543
1460	ENSG00000176973	FAM89B	LRAP25,MTVR,MTVR1 dataset_1543
1461	ENSG00000173039	RELA	NFKB3,p65 dataset_1543
1462	ENSG00000172922	RNASEH2C	AGS3,AYP1 dataset_1543
1463	ENSG00000172757	CFL1	CFL,HEL-S-15,cofilin dataset_1543
1464	ENSG00000172732	MUS81	SLX3 dataset_1543
1465	ENSG00000172638	EFEMP2	ARCL1B,FBLN4,MBP1,UPH1 dataset_1543
1466	ENSG00000172543	CTSW	LYPN dataset_1543
1467	ENSG00000172500	FIBP	FGFIBP,FIBP-1,TROFAS dataset_1543
1468	ENSG00000175602	CCDC85B	DIPA dataset_1543
1469	ENSG00000175592	FOSL1	FRA,FRA1,fra-1 dataset_1543
1470	ENSG00000175573	C11orf68	BLES03,P5326 dataset_1543
1471	ENSG00000175550	DRAP1	NC2-alpha dataset_1543
1472	ENSG00000175376	EIF1AD	haponin dataset_1543
1473	ENSG00000175334	BANF1	BAF,BCRP1,D14S1460,NGPS dataset_1543
1474	ENSG00000087365	SF3B2	Cus1,SAP145,SF3B145,SF3b1,SF3b150 dataset_1543
1475	ENSG00000174996	KLC2	#NAME?
1476	ENSG00000254461	RP11-755F10.3	#NAME?
1477	ENSG00000254855	RP11-867G23.1	#NAME?
1478	ENSG00000254762	RP11-867G23.2	#NAME?
1479	ENSG00000174903	RAB1B	#NAME?
1480	ENSG00000254452	RP11-867G23.4	#NAME?
1481	ENSG00000174871	CNIH2	CNIH-2,Cnil dataset_1543
1482	ENSG00000245156	RP11-867G23.3	#NAME?
1483	ENSG00000174851	YIF1A	54TM,FinGER7,YIF1,YIF1P dataset_1543
1484	ENSG00000179292	TMEM151A	TMEM151 dataset_1543
1485	ENSG00000254458	RP11-867G23.13	#NAME?
1486	ENSG00000174669	SLC29A2	DER12,ENT2,HNP36 dataset_1543
1487	ENSG00000254986	DPP3	DPPIII dataset_1543
1488	ENSG00000255517	CTD-3074O7.5	#NAME?
1489	ENSG00000256349	CTD-3074O7.11	BBS2L2 dataset_1543
1490	ENSG00000174483	BBS1	#NAME?
1491	ENSG00000174165	ZDHHC24	#NAME?
1492	ENSG00000248746	ACTN3	#NAME?
1493	ENSG00000173992	CCS	#NAME?
1494	ENSG00000182791	CCDC87	#NAME?
1495	ENSG00000199325	RNU4-39P	#NAME?
1496	ENSG00000239306	RBM14	COAA,PSP2,SIP,SYTIP1,TMEM137 dataset_1543
1497	ENSG00000248643	RBM14-RBM4	COAZ dataset_1543
1498	ENSG00000173933	RBM4	LARK,RBM4A,ZCCHC21,ZCRB3A dataset_1543
1499	ENSG00000173914	RBM4B	RBM30,RBM4L,ZCCHC15,ZCCHC21B,ZCRB3B dataset_1543
1500	ENSG00000173715	C11orf80	TOP6BL,TOPOVIBL dataset_1543
1501	ENSG00000173653	RCE1	FACE2,RCE1A,RCE1B dataset_1543
1502	ENSG00000173599	PC	PCB dataset_1543
1503	ENSG00000173120	KDM2A	CXXC8,FBL11,FBL7,FBXL11,JHDM1A,LILINA dataset_1543
1504	ENSG00000173020	ADRBK1	ADRBK1,BARK1,BETA-ARK1 dataset_1543
1505	ENSG00000172932	ANKRD13D	#NAME?
1506	ENSG00000172830	SSH3	SSH3L dataset_1543
1507	ENSG00000275200	AP001885.1	#NAME?
1508	ENSG00000172613	RAD9A	RAD9 dataset_1543
1509	ENSG00000175482	POLD4	POLDS,p12 dataset_1543
1510	ENSG00000274251	CTC-1337H24.3	#NAME?
1511	ENSG00000253024	RNU6-1238P	#NAME?
1512	ENSG00000172531	PPP1CA	PP-1A,PP1A,PP1alpha,PPP1A dataset_1543
1513	ENSG00000175463	TBC1D10C	CARABIN,EPI64C dataset_1543
1514	ENSG00000172508	CARNS1	ATPGD1 dataset_1543
1515	ENSG00000175634	RPS6KB2	KLS,P70-beta,P70-beta-1,P70-beta-2,S6K-beta2,S6K2,SRK,STK14B,p70(S6K)-beta,p70S6Kb dataset_1543
1516	ENSG00000255949	AP003419.16	#NAME?
1517	ENSG00000213402	PTPRCAP	CD45-AP,LPAP dataset_1543
1518	ENSG00000172725	CORO1B	CORONIN-2 dataset_1543
1519	ENSG00000175544	CABP4	CRSD,CSNB2B dataset_1543
1520	ENSG00000175514	GPR152	PGR5 dataset_1543
1521	ENSG00000172663	TMEM134	#NAME?
1522	ENSG00000110711	AIP	ARA9,FKBP16,FKBP37,SMTPHN,XAP-2,XAP2 dataset_1543
1523	ENSG00000276769	MIR6752	hsa-mir-6752 dataset_1543
1524	ENSG00000110697	PITPNM1	DRES9,NIR2,PITPNM,RDGB,RDGB1,RDGBA,RDGBA1,Rd9 dataset_1543
1525	ENSG00000167797	CDK2AP2	DOC-1R,p14 dataset_1543
1526	ENSG00000084207	GSTP1	DFN7,FAEES3,GST3,GSTP,HEL-S-22,PI dataset_1543
1527	ENSG00000255119	RP11-655M14.12	#NAME?
1528	ENSG00000184224	C11orf72	#NAME?
1529	ENSG00000167792	NDUFV1	CI-51K,CI51KD,UQOR1 dataset_1543
1530	ENSG00000231793	DOC2GP	#NAME?
1531	ENSG00000255318	RP11-655M14.13	#NAME?
1532	ENSG00000167799	NUDT8	#NAME?
1533	ENSG00000167800	TBX10	TBX13,TBX7 dataset_1543
1534	ENSG00000160172	FAM86C2P	#NAME?
1535	ENSG00000110057	UNC93B1	IIAE1,UNC93,UNC93B,Unc-93B1 dataset_1543
1536	ENSG00000006534	ALDH3B1	ALDH4,ALDH7 dataset_1543
1537	ENSG00000255306	RP5-901A4.1	#NAME?
1538	ENSG00000110717	NDUFS8	mir-4691 dataset_1543
1539	ENSG00000277703	MIR7113	#NAME?
1540	ENSG00000266737	MIR4691	#NAME?
1541	ENSG00000110721	CHKA	CHK,CK,CKI,EK dataset_1543
1542	ENSG00000255236	CTD-2655K5.1	#NAME?
1543	ENSG00000110066	SUV420H1	CGI-85,CGI85,SUV420H1 dataset_1543
1544	ENSG00000171067	C11orf24	DM4E3 dataset_1543
1545	ENSG00000110075	PPP6R3	C11orf23,PP6R3,SAP190,SAPL,SAPLa,SAPS3 dataset_1543
1546	ENSG00000132749	MTL5	CXCDC2,MTL5,MTLT dataset_1543
1547	ENSG00000110090	CPT1A	CPT1,CPT1-L,L-CPT1 dataset_1543
1548	ENSG00000197345	MRPL21	L21mt,MRP-L21 dataset_1543
1549	ENSG00000132740	IGHMBP2	CATF1,CMT2S,HCSA,HMN6,SMARD1,SMUBP2,ZFAND7 dataset_1543
1550	ENSG00000162341	TPCN2	SHEP10,TPC2 dataset_1543
1551	ENSG00000110092	CCND1	BCL1,D11S287E,PRAD1,U21B31 dataset_1543
1552	ENSG00000168040	FADD	GIG3,MORT1 dataset_1543
1553	ENSG00000131626	PPFIA1	LIP.1,LIP1,LIPRIN dataset_1543
1554	ENSG00000172893	DHCR7	SLOS dataset_1543
1555	ENSG00000254682	RP11-660L16.2	#NAME?
1556	ENSG00000172890	NADSYN1	#NAME?
1557	ENSG00000158483	FAM86C1	FAM86C dataset_1543
1558	ENSG00000254469	RP11-849H4.2	#NAME?
1559	ENSG00000137522	RNF121	#NAME?
1560	ENSG00000137497	NUMA1	NMP-22,NUMA dataset_1543
1561	ENSG00000212089	AP002490.1	#NAME?
1562	ENSG00000184154	LRTOMT	CFAP111,DFNB63,LRRC51 dataset_1543
1563	ENSG00000149357	LAMTOR1	C11orf59,PDRO,Ragulator1,p18,p27RF-Rho dataset_1543
1564	ENSG00000110200	ANAPC15	APC15,C11orf51,HSPC020 dataset_1543
1565	ENSG00000110203	FOLR3	FR-G,FR-gamma,gamma-hFR dataset_1543
1566	ENSG00000168010	ATG16L2	ATG16B,WDR80 dataset_1543
1567	ENSG00000137478	FCHSD2	NWK,SH3MD3 dataset_1543
1568	ENSG00000175591	P2RY2	HP2U,P2RU1,P2U,P2U1,P2UR,P2Y2,P2Y2R dataset_1543
1569	ENSG00000110237	ARHGEF17	P164RHOGEF,RHOGEF17,TEM4,p164-RhoGEF dataset_1543
1570	ENSG00000257038	RP11-800A3.7	#NAME?
1571	ENSG00000054967	RELT	TNFRSF19L,TRLT dataset_1543
1572	ENSG00000054965	FAM168A	KIAA0280,TCRP1 dataset_1543
1573	ENSG00000175582	RAB6A	RAB6 dataset_1543
1574	ENSG00000256034	RP11-707G14.1	#NAME?
1575	ENSG00000175581	MRPL48	CGI-118,HSPC290,L48MT,MRP-L48 dataset_1543
1576	ENSG00000181924	COA4	CHCHD8,CMC3,E2IG2 dataset_1543
1577	ENSG00000175575	PAAF1	PAAF,Rpn14,WDR71 dataset_1543
1578	ENSG00000175567	UCP2	BMIQ4,SLC25A8,UCPH dataset_1543
1579	ENSG00000254837	AP001372.2	#NAME?
1580	ENSG00000175536	LIPT2	#NAME?
1581	ENSG00000077514	POLD3	P66,P68,PPP1R128 dataset_1543
1582	ENSG00000166435	XRRA1	#NAME?
1583	ENSG00000118363	SPCS2	#NAME?
1584	ENSG00000137486	ARRB1	ARB1,ARR1 dataset_1543
1585	ENSG00000149273	RPS3	S3 dataset_1543
1586	ENSG00000206941	SNORD15A	RNU15A,SNORNA,U15A dataset_1543
1587	ENSG00000149243	KLHL35	#NAME?
1588	ENSG00000158555	GDPD5	GDE2,PP1665 dataset_1543
1589	ENSG00000149257	SERPINH1	AsTP3,CBP1,CBP2,HSP47,OI10,PIG14,PPROM,RA-A47,SERPINH2,gp46 dataset_1543
1590	ENSG00000062282	DGAT2	ARAT,GS1999FULL,HMFN1045 dataset_1543
1591	ENSG00000247867	CTD-2530H12.1	#NAME?
1592	ENSG00000255507	RP11-535A19.2	#NAME?
1593	ENSG00000198382	UVRAG	DHTX,VPS38,p63 dataset_1543
1594	ENSG00000085741	WNT11	HWNT11 dataset_1543
1595	ENSG00000255362	RP11-619A14.3	#NAME?
1596	ENSG00000137492	PRKRIR	DAP4,P52rIPK,PRKRIR,THAP0 dataset_1543
1597	ENSG00000179240	RP11-111M22.2	#NAME?
1598	ENSG00000255135	RP11-111M22.3	#NAME?
1599	ENSG00000158636	C11orf30	C11orf30,GL002 dataset_1543
1600	ENSG00000182704	TSKU	E2IG4,LRRC54,TSK dataset_1543
1601	ENSG00000255100	RP11-21L23.3	#NAME?
1602	ENSG00000261578	RP11-21L23.2	#NAME?
1603	ENSG00000178301	AQP11	AQPX1 dataset_1543
1604	ENSG00000149262	INTS4	INT4,MST093 dataset_1543
1605	ENSG00000254675	RP11-7I15.4	#NAME?
1606	ENSG00000151364	KCTD14	#NAME?
1607	ENSG00000159063	ALG8	CDG1H dataset_1543
1608	ENSG00000246174	KCTD21-AS1	#NAME?
1609	ENSG00000188997	KCTD21	KCASH2 dataset_1543
1610	ENSG00000118369	USP35	#NAME?
1611	ENSG00000137513	NARS2	DFNB94,SLM5,asnRS dataset_1543
1612	ENSG00000165490	DDIAS	C11orf82,noxin dataset_1543
1613	ENSG00000137509	PRCP	HUMPCP,PCP dataset_1543
1614	ENSG00000165494	PCF11	#NAME?
1615	ENSG00000269939	RP11-727A23.11	#NAME?
1616	ENSG00000247137	RP11-727A23.5	#NAME?
1617	ENSG00000137494	ANKRD42	PPP1R79,SARP dataset_1543
1618	ENSG00000137500	CCDC90B	MDS011,MDS025 dataset_1543
1619	ENSG00000255234	RP11-727A23.10	#NAME?
1620	ENSG00000171202	TMEM126A	OPA7 dataset_1543
1621	ENSG00000137504	CREBZF	SMILE,ZF dataset_1543
1622	ENSG00000137501	SYTL2	CHR11SYT,EXO4,PPP1R151,SGA72M,SLP2,SLP2A dataset_1543
1623	ENSG00000073921	PICALM	CALM,CLTH,LAP dataset_1543
1624	ENSG00000074266	EED	hsa-mir-6755 dataset_1543
1625	ENSG00000149196	C11orf73	C11orf73,HLD13,HSPC138,HSPC179,L7RN6,OPI10 dataset_1543
1626	ENSG00000166575	TMEM135	PMP52 dataset_1543
1627	ENSG00000110172	CHORDC1	CHP1 dataset_1543
1628	ENSG00000280367	RP11-121L10.2	#NAME?
1629	ENSG00000180773	SLC36A4	PAT4 dataset_1543
1630	ENSG00000166012	TAF1D	MIRN1304,hsa-mir-1304 dataset_1543
1631	ENSG00000182919	C11orf54	PTD012,PTOD012 dataset_1543
1632	ENSG00000042429	MED17	CRSP6,CRSP77,DRIP80,TRAP80 dataset_1543
1633	ENSG00000110218	PANX1	MRS1,PX1,UNQ2529 dataset_1543
1634	ENSG00000168876	ANKRD49	FGIF,GBIF dataset_1543
1635	ENSG00000020922	MRE11A	ATLD,HNGS1,MRE11A,MRE11B dataset_1543
1636	ENSG00000263465	SRSF8	DSM-1,SFRS2B,SRP46 dataset_1543
1637	ENSG00000149218	ENDOD1	#NAME?
1638	ENSG00000245552	RP11-712B9.2	#NAME?
1639	ENSG00000149212	SESN3	SEST3 dataset_1543
1640	ENSG00000077458	FAM76B	#NAME?
1641	ENSG00000166037	CEP57	MVA2,PIG8,TSP57 dataset_1543
1642	ENSG00000087053	MTMR2	CMT4B,CMT4B1 dataset_1543
1643	ENSG00000110318	KIAA1377	KIAA1377 dataset_1543
1644	ENSG00000187151	ANGPTL5	#NAME?
1645	ENSG00000277459	RP11-732A21.3	#NAME?
1646	ENSG00000137693	YAP1	COB1,YAP,YAP2,YAP65,YKI dataset_1543
1647	ENSG00000023445	BIRC3	AIP1,API2,CIAP2,HAIP1,HIAP1,MALT2,MIHC,RNF49,c-IAP2 dataset_1543
1648	ENSG00000110330	BIRC2	API1,HIAP2,Hiap-2,MIHB,RNF48,c-IAP1,cIAP1 dataset_1543
1649	ENSG00000170903	MSANTD4	KIAA1826 dataset_1543
1650	ENSG00000149313	AASDHPPT	AASD-PPT,ACPS,CGI-80,LYS2,LYS5 dataset_1543
1651	ENSG00000182359	KBTBD3	BKLHD3 dataset_1543
1652	ENSG00000110660	SLC35F2	HSNOV1 dataset_1543
1653	ENSG00000166266	CUL5	VACM-1,VACM1 dataset_1543
1654	ENSG00000075239	ACAT1	ACAT,MAT,T2,THIL dataset_1543
1655	ENSG00000255467	RP11-144G7.2	#NAME?
1656	ENSG00000149311	ATM	AT1,ATA,ATC,ATD,ATDC,ATE,TEL1,TELO1 dataset_1543
1657	ENSG00000149308	NPAT	E14,E14/NPAT,p220 dataset_1543
1658	ENSG00000178202	KDELC2	#NAME?
1659	ENSG00000178105	DDX10	HRH-J8 dataset_1543
1660	ENSG00000137710	RDX	DFNB24 dataset_1543
1661	ENSG00000137714	FDX1	ADX,FDX,LOH11CR1D dataset_1543
1662	ENSG00000170145	SIK2	LOH11CR1I,QIK,SIK-2,SNF1LK2 dataset_1543
1663	ENSG00000150764	DIXDC1	CCD1 dataset_1543
1664	ENSG00000150768	DLAT	DLTA,PDC-E2,PDCE2 dataset_1543
1665	ENSG00000150787	PTS	PTPS dataset_1543
1666	ENSG00000086827	ZW10	HZW10,KNTC1AP dataset_1543
1667	ENSG00000048028	USP28	#NAME?
1668	ENSG00000076053	RBM7	#NAME?
1669	ENSG00000180425	C11orf71	#NAME?
1670	ENSG00000076043	REXO2	CGI-114,REX2,RFN,SFN dataset_1543
1671	ENSG00000182985	CADM1	BL2,IGSF4,IGSF4A,NECL2,Necl-2,RA175,ST17,SYNCAM,TSLC1,sTSLC-1,sgIGSF,synCAM1 dataset_1543
1672	ENSG00000137656	BUD13	Cwc26,fSAP71 dataset_1543
1673	ENSG00000226645	AP006216.10	#NAME?
1674	ENSG00000235910	APOA1-AS	#NAME?
1675	ENSG00000118137	APOA1	apo(a) dataset_1543
1676	ENSG00000254678	RP11-109L13.5	#NAME?
1677	ENSG00000168092	PAFAH1B2	HEL-S-303 dataset_1543
1678	ENSG00000149577	SIDT2	CGI-40 dataset_1543
1679	ENSG00000160613	PCSK7	LPC,PC7,PC8,SPC7 dataset_1543
1680	ENSG00000167257	RNF214	#NAME?
1681	ENSG00000110274	CEP164	NPHP15 dataset_1543
1682	ENSG00000250699	AP000892.4	#NAME?
1683	ENSG00000255384	RP11-770J1.4	#NAME?
1684	ENSG00000118058	KMT2A	ALL-1,CXXC7,HRX,HTRX1,MLL,MLL-AF9,MLL/GAS7,MLL1,MLL1A,TET1-MLL,TRX1,WDSTS dataset_1543
1685	ENSG00000110367	DDX6	HLR2,P54,RCK dataset_1543
1686	ENSG00000278376	RP11-158I9.8	#NAME?
1687	ENSG00000255121	RP11-110I1.12	#NAME?
1688	ENSG00000186166	CCDC84	DLNB14 dataset_1543
1689	ENSG00000137700	SLC37A4	G6PT1,G6PT2,G6PT3,GSD1b,GSD1c,GSD1d,PRO0685,TRG-19,TRG19 dataset_1543
1690	ENSG00000255114	RP11-110I1.6	#NAME?
1691	ENSG00000149428	HYOU1	GRP-170,Grp170,HSP12A,ORP-150,ORP150 dataset_1543
1692	ENSG00000271751	RP11-110I1.14	#NAME?
1693	ENSG00000160695	VPS11	END1,HLD12,PEP5,RNF108,hVPS11 dataset_1543
1694	ENSG00000272186	RP11-110I1.13	#NAME?
1695	ENSG00000256269	HMBS	PBG-D,PBGD,PORC,UPS dataset_1543
1696	ENSG00000188486	H2AFX	H2A.X,H2A/X,H2AX dataset_1543
1697	ENSG00000172269	DPAGT1	ALG7,CDG-Ij,CDG1J,CMS13,CMSTA2,D11S366,DGPT,DPAGT,DPAGT2,G1PT,GPT,UAGT,UGAT dataset_1543
1698	ENSG00000172375	C2CD2L	DLNB23,TMEM24 dataset_1543
1699	ENSG00000172273	HINFP	HiNF-P,MIZF,ZNF743 dataset_1543
1700	ENSG00000110395	CBL	C-CBL,CBL2,FRA11B,NSLL,RNF55 dataset_1543
1701	ENSG00000173456	RNF26	#NAME?
1702	ENSG00000254740	RP11-334E6.3	#NAME?
1703	ENSG00000036672	USP2	UBP41,USP9 dataset_1543
1704	ENSG00000245248	USP2-AS1	#NAME?
1705	ENSG00000110400	PVRL1	CD111,CLPED1,ED4,HIgR,HV1S,HVEC,OFC7,PRR,PRR1,PVRL1,PVRR,PVRR1,SK-12,nectin-1 dataset_1543
1706	ENSG00000254854	CTD-2523D13.2	#NAME?
1707	ENSG00000176984	AP000679.2	#NAME?
1708	ENSG00000154114	TBCEL	El,LRRC35 dataset_1543
1709	ENSG00000109929	SC5D	ERG3,S5DES,SC5DL dataset_1543
1710	ENSG00000137642	SORL1	C11orf32,LR11,LRP9,SORLA,SorLA-1,gp250 dataset_1543
1711	ENSG00000246790	RP11-730K11.1	#NAME?
1712	ENSG00000109971	HSPA8	HEL-33,HEL-S-72p,HSC54,HSC70,HSC71,HSP71,HSP73,HSPA10,LAP-1,LAP1,NIP71 dataset_1543
1713	ENSG00000149564	ESAM	W117m dataset_1543
1714	ENSG00000250073	RP11-677M14.3	#NAME?
1715	ENSG00000120458	MSANTD2	C11orf61 dataset_1543
1716	ENSG00000245498	RP11-677M14.7	#NAME?
1717	ENSG00000154134	ROBO3	HGPPS,HGPS,RBIG1,RIG1 dataset_1543
1718	ENSG00000149548	CCDC15	#NAME?
1719	ENSG00000150433	TMEM218	#NAME?
1720	ENSG00000187686	KRT18P59	#NAME?
1721	ENSG00000149547	EI24	EPG4,PIG8,TP53I8 dataset_1543
1722	ENSG00000222297	RNU6-1156P	#NAME?
1723	ENSG00000134910	STT3A	ITM1,STT3-A,TMC dataset_1543
1724	ENSG00000254671	STT3A-AS1	#NAME?
1725	ENSG00000149554	CHEK1	CHK1 dataset_1543
1726	ENSG00000064309	CDON	CDO,CDON1,HPE11,ORCAM dataset_1543
1727	ENSG00000165526	RPUSD4	#NAME?
1728	ENSG00000197798	FAM118B	#NAME?
1729	ENSG00000182934	SRPR	DP,SRPR,Sralpha dataset_1543
1730	ENSG00000110074	FOXRED1	FP634,H17 dataset_1543
1731	ENSG00000110063	DCPS	ARS,DCS1,HINT-5,HINT5,HSL1,HSPC015 dataset_1543
1732	ENSG00000255062	RP11-712L6.5	#NAME?
1733	ENSG00000170322	NFRKB	INO80G dataset_1543
1734	ENSG00000170325	PRDM10	PFM7 dataset_1543
1735	ENSG00000233220	LINC00167	#NAME?
1736	ENSG00000120451	SNX19	CHET8 dataset_1543
1737	ENSG00000151503	NCAPD3	CAP-D3,CAPD3,hCAP-D3,hHCP-6,hcp-6 dataset_1543
1738	ENSG00000151502	VPS26B	Pep8b dataset_1543
1739	ENSG00000149328	GLB1L2	MST114,MSTP114 dataset_1543
1740	ENSG00000177663	IL17RA	CANDF5,CD217,CDw217,IL-17RA,IL17R,hIL-17R dataset_1543
1741	ENSG00000069998	CECR5	#NAME?
1742	ENSG00000185837	CECR5-AS1	CECR4,NCRNA00017 dataset_1543
1743	ENSG00000131100	ATP6V1E1	ATP6E,ATP6E2,ATP6V1E,P31,Vma4 dataset_1543
1744	ENSG00000099968	BCL2L13	BCL-RAMBO,Bcl2-L-13,MIL1 dataset_1543
1745	ENSG00000243156	MICAL3	MICAL-3 dataset_1543
1746	ENSG00000225335	XXbac-B476C20.9	#NAME?
1747	ENSG00000215193	PEX26	PBD7A,PBD7B,PEX26M1T,Pex26pM1T dataset_1543
1748	ENSG00000183628	DGCR6	#NAME?
1749	ENSG00000223461	AC004471.9	#NAME?
1750	ENSG00000070413	DGCR2	DGS-C,IDD,LAN,SEZ-12 dataset_1543
1751	ENSG00000231086	TSSK1A	#NAME?
1752	ENSG00000272682	AC004471.10	#NAME?
1753	ENSG00000206203	TSSK2	DGS-G,SPOGA2,STK22B,TSK2 dataset_1543
1754	ENSG00000100056	DGCR14	DGCR13,DGS-H,DGS-I,DGSH,DGSI,ES2,Es2el dataset_1543
1755	ENSG00000100075	SLC25A1	CTP,D2L2AD,SEA,SLC20A3 dataset_1543
1756	ENSG00000100084	HIRA	DGCR1,TUP1,TUPLE1 dataset_1543
1757	ENSG00000185608	MRPL40	L40mt,MRP-L22,MRP-L40,MRPL22,NLVCF,URIM dataset_1543
1758	ENSG00000242259	C22orf39	#NAME?
1759	ENSG00000185065	AC000068.5	#NAME?
1760	ENSG00000273300	AC000068.9	#NAME?
1761	ENSG00000070010	UFD1L	UFD1 dataset_1543
1762	ENSG00000093009	CDC45	CDC45L,CDC45L2,MGORS7,PORC-PI-1 dataset_1543
1763	ENSG00000184702	2022-09-05	#NAME?
1764	ENSG00000185838	GNB1L	DGCRK3,FKSG1,GY2,WDR14,WDVCF dataset_1543
1765	ENSG00000215012	C22orf29	BOP dataset_1543
1766	ENSG00000093010	COMT	#NAME?
1767	ENSG00000184470	TXNRD2	SELZ,TR,TR-BETA,TR3,TRXR2 dataset_1543
1768	ENSG00000183597	TANGO2	C22orf25,MECRCN dataset_1543
1769	ENSG00000128191	DGCR8	MIRN1306,hsa-mir-1306,mir-1306 dataset_1543
1770	ENSG00000243762	AC006547.8	#NAME?
1771	ENSG00000099899	TRMT2A	HTF9C dataset_1543
1772	ENSG00000278278	MIR6816	hsa-mir-6816 dataset_1543
1773	ENSG00000099901	RANBP1	HTF9A dataset_1543
1774	ENSG00000264346	SNORA77	#NAME?
1775	ENSG00000099904	ZDHHC8	DHHC8,ZDHHCL1,ZNF378 dataset_1543
1776	ENSG00000273343	XXbac-B444P24.13	#NAME?
1777	ENSG00000128185	DGCR6L	DGCR6 dataset_1543
1778	ENSG00000273139	XXbac-B444P24.14	#NAME?
1779	ENSG00000185252	ZNF74	COS52,ZFP520,ZNF520,hZNF7 dataset_1543
1780	ENSG00000099910	KLHL22	KELCHL dataset_1543
1781	ENSG00000099917	MED15	ARC105,CAG7A,CTG7A,PCQAP,TIG-1,TIG1,TNRC7 dataset_1543
1782	ENSG00000241973	PI4KA	PI4K-ALPHA,PIK4CA,PMGYCHA,pi4K230 dataset_1543
1783	ENSG00000099940	SNAP29	CEDNIK,SNAP-29 dataset_1543
1784	ENSG00000099942	CRKL	#NAME?
1785	ENSG00000099949	LZTR1	BTBD29,LZTR-1,NS10,SWNTS2 dataset_1543
1786	ENSG00000272829	XXbac-B135H6.18	#NAME?
1787	ENSG00000184436	THAP7	#NAME?
1788	ENSG00000230513	THAP7-AS1	#NAME?
1789	ENSG00000185651	UBE2L3	E2-F1,L-UBC,UBCH7,UbcM4 dataset_1543
1790	ENSG00000161179	YDJC	#NAME?
1791	ENSG00000161180	CCDC116	#NAME?
1792	ENSG00000273342	KB-1440D3.14	#NAME?
1793	ENSG00000128228	SDF2L1	#NAME?
1794	ENSG00000100023	PPIL2	CYC4,CYP60,Cyp-60,UBOX7,hCyP-60 dataset_1543
1795	ENSG00000212102	MIR301B	MIRN301B,mir-301b dataset_1543
1796	ENSG00000207751	MIR130B	MIRN130B,mir-130b dataset_1543
1797	ENSG00000272954	KB-1440D3.13	#NAME?
1798	ENSG00000100030	MAPK1	ERK,ERK-2,ERK2,ERT1,MAPK2,P42MAPK,PRKM1,PRKM2,p38,p40,p41,p41mapk,p42-MAPK dataset_1543
1799	ENSG00000100034	PPM1F	CAMKP,CaMKPase,FEM-2,POPX2,hFEM-2 dataset_1543
1800	ENSG00000224086	LL22NC03-86G7.1	#NAME?
1801	ENSG00000100038	TOP3B	TOP3B1 dataset_1543
1802	ENSG00000275004	ZNF280B	5'OY11.1,D87009.C22.3,SUHW2,ZNF279,ZNF632 dataset_1543
1803	ENSG00000272578	AP000347.2	#NAME?
1804	ENSG00000228315	GUSBP11	#NAME?
1805	ENSG00000273000	KB-1572G7.2	#NAME?
1806	ENSG00000187792	ZNF70	Cos17 dataset_1543
1807	ENSG00000128218	VPREB3	8HS20,N27C7-2 dataset_1543
1808	ENSG00000169314	C22orf15	N27C7-3 dataset_1543
1809	ENSG00000250479	CHCHD10	C22orf16,FTDALS2,IMMD,N27C7-4,SMAJ dataset_1543
1810	ENSG00000099953	MMP11	SL-3,ST3,STMY3 dataset_1543
1811	ENSG00000280178	AP000349.2	#NAME?
1812	ENSG00000099956	SMARCB1	BAF47,CSS3,INI1,MRD15,PPP1R144,RDT,RTPS1,SNF5,SNF5L1,SWNTS1,Sfh1p,Snr1,hSNFS dataset_1543
1813	ENSG00000099958	DERL3	C22orf14,IZP6,LLN2,derlin-3 dataset_1543
1814	ENSG00000240972	MIF	GIF,GLIF,MMIF dataset_1543
1815	ENSG00000218537	MIF-AS1	#NAME?
1816	ENSG00000277002	AP000350.1	#NAME?
1817	ENSG00000099991	CABIN1	CAIN,KB-318B8.7,PPP3IN dataset_1543
1818	ENSG00000215464	AP000354.2	#NAME?
1819	ENSG00000100014	SPECC1L	CYTSA,GBBB2,OBLFC1 dataset_1543
1820	ENSG00000258555	SPECC1L-ADORA2A	#NAME?
1821	ENSG00000197077	KIAA1671	#NAME?
1822	ENSG00000279241	RP11-9F11.3	#NAME?
1823	ENSG00000100068	LRP5L	#NAME?
1824	ENSG00000100099	HPS4	BLOC3S2,LE dataset_1543
1825	ENSG00000100104	SRRD	HC/HCC,SRR1L dataset_1543
1826	ENSG00000100109	TFIP11	NTR1,STIP-1,Spp382,TIP39,bK445C9.6 dataset_1543
1827	ENSG00000261188	CTA-445C9.14	#NAME?
1828	ENSG00000128294	TPST2	TANGO13B dataset_1543
1829	ENSG00000180957	PITPNB	PI-TP-beta,PtdInsTP,VIB1B dataset_1543
1830	ENSG00000235954	TTC28-AS1	TTC28-AS,TTC28AS,dJ353E16.2 dataset_1543
1831	ENSG00000277460	TTC28-AS1_1	#NAME?
1832	ENSG00000264073	MIR3199-1	mir-3199-1 dataset_1543
1833	ENSG00000183765	CHEK2	CDS1,CHK2,HuCds1,LFS2,PP1425,RAD53,hCds1 dataset_1543
1834	ENSG00000100209	HSCB	DNAJC20,HSC20,JAC1 dataset_1543
1835	ENSG00000100219	XBP1	TREB-5,TREB5,XBP-1,XBP2 dataset_1543
1836	ENSG00000226471	CTA-292E10.6	#NAME?
1837	ENSG00000100263	RHBDD3	C22orf3,HS984G1A,PTAG dataset_1543
1838	ENSG00000182944	EWSR1	EWS,EWS-FLI1,bK984G1.4 dataset_1543
1839	ENSG00000185340	GAS2L1	GAR22 dataset_1543
1840	ENSG00000100276	RASL10A	RRP22 dataset_1543
1841	ENSG00000273216	AC002059.10	#NAME?
1842	ENSG00000100296	THOC5	C22orf19,Fmip,PK1.3,fSAP79 dataset_1543
1843	ENSG00000186575	NF2	ACN,BANF,SCH dataset_1543
1844	ENSG00000100319	ZMAT5	SNRNP20,U11/U12-20K,ZC3H19 dataset_1543
1845	ENSG00000184076	UQCR10	HSPC051,HSPC119,HSPC151,QCR9,UCCR7.2,UCRC dataset_1543
1846	ENSG00000100325	ASCC2	ASC1p100,p100 dataset_1543
1847	ENSG00000100330	MTMR3	FYVE-DSP1,ZFYVE10 dataset_1543
1848	ENSG00000278841	AC004819.1	#NAME?
1849	ENSG00000239282	GATSL3	CASTOR1 dataset_1543
1850	ENSG00000187860	CCDC157	#NAME?
1851	ENSG00000099995	SF3A1	PRP21,PRPF21,SAP114,SF3A120 dataset_1543
1852	ENSG00000099999	RNF215	#NAME?
1853	ENSG00000222915	RNU6-564P	#NAME?
1854	ENSG00000272689	RP4-539M6.21	#NAME?
1855	ENSG00000242114	MTFP1	HSPC242,MTP18 dataset_1543
1856	ENSG00000184792	OSBP2	HLM,ORP-4,ORP4,OSBPL1,OSBPL4 dataset_1543
1857	ENSG00000133422	MORC2	CMT2Z,ZCW3,ZCWCC1 dataset_1543
1858	ENSG00000253352	TUG1	#NAME?
1859	ENSG00000276664	TUG1_1	#NAME?
1860	ENSG00000276057	TUG1_2	#NAME?
1861	ENSG00000273387	RP3-412A9.16	#NAME?
1862	ENSG00000183963	SMTN	#NAME?
1863	ENSG00000182541	LIMK2	#NAME?
1864	ENSG00000100100	PIK3IP1	HGFL,hHGFL(S) dataset_1543
1865	ENSG00000228839	PIK3IP1-AS1	#NAME?
1866	ENSG00000100105	PATZ1	MAZR,PATZ,RIAZ,ZBTB19,ZNF278,ZSG,dJ400N23 dataset_1543
1867	ENSG00000213888	LINC01521	#NAME?
1868	ENSG00000198089	SFI1	PISD,PPP1R139,hSfi1p dataset_1543
1869	ENSG00000184708	EIF4ENIF1	4E-T,Clast4 dataset_1543
1870	ENSG00000241878	PISD	hsa-mir-7109 dataset_1543
1871	ENSG00000183530	PRR14L	C22orf30 dataset_1543
1872	ENSG00000100150	DEPDC5	DEP.5,FFEVF,FFEVF1 dataset_1543
1873	ENSG00000242251	RN7SL20P	#NAME?
1874	ENSG00000128245	YWHAH	YWHA1 dataset_1543
1875	ENSG00000128254	C22orf24	HSN44A4A dataset_1543
1876	ENSG00000100225	FBXO7	FBX,FBX07,FBX7,PARK15,PKPS dataset_1543
1877	ENSG00000100281	HMGXB4	HMG2L1,HMGBCG,THC211630 dataset_1543
1878	ENSG00000100284	TOM1	#NAME?
1879	ENSG00000273176	RP3-510H16.3	#NAME?
1880	ENSG00000100297	MCM5	CDC46,P1-CDC46 dataset_1543
1881	ENSG00000100320	RBFOX2	FOX2,Fox-2,HNRBP2,HRNBP2,RBM9,RTA,dJ106I20.3,fxh dataset_1543
1882	ENSG00000279927	CTA-212A2.4	#NAME?
1883	ENSG00000100345	MYH9	BDPLT6,DFNA17,EPSTS,FTNS,MHA,NMHC-II-A,NMMHC-IIA,NMMHCA dataset_1543
1884	ENSG00000223695	RP4-633O19__A.1	#NAME?
1885	ENSG00000228719	RP5-1119A7.14	#NAME?
1886	ENSG00000100348	TXN2	COXPD29,MT-TRX,MTRX,TRX2 dataset_1543
1887	ENSG00000100350	FOXRED2	ERFAD dataset_1543
1888	ENSG00000100353	EIF3D	EIF3S7,eIF3-p66,eIF3-zeta dataset_1543
1889	ENSG00000100360	IFT27	BBS19,RABL4,RAYL dataset_1543
1890	ENSG00000128311	TST	RDS dataset_1543
1891	ENSG00000128309	MPST	MST,TST2,TUM1 dataset_1543
1892	ENSG00000100379	KCTD17	#NAME?
1893	ENSG00000201078	RN7SKP214	#NAME?
1894	ENSG00000133466	C1QTNF6	CTFP6,CTRP6,ZACRP6 dataset_1543
1895	ENSG00000128283	CDC42EP1	BORG5,CEP1,MSE55 dataset_1543
1896	ENSG00000100083	GGA1	#NAME?
1897	ENSG00000233360	Z83844.1	#NAME?
1898	ENSG00000241360	PDXP	CIN,PLP,dJ37E16.5 dataset_1543
1899	ENSG00000100106	TRIOBP	DFNB28,HRIHFB2122,TAP68,TARA,dJ37E16.4 dataset_1543
1900	ENSG00000189060	H1F0	H10,H1FV dataset_1543
1901	ENSG00000100116	GCAT	KBL dataset_1543
1902	ENSG00000100124	ANKRD54	LIAR dataset_1543
1903	ENSG00000207945	MIR658	#NAME?
1904	ENSG00000207696	MIR659	MIRN659,hsa-mir-659,mir-659 dataset_1543
1905	ENSG00000100129	EIF3L	EIF3EIP,EIF3S11,EIF3S6IP,HSPC021,HSPC025,MSTP005 dataset_1543
1906	ENSG00000100139	MICALL1	MICAL-L1,MIRAB13 dataset_1543
1907	ENSG00000184381	PLA2G6	CaI-PLA2,GVI,INAD1,IPLA2-VIA,NBIA2,NBIA2A,NBIA2B,PARK14,PLA2,PNPLA9,iPLA2,iPLA2beta dataset_1543
1908	ENSG00000185022	MAFF	U-MAF,hMafF dataset_1543
1909	ENSG00000100196	KDELR3	ERD2L3 dataset_1543
1910	ENSG00000100201	DDX17	P72,RH70 dataset_1543
1911	ENSG00000184949	FAM227A	#NAME?
1912	ENSG00000100211	CBY1	C22orf2,CBY,HS508I15A,PGEA1,PIGEA-14,PIGEA14,arb1 dataset_1543
1913	ENSG00000100221	JOSD1	dJ508I15.2 dataset_1543
1914	ENSG00000100226	GTPBP1	GP-1,GP1,HSPC018 dataset_1543
1915	ENSG00000100307	CBX7	#NAME?
1916	ENSG00000227009	FUNDC2P4	#NAME?
1917	ENSG00000100316	RPL3	ASC-1,L3,TARBP-B dataset_1543
1918	ENSG00000263764	SNORD43	RNU43,U43 dataset_1543
1919	ENSG00000100324	TAB1	3'-Tab1,MAP3K7IP1 dataset_1543
1920	ENSG00000100335	MIEF1	HSU79252,MID51,SMCR7L,dJ1104E15.3 dataset_1543
1921	ENSG00000128272	ATF4	CREB-2,CREB2,TAXREB67,TXREB dataset_1543
1922	ENSG00000261202	RP3-496C20.1	#NAME?
1923	ENSG00000100354	TNRC6B	#NAME?
1924	ENSG00000239900	ADSL	AMPS,ASASE,ASL dataset_1543
1925	ENSG00000196588	MKL1	BSAC,MAL,MRTF-A dataset_1543
1926	ENSG00000100372	SLC25A17	PMP34 dataset_1543
1927	ENSG00000100380	ST13	AAG2,FAM10A1,FAM10A4,HIP,HOP,HSPABP,HSPABP1,P48,PRO0786,SNC6 dataset_1543
1928	ENSG00000196236	XPNPEP3	APP3,ICP55,NPHPL1 dataset_1543
1929	ENSG00000100387	RBX1	BA554C12.1,RNF75,ROC1 dataset_1543
1930	ENSG00000100393	EP300	MIRN1281,hsa-mir-1281 dataset_1543
1931	ENSG00000221160	MIR1281	#NAME?
1932	ENSG00000215771	LRRC37A14P	#NAME?
1933	ENSG00000231993	EP300-AS1	#NAME?
1934	ENSG00000100395	L3MBTL2	H-l(3)mbt-l,L3MBT dataset_1543
1935	ENSG00000100401	RANGAP1	Fug1,RANGAP,SD dataset_1543
1936	ENSG00000167074	TEF	#NAME?
1937	ENSG00000199865	RNU6-495P	#NAME?
1938	ENSG00000273424	CTA-223H9.9	#NAME?
1939	ENSG00000183864	TOB2	APRO5,TOB4,TOBL,TROB2 dataset_1543
1940	ENSG00000100410	PHF5A	INI,Rds3,SAP14b,SF3B7,SF3b14b,bK223H9.2 dataset_1543
1941	ENSG00000100412	ACO2	ACONM,HEL-S-284,ICRD,OCA8,OPA9 dataset_1543
1942	ENSG00000100413	POLR3H	RPC22.9,RPC8 dataset_1543
1943	ENSG00000100417	PMM1	Sec53 dataset_1543
1944	ENSG00000100418	DESI1	D15Wsu75e,DESI2,DJ347H13.4,DeSI-1,FAM152B,PPPDE2 dataset_1543
1945	ENSG00000196419	XRCC6	CTC75,CTCBF,G22P1,KU70,ML8,TLAA dataset_1543
1946	ENSG00000100138	NHP2L1	15.5K,FA-1,FA1,NHP2L1,NHPX,OTK27,SNRNP15-5,SPAG12,SSFA1 dataset_1543
1947	ENSG00000184208	C22orf46	#NAME?
1948	ENSG00000100147	CCDC134	#NAME?
1949	ENSG00000198911	SREBF2	SREBP-2,SREBP2,bHLHd2 dataset_1543
1950	ENSG00000184068	RP5-821D11.7	#NAME?
1951	ENSG00000100162	CENPM	C22orf18,CENP-M,PANE1 dataset_1543
1952	ENSG00000198951	NAGA	D22S674,GALB dataset_1543
1953	ENSG00000177096	FAM109B	IPIP27B,Ses2 dataset_1543
1954	ENSG00000238498	snoU13	#NAME?
1955	ENSG00000183172	SMDT1	C22orf32,DDDD,EMRE,dJ186O1.1 dataset_1543
1956	ENSG00000184983	NDUFA6	B14,CI-B14,LYRM6,NADHB14 dataset_1543
1957	ENSG00000270083	RP1-257I20.14	#NAME?
1958	ENSG00000237037	NDUFA6-AS1	#NAME?
1959	ENSG00000182057	OGFRP1	#NAME?
1960	ENSG00000189306	RRP7A	BK126B4.3,CGI-96 dataset_1543
1961	ENSG00000265106	Z93241.1	#NAME?
1962	ENSG00000183569	SERHL2	dJ222E13.1 dataset_1543
1963	ENSG00000182841	RRP7B	RRP7B,dJ222E13.2 dataset_1543
1964	ENSG00000100227	POLDIP3	PDIP46,SKAR dataset_1543
1965	ENSG00000270022	RNU12	#NAME?
1966	ENSG00000276027	U12	RNU12-1,RNU12L,RNU12P,dJ222E13.7 dataset_1543
1967	ENSG00000242247	ARFGAP3	ARFGAP1 dataset_1543
1968	ENSG00000100266	PACSIN2	SDPII dataset_1543
1969	ENSG00000100271	TTLL1	C22orf7,HS323M22B dataset_1543
1970	ENSG00000234735	AL022237.3	#NAME?
1971	ENSG00000100290	BIK	BIP1,BP4,NBK dataset_1543
1972	ENSG00000100294	MCAT	FASN2C,MCT,MT,NET62,fabD dataset_1543
1973	ENSG00000100304	TTLL12	dJ526I14.2 dataset_1543
1974	ENSG00000186976	EFCAB6	DJBP,HSCBCIP1,dJ185D5.1 dataset_1543
1975	ENSG00000261251	RP3-388M5.9	#NAME?
1976	ENSG00000100344	PNPLA3	ADPN,C22orf20,iPLA(2)epsilon dataset_1543
1977	ENSG00000100347	SAMM50	CGI-51,OMP85,SAM50,TOB55,TRG-3,YNL026W dataset_1543
1978	ENSG00000224856	RP4-796I17.5	#NAME?
1979	ENSG00000188677	PARVB	CGI-56 dataset_1543
1980	ENSG00000226328	NUP50-AS1	#NAME?
1981	ENSG00000093000	NUP50	NPAP60,NPAP60L dataset_1543
1982	ENSG00000100376	FAM118A	C22orf8 dataset_1543
1983	ENSG00000130638	ATXN10	E46L,HUMEEP,SCA10 dataset_1543
1984	ENSG00000265610	CR536603.1	#NAME?
1985	ENSG00000188064	WNT7B	#NAME?
1986	ENSG00000231711	LINC00899	#NAME?
1987	ENSG00000273289	RP6-109B7.5	#NAME?
1988	ENSG00000241990	PRR34-AS1	#NAME?
1989	ENSG00000197182	MIRLET7BHG	#NAME?
1990	ENSG00000182257	PRR34	C22orf26 dataset_1543
1991	ENSG00000231010	RP6-109B7.2	#NAME?
1992	ENSG00000235159	RP6-109B7.4	#NAME?
1993	ENSG00000266533	MIR3619	#NAME?
1994	ENSG00000205643	CDPF1	C22orf40 dataset_1543
1995	ENSG00000130943	PKDREJ	#NAME?
1996	ENSG00000075234	TTC38	LL22NC03-5H6.5 dataset_1543
1997	ENSG00000277232	GTSE1-AS1	CN5H6.4,LL22NC03-5H6.6 dataset_1543
[truncated: 8,871 more rows]
