# Supplementary material for: GMEB2 Promotes the Growth of Colorectal Cancer by Activating ADRM1 Transcription and NF-κB Signalling and Is Positively Regulated by the m6A Reader YTHDF1
Source: Cancers (Basel). 2022 Dec 8;14(24):6046. doi: 10.3390/cancers14246046 (PMC9776391; doi:10.3390/cancers14246046)
Supplement: Supplementary file 1 [file cancers-14-06046-s001.zip › Supplementary Table S5.xlsx]

## Sheet: Sheet1
Supplementary Table S5
The Pearson correlation analysis results for GMEB2 with PCC > 0.75
	ENSEMBL	GENE SYMBOL	PCC
1	ENSG00000101193.7	GID8	0.86
2	ENSG00000149658.17	YTHDF1	0.86
3	ENSG00000101161.7	PRPF6	0.84
4	ENSG00000197114.11	ZGPAT	0.84
5	ENSG00000101152.10	DNAJC5	0.83
6	ENSG00000101181.17	MTG2	0.83
7	ENSG00000130699.16	TAF4	0.82
8	ENSG00000101189.6	MRGBP	0.81
9	ENSG00000101191.16	DIDO1	0.81
10	ENSG00000149657.19	LSM14B	0.8
11	ENSG00000124228.14	DDX27	0.8
12	ENSG00000184402.14	SS18L1	0.8
13	ENSG00000131043.11	AAR2	0.79
14	ENSG00000198646.13	NCOA6	0.79
15	ENSG00000171456.16	ASXL1	0.79
16	ENSG00000101407.12	TTI1	0.79
17	ENSG00000125970.11	RALY	0.79
18	ENSG00000130706.12	ADRM1	0.79
19	ENSG00000198276.13	UCKL1	0.79
20	ENSG00000158480.10	SPATA2	0.78
21	ENSG00000124214.19	STAU1	0.77
22	ENSG00000101199.12	ARFGAP1	0.77
23	ENSG00000101158.12	NELFCD	0.77
24	ENSG00000101452.14	DHX35	0.76
25	ENSG00000124217.4	MOCS3	0.76
26	ENSG00000101337.15	TM9SF4	0.76
27	ENSG00000080189.14	SLC35C2	0.76
